# Supplementary material for: Photoinduced C–O bond cleavage for copper-catalyzed allenyl radical cyanation
Source: Royal Society of Chemistry journal article supplement (doi:10.1039/d2qo00938b), 2022-01-01

## Supporting Information

# Photoinduced C-O bond cleavage for copper-catalyzed allenyl radical cyanation

Fu-Dong Lu,<sup>a</sup> Zhen-Cao Shu,<sup>b</sup> Gui-Feng He,<sup>a</sup> Jun-Chuan Bai,<sup>a</sup> Liang-Qiu Lu,<sup>\*,a,c</sup> and Wen-Jing Xiao<sup>\*,a</sup>

<sup>a</sup>CCNU-uOttawa Joint Research Centre, Key Laboratory of Pesticides and Chemical Biology, Ministry of Education, College of Chemistry, Central China Normal University, 152 Luoyu Road, Wuhan 430079, China

<sup>b</sup>Wuhan Youji Industries Co., Ltd, No.1 2nd Chemical Rd., Wuhan, Hubei, 430082, China

<sup>c</sup>State Key Laboratory for Oxo Synthesis and Selective Oxidation, Lanzhou Institute of Chemical Physics (LICP), Chinese Academy of Sciences, Lanzhou 730000, China

### Table of Contents

---

|                                                                    |            |
|--------------------------------------------------------------------|------------|
| <b>1. General Information</b>                                      | <b>S2</b>  |
| <b>2. Preparation and Characterization of Materials</b>            | <b>S4</b>  |
| <b>3. Details for Condition Optimization</b>                       | <b>S12</b> |
| <b>4. General Procedures and Characterization Data of Products</b> | <b>S13</b> |
| <b>5. Scaled-Up Reaction</b>                                       | <b>S21</b> |
| <b>6. Synthetic Transformations</b>                                | <b>S22</b> |
| <b>7. Preliminary Result of Asymmetric Version</b>                 | <b>S24</b> |
| <b>8. Mechanistic Investigations</b>                               | <b>S26</b> |
| <b>9. Copies of NMR Spectra</b>                                    | <b>S32</b> |

## 1. General Information

**NMR spectra:**  $^1\text{H}$  NMR spectra were recorded on a 400 MHz spectrometer. Chemical shifts are reported in parts per million (ppm) and the spectra are calibrated to the resonance resulting from incomplete deuteration of the solvent ( $\text{CDCl}_3$ : 7.26 ppm).  $^{13}\text{C}$  NMR spectra were recorded on the same spectrometer with complete proton decoupling. Chemical shifts are reported in ppm with the solvent resonance as the internal standard ( $^{13}\text{CDCl}_3$ : 77.0 ppm, t). Data are reported as follows: chemical shift  $\delta$ /ppm, integration ( $^1\text{H}$  only), multiplicity (s = singlet, d = doublet, t = triplet, q = quartet, br = broad, m = multiplet or combinations thereof;  $^{13}\text{C}$  signals are singlets unless otherwise stated), coupling constants J in Hz, assignment.  $^{19}\text{F}$  NMR spectra were recorded on the same Spectrometer. All air- and moisture-sensitive reactions were performed under an atmosphere of Ar in fire dried glassware.

**High Resolution Mass Spectrometry (HRMS):** All were recorded on Bruker micrOTOF II ESI-TOF using a positive electrospray ionization (EI) or atmospheric pressure chemical ionization (APCI). Measured values are reported to 4 decimal places of the calculated value. The calculated values are based on the most abundant isotope.

**Chromatography:** Analytical thin layer chromatography was performed using Qingdao Puke Parting Materials Co. silica gel plates (Silicagel 60 F254). Visualisation was by ultraviolet fluorescence ( $\lambda = 254$  nm) and/or staining with Phosphomolybdic acid or potassium permanganate ( $\text{KMnO}_4$ ). Flash column chromatography was performed using 200-300 mesh silica gel.

**UV/Vis: Measurements** were made on a Shimadzu RF-6000 Spectro Fluorophotometer.

**Photoreactor:** The photoreactors used in this research were bought from GeAo Chem (Figure S1 and Figure S2: purple LEDs, light intensity =  $37.4$   $\text{mw}/\text{cm}^2$ , 1 W for every light bulb; every Schlenk tube was irradiated by 6 light bulbs from the side).

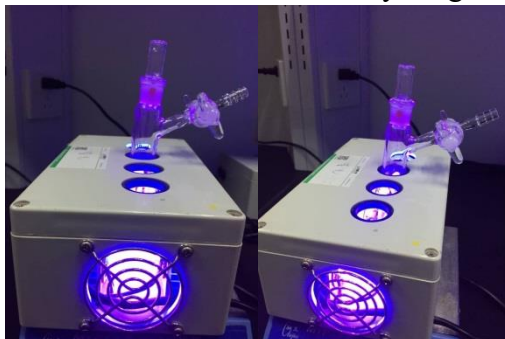

**Figure S1.** Photoreactor used in this research (2 x 3 W purple LEDs,  $\lambda_{\text{max}} = 398$  nm)

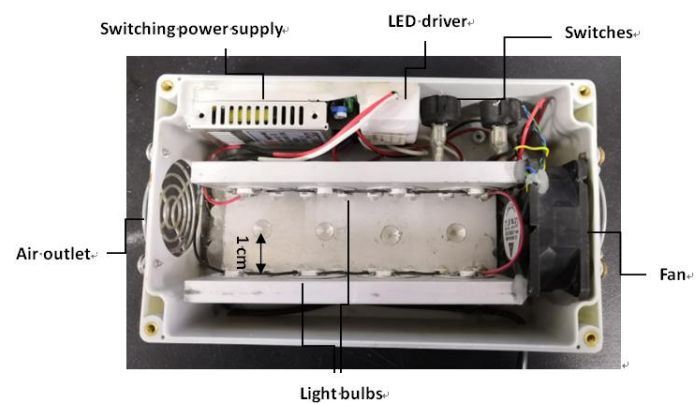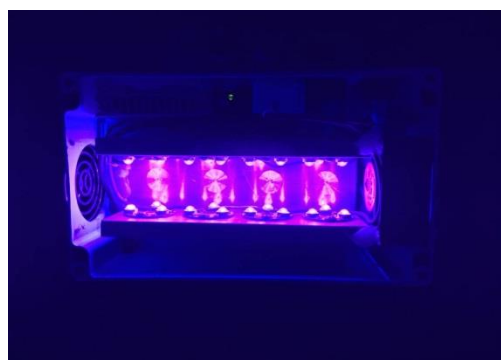

**Figure S2.** The inside structure of photoreactor

## 2. Preparation and Characterization of Materials

**Materials:** Reagents, unless otherwise stated, were used as supplied from commercial sources without further purification. Anhydrous solvent was taken from JC-Meyer solvent purification system. Ligands **L2**, **L3** were purchased from Daicel Chiral Technologies (China) Co., LTD. Ligands **L1**<sup>[1]</sup>, **L4** and photocatalysts<sup>[2]</sup> were prepared according to literature methods.

### General Procedure A:

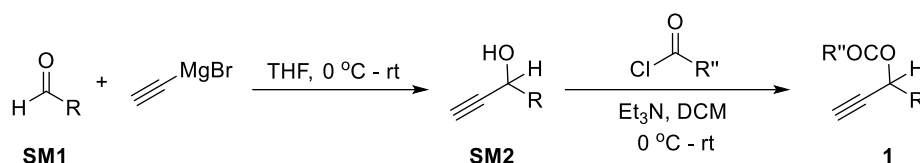

Ethynylmagnesium bromide (0.5 M in THF, 60 mL, 30 mmol, 1.5 equiv) was added to a stirred solution of aldehyde (20 mmol) in THF (20 mL) at 0 °C, and the mixture was stirred at 0 °C for 30 min, and the mixture was gradually warmed to rt. The reaction was quenched by the addition of water and extracted with ethyl acetate. The organic layer was washed with brine, dried over Na<sub>2</sub>SO<sub>4</sub>. The product was purified by flash silica gel column chromatography using (pet. ether/ethyl acetate) as eluent to afford secondary propargylic alcohol as a colorless oil.<sup>[3]</sup>

To a solution of propargyl alcohol (20 mmol) in anhydrous CH<sub>2</sub>Cl<sub>2</sub> (40 mL) was added Et<sub>3</sub>N (40 mmol, 5.58 mL, 2.0 equiv), followed by addition of 3,5-Bis(trifluoromethyl)benzoyl chloride (30 mmol, 5.44 mL, 1.5 equiv) at 0 °C. The reaction mixture was stirred at room temperature for 2 h. After completion of the reaction (TLC), the reaction was quenched with a saturated NaHCO<sub>3</sub> solution. The mixture was diluted with CH<sub>2</sub>Cl<sub>2</sub> (25 mL) and sequentially extracted with CH<sub>2</sub>Cl<sub>2</sub> (20 mL × 3). The combined organic layer was washed with brine, dried over Na<sub>2</sub>SO<sub>4</sub>. The product was purified by flash silica gel column chromatography using (pet. ether/ethyl acetate) as eluent to afford propargyl esters.<sup>[4]</sup>

### 1-Phenylprop-2-yn-1-yl 3,5-bis(trifluoromethyl)benzoate(1a)

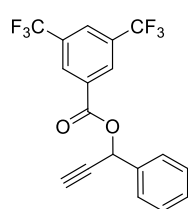

Colourless oil, 65% isolated yield, <sup>1</sup>H NMR (400 MHz, CDCl<sub>3</sub>) δ = 8.50 (s, 2H), 8.07 (s, 1H), 7.66 – 7.62 (m, 2H), 7.47 – 7.40 (m, 3H), 6.75 (d, *J* = 2.3 Hz, 1H), 2.77 (d, *J* = 2.3 Hz, 1H). <sup>13</sup>C NMR (100 MHz, CDCl<sub>3</sub>) δ = 162.8, 135.6, 132.3 (q, *J* = 34.0 Hz), 131.8, 130.0 (m), 129.0, 128.4, 127.7, 127.0, 126.7 (m), 122.8 (q, *J* = 271.0 Hz), 79.3, 76.9, 67.5. <sup>19</sup>F NMR (376 MHz, CDCl<sub>3</sub>) δ = -62.95. HRMS (EI) for

C<sub>18</sub>H<sub>10</sub>F<sub>6</sub>NaO<sub>2</sub> [M + Na]<sup>+</sup>: calcd 395.0477, found 395.0461.



### 1-(*o*-Tolyl)prop-2-yn-1-yl 3,5-bis(trifluoromethyl)benzoate (1b)

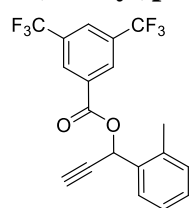

Colorless oil, 70% isolated yield,  $^1\text{H NMR}$  (400 MHz,  $\text{CDCl}_3$ )  $\delta$  = 8.50 (s, 2H), 8.08 (s, 1H), 7.76 – 7.69 (m, 1H), 7.35 – 7.29 (m, 2H), 7.25 – 7.23 (m, 1H), 6.85 (d,  $J$  = 2.4 Hz, 1H), 2.74 (d,  $J$  = 2.3 Hz, 1H), 2.48 (s, 3H).  $^{13}\text{C NMR}$  (100 MHz,  $\text{CDCl}_3$ )  $\delta$  = 162.8, 136.4 (m), 133.6, 132.3 (q,  $J$  = 33.9 Hz), 131.7, 131.03, 130.0 (m), 129.6, 128.3, 126.7 (m), 126.5, 122.8 (q,  $J$  = 271.2 Hz), 79.2, 76.5, 65.3, 19.1.  $^{19}\text{F NMR}$  ((376 MHz,  $\text{CDCl}_3$ )  $\delta$  = -62.95. HRMS (EI) for  $\text{C}_{19}\text{H}_{12}\text{F}_6\text{NaO}_2$  [ $\text{M} + \text{Na}$ ] $^+$ : calcd 409.0634, found 409.0637.

### 1-(*m*-Tolyl)prop-2-yn-1-yl 3,5-bis(trifluoromethyl)benzoate (1c)

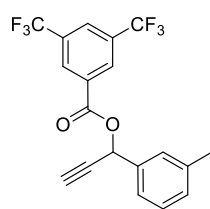

Colorless oil, 77% isolated yield,  $^1\text{H NMR}$  (400 MHz,  $\text{CDCl}_3$ )  $\delta$  = 8.50 (s, 2H), 8.07 (s, 1H), 7.44 – 7.43 (M, 2H), 7.33 (t,  $J$  = 7.9 Hz, 1H), 7.23 (d,  $J$  = 7.6 Hz, 1H), 6.71 (d,  $J$  = 2.2 Hz, 1H), 2.76 (d,  $J$  = 2.2 Hz, 1H), 2.41 (s, 3H).  $^{13}\text{C NMR}$  (100 MHz,  $\text{CDCl}_3$ )  $\delta$  = 162.8, 138.8, 135.5, 132.3 (q,  $J$  = 34.0 Hz), 131.9, 130.4, 130.0 (m), 128.8, 128.6, 126.7 (m), 125.0, 122.8 (q,  $J$  = 271.0 Hz), 79.5, 76.5, 67.3, 21.4.  $^{19}\text{F NMR}$  (376 MHz,  $\text{CDCl}_3$ )  $\delta$  = -62.94. HRMS (EI) for  $\text{C}_{19}\text{H}_{12}\text{F}_6\text{NaO}_2$  [ $\text{M} + \text{Na}$ ] $^+$ : calcd 409.0634, found 409.0633.

### 1-(*p*-Tolyl)prop-2-yn-1-yl 3,5-bis(trifluoromethyl)benzoate (1d)

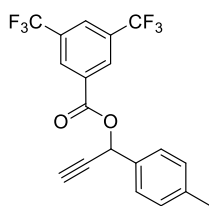

Yellow oil, 78% isolated yield,  $^1\text{H NMR}$  (400 MHz,  $\text{CDCl}_3$ )  $\delta$  = 8.49 (s, 2H), 8.06 (s, 1H), 7.53 (d,  $J$  = 8.0 Hz, 2H), 7.30 (s, 2H), 6.71 (d,  $J$  = 2.2 Hz, 1H), 2.75 (d,  $J$  = 2.2 Hz, 1H), 2.39 (s, 3H).  $^{13}\text{C NMR}$  (100 MHz,  $\text{CDCl}_3$ )  $\delta$  = 162.9, 139.7, 132.7, 132.2 (q,  $J$  = 34.1 Hz), 131.9, 130.0 (m), 129.6, 128.0, 126.7 (m), 122.8 (q,  $J$  = 271.3 Hz), 79.5, 76.38, 67.2, 21.3.  $^{19}\text{F NMR}$  (376 MHz,  $\text{CDCl}_3$ )  $\delta$  = -62.94. HRMS (EI) for  $\text{C}_{19}\text{H}_{12}\text{F}_6\text{NaO}_2$  [ $\text{M} + \text{Na}$ ] $^+$ : calcd 409.0634, found 409.0643.

### 1-(4-Bromophenyl)prop-2-yn-1-yl 3,5-bis(trifluoromethyl)benzoate (1e)

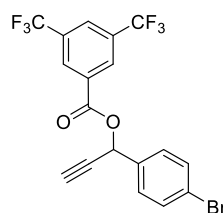

Colorless oil, 80% isolated yield,  $^1\text{H NMR}$  (400 MHz,  $\text{CDCl}_3$ )  $\delta$  = 8.48 (s, 2H), 8.08 (s, 1H), 7.58 – 7.51 (m, 4H), 6.70 (d,  $J$  = 2.3 Hz, 1H), 2.79 (d,  $J$  = 2.3 Hz, 1H).  $^{13}\text{C NMR}$  (100 MHz,  $\text{CDCl}_3$ )  $\delta$  = 162.8, 134.6, 132.4 (q,  $J$  = 34.0 Hz), 132.1, 131.6, 130.0 (m), 129.7, 126.9 (m), 123.9, 122.8 (q,  $J$  = 271.0 Hz), 78.8, 77.0, 66.6.  $^{19}\text{F NMR}$  (376 MHz,  $\text{CDCl}_3$ )  $\delta$  = -62.98. HRMS (EI) for  $\text{C}_{18}\text{H}_9\text{BrF}_6\text{NaO}_2$  [ $\text{M} + \text{Na}$ ] $^+$ : calcd 472.9582, found 472.9588.

### 1-(3-Fluorophenyl)prop-2-yn-1-yl 3,5-bis(trifluoromethyl)benzoate (1f)

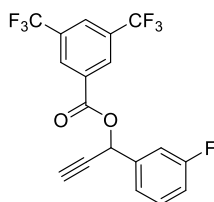

Colorless oil, 66% isolated yield,  $^1\text{H NMR}$  (400 MHz,  $\text{CDCl}_3$ )  $\delta$  = 8.50 (s, 2H), 8.09 (s, 1H), 7.45 – 7.35 (m, 3H), 7.15 – 7.10 (m, 1H), 6.73 (d,  $J$  = 2.3 Hz, 1H), 2.79 (d,  $J$  = 2.3 Hz, 1H).  $^{13}\text{C NMR}$  (100 MHz,  $\text{CDCl}_3$ )  $\delta$  = 162.9 (d,  $J$  = 246.2 Hz), 162.7, 137.9 (d,  $J$  = 7.0 Hz), 132.4 (q,  $J$  = 34.0 Hz), 131.6, 130.5 (d,  $J$  = 8.0 Hz), 130.0 (m),

126.8 (m), 124.1, 123.6 (m), 121.4, 116.6 (d,  $J = 21.2$  Hz), 115.1 (d,  $J = 23.0$  Hz), 78.8, 77.0, 66.4.  $^{19}\text{F}$  NMR (376 MHz,  $\text{CDCl}_3$ )  $\delta = -62.96, -111.65$ . HRMS (EI) for  $\text{C}_{18}\text{H}_9\text{F}_7\text{NaO}_2$   $[\text{M} + \text{Na}]^+$ : calcd 413.0383, found 413.0387.

### 1-(Naphthalen-2-yl)prop-2-yn-1-yl 3,5-bis(trifluoromethyl)benzoate (1g)

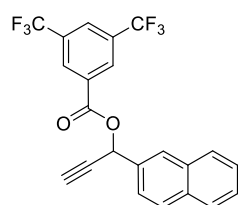

White solid, 81% isolated yield,  $^1\text{H}$  NMR (400 MHz,  $\text{CDCl}_3$ )  $\delta = 8.50$  (s, 2H), 8.12 (s, 1H), 8.07 (s, 1H), 7.94 – 7.86 (m, 3H), 7.73 – 7.70 (m, 1H), 7.56 – 5.53 (m, 2H), 6.91 (d,  $J = 2.2$  Hz, 1H), 2.83 (d,  $J = 2.3$  Hz, 1H).  $^{13}\text{C}$  NMR (100 MHz,  $\text{CDCl}_3$ )  $\delta = 162.9, 133.7, 133.0, 132.8, 132.3$  (q,  $J = 34.3$  Hz), 131.8, 130.0 (m), 129.0, 128.4, 127.8, 127.1, 126.7 (m), 124.9, 122.8 (q,  $J = 271.1$  Hz), 79.3, 76.9, 67.5.  $^{19}\text{F}$  NMR (376 MHz,  $\text{CDCl}_3$ )  $\delta = -62.94$ . HRMS (EI) for  $\text{C}_{22}\text{H}_{12}\text{F}_6\text{NaO}_2$   $[\text{M} + \text{Na}]^+$ : calcd 445.0634, found 445.0642. M.p. 79 - 82 °C.

### General Procedure B:

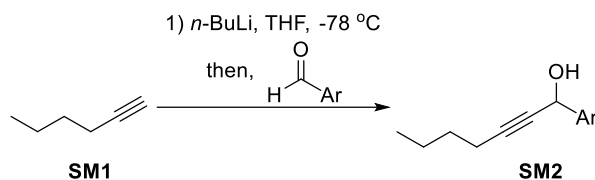

*n*-BuLi (2.4 M in hexane, 9.2 mL, 22 mmol, 1.1 equiv) was added to a stirred solution of hex-1-yne (1.64 g, 20 mmol) in THF (20 mL) at  $-78$  °C, and the mixture was stirred at  $-78$  °C for 30 min. To the resulting solution was added aldehyde (20 mmol) at  $-78$  °C, and the mixture was gradually warmed to rt. After 12 h, the reaction was quenched by the addition of water and extracted with ethyl acetate. The organic layer was washed with brine, dried over  $\text{Na}_2\text{SO}_4$ . The product was purified by flash silica gel column chromatography using (pet. ether/ethyl acetate) as eluent to afford propargylic alcohol. Then, the corresponding propargyl ester could be obtained through the second step of General Procedure A.

### 1-Phenylhept-2-yn-1-yl-3,5-bis(trifluoromethyl)benzoate (1i)

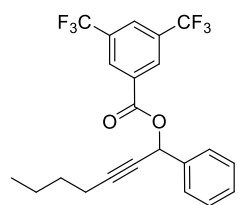

Colorless oil, 81% isolated yield,  $^1\text{H}$  NMR (400 MHz,  $\text{CDCl}_3$ )  $\delta = 8.50$  (s, 2H), 8.06 (s, 1H), 7.65 – 7.62 (m, 2H), 7.46 – 7.37 (m, 3H), 6.76 (s, 1H), 2.34 – 2.30 (m, 2H), 1.60 – 1.52 (m, 2H), 1.48 – 1.38 (m, 2H), 0.92 (t,  $J = 7.3$  Hz, 3H).  $^{13}\text{C}$  NMR (100 MHz,  $\text{CDCl}_3$ )  $\delta = 163.0, 136.8, 132.6, 132.1$  (q,  $J = 34.2$  Hz), 132.0, 131.6, 130.0 (m), 129.2, 128.7, 128.0, 126.5 (m), 122.8 (q,  $J = 271.1$  Hz), 89.7, 75.85, 68.1, 30.4, 22.0, 18.6, 13.5.  $^{19}\text{F}$  NMR (376 MHz,  $\text{CDCl}_3$ )  $\delta = -62.94$ . HRMS (EI) for  $\text{C}_{22}\text{H}_{18}\text{F}_6\text{NaO}_2$   $[\text{M} + \text{Na}]^+$ : calcd 451.1103, found 451.1098.

### 1-(Thiophen-3-yl)hept-2-yn-1-yl-3,5-bis(trifluoromethyl)benzoate (1j)

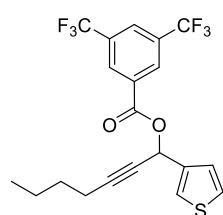

Colorless oil, 73% isolated yield,  $^1\text{H NMR}$  (400 MHz,  $\text{CDCl}_3$ )  $\delta$  = 8.50 (s, 2H), 8.06 (s, 1H), 7.57 (s, 1H), 7.36 – 7.34 (m, 1H), 7.28 – 7.26 (m, 1H), 6.80 (s, 1H), 2.34 – 2.29 (m, 2H), 1.60 – 1.52 (m, 2H), 1.50 – 1.37 (m, 2H), 0.93 (t,  $J$  = 7.3 Hz, 3H).  $^{13}\text{C NMR}$  (100 MHz,  $\text{CDCl}_3$ )  $\delta$  = 163.0, 137.8, 132.2 (q,  $J$  = 34.2 Hz), 132.1, 130.0, 126.9, 126.6, 126.5 (m), 125.3, 122.8 (q,  $J$  = 271.0 Hz), 88.8, 75.7, 63.4, 30.4, 22.0, 18.5, 13.6.  $^{19}\text{F NMR}$  (376 MHz,  $\text{CDCl}_3$ )  $\delta$  = -62.94. HRMS (EI) for  $\text{C}_{20}\text{H}_{16}\text{F}_6\text{NaO}_2\text{S}$  [ $\text{M} + \text{Na}$ ] $^+$ : calcd 457.0667, found 457.0667.

### General Procedure C:

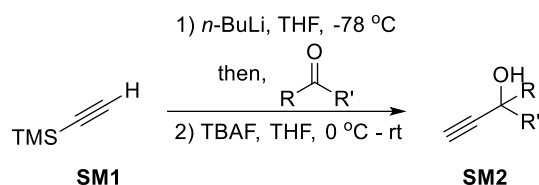

*n*-BuLi (2.4 M in hexane, 9.2 mL, 22 mmol, 1.1 equiv) was added to a stirred solution of trimethylsilylacetylene (2.04 g, 20 mmol) in THF (20 mL) at -78 °C, and the mixture was stirred at -78 °C for 30 min. To the resulting solution was added aldehyde/ketone (20 mmol) at -78 °C, and the mixture was gradually warmed to rt. The reaction was quenched by the addition of water and extracted with ethyl acetate. The organic layer was washed with brine, dried over  $\text{Na}_2\text{SO}_4$ . The solvent was removed under vacuum. Then the crude product obtained above was dissolved in THF (50 mL) and cooled to 0 °C. The resulted mixture was added TBAF (1.0 M in THF, 24.0 mL, 24 mmol, 1.2 equiv) slowly and stirred for 15 min. The reaction was quenched by the addition of water and extracted with ethyl acetate. The organic layer was washed with brine, dried over  $\text{Na}_2\text{SO}_4$ . The product was purified by flash silica gel column chromatography using (pet. ether/ethyl acetate) as eluent to afford alcohol. Then, the corresponding propargyl ester could be obtained through the second step of General Procedure A.

### 4,4-Dimethylpent-1-yn-3-yl-3,5-bis(trifluoromethyl)benzoate (1h)

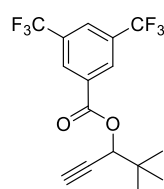

Colorless oil, 85% isolated yield,  $^1\text{H NMR}$  (400 MHz,  $\text{CDCl}_3$ )  $\delta$  = 8.54 (s, 2H), 8.14 (s, 1H), 5.44 (d,  $J$  = 2.1 Hz, 1H), 2.56 (d,  $J$  = 2.2 Hz, 1H), 1.19 (s, 9H).  $^{13}\text{C NMR}$  (100 MHz,  $\text{CDCl}_3$ )  $\delta$  = 163.0, 132.4 (q,  $J$  = 34.0 Hz), 132.2, 129.8 (m), 126.6 (m), 122.8 (q,  $J$  = 271.3 Hz), 79.0, 75.0, 73.6, 35.3, 25.6.  $^{19}\text{F NMR}$  (376 MHz,  $\text{CDCl}_3$ )  $\delta$  = -63.04. HRMS (EI) for  $\text{C}_{16}\text{H}_{14}\text{F}_6\text{NaO}_2$  [ $\text{M} + \text{Na}$ ] $^+$ : calcd 375.0790, found 375.0782.

### 3-Methyloct-1-yn-3-yl 3,5-bis(trifluoromethyl)benzoate (1k)

Colorless oil, 71% isolated yield,  $^1\text{H NMR}$  (400 MHz,  $\text{CDCl}_3$ )  $\delta$  = 8.44 (s, 2H), 8.06 (s, 1H), 2.65 (s, 1H), 2.18 – 2.10 (m, 1H), 2.02 – 1.95 (m, 1H), 1.85 (s, 3H), 1.64 – 1.52

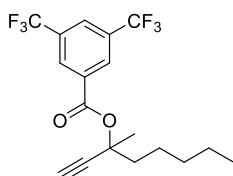

(m, 3H), 1.41 – 1.35 (m, 4H), 0.94 – 0.91 (m, 3H).  $^{13}\text{C}$  NMR (100 MHz,  $\text{CDCl}_3$ )  $\delta$  = 162.1, 133.1, 132.1 (q,  $J$  = 33.8 Hz), 130.0 (m), 126.2 (m), 122.9 (q,  $J$  = 271.9 Hz), 83.0, 77.4, 74.3, 41.3, 31.6, 26.4, 23.8, 22.5, 13.9.  $^{19}\text{F}$  NMR (376 MHz,  $\text{CDCl}_3$ )  $\delta$  = -63.01. HRMS (EI) for  $\text{C}_{18}\text{H}_{18}\text{F}_6\text{NaO}_2$  [ $\text{M} + \text{Na}$ ] $^+$ : calcd 403.1103, found 403.1114.

### 3,5-Dimethylhex-1-yn-3-yl 3,5-bis(trifluoromethyl)benzoate (1l)

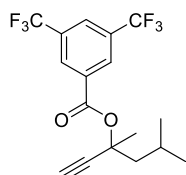

Colorless oil, 76% isolated yield,  $^1\text{H}$  NMR (400 MHz,  $\text{CDCl}_3$ )  $\delta$  = 8.46 (s, 2H), 8.06 (s, 1H), 2.67 (s, 1H), 2.12 – 2.02 (m, 2H), 1.96 – 1.90 (m, 1H), 1.87 (s, 3H), 1.09 – 1.04 (m, 6H).  $^{13}\text{C}$  NMR (100 MHz,  $\text{CDCl}_3$ )  $\delta$  = 162.1, 133.2, 132.2 (q,  $J$  = 34.0 Hz), 129.7 (m), 126.2 (m), 122.9 (q,  $J$  = 271.2 Hz), 83.1, 77.5, 74.6, 49.6, 27.1, 25.0, 24.1, 23.8.  $^{19}\text{F}$  NMR (376 MHz,  $\text{CDCl}_3$ )  $\delta$  = -63.05.  $\text{C}_{17}\text{H}_{16}\text{F}_6\text{NaO}_2$  [ $\text{M} + \text{Na}$ ] $^+$ : calcd 389.0947, found 389.0952.

### 2-Cyclohexylbut-3-yn-2-yl 3,5-bis(trifluoromethyl)benzoate (1m)

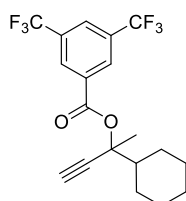

Colorless oil, 65% isolated yield,  $^1\text{H}$  NMR (400 MHz,  $\text{CDCl}_3$ )  $\delta$  = 8.44 (s, 2H), 8.06 (s, 1H), 2.65 (s, 1H), 2.12 – 2.04 (m, 2H), 1.90 – 1.85 (m, 3H), 1.82 (s, 3H), 1.74 (d,  $J$  = 12.8 Hz, 1H), 1.36 – 1.17 (m, 5H).  $^{13}\text{C}$  NMR (100 MHz,  $\text{CDCl}_3$ )  $\delta$  = 162.0, 133.3, 132.1 (q,  $J$  = 34.0 Hz), 129.6 (m), 126.2 (m), 122.9 (q,  $J$  = 271.3 Hz), 82.3, 80.8, 75.0, 46.8, 27.6, 27.1, 26.2, 26.1, 23.5.  $^{19}\text{F}$  NMR (376 MHz,  $\text{CDCl}_3$ )  $\delta$  = -63.00.  $\text{C}_{19}\text{H}_{18}\text{F}_6\text{NaO}_2$  [ $\text{M} + \text{Na}$ ] $^+$ : calcd 415.1103, found 415.1100.

### 4-Ethynylheptan-4-yl 3,5-bis(trifluoromethyl)benzoate (1n)

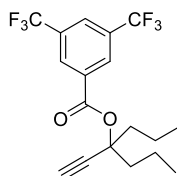

Colorless oil, 67% isolated yield,  $^1\text{H}$  NMR (400 MHz,  $\text{CDCl}_3$ )  $\delta$  = 8.43 (s, 2H), 8.06 (s, 1H), 2.66 (s, 1H), 2.21 – 2.13 (m, 2H), 2.08 – 2.00 (m, 2H), 1.61 – 1.46 (m, 4H), 0.99 (t,  $J$  = 7.4 Hz, 6H).  $^{13}\text{C}$  NMR (100 MHz,  $\text{CDCl}_3$ )  $\delta$  = 162.0, 133.1, 132.2 (q,  $J$  = 34.0 Hz), 129.6 (m), 126.3 (m), 122.9 (q,  $J$  = 271.9 Hz), 82.4, 81.0, 75.0, 40.4, 17.4, 14.0.  $^{19}\text{F}$  NMR (376 MHz,  $\text{CDCl}_3$ )  $\delta$  = -62.99. HRMS (EI) for  $\text{C}_{18}\text{H}_{18}\text{F}_6\text{NaO}_2$  [ $\text{M} + \text{Na}$ ] $^+$ : calcd 403.1103, found, 403.1102.

### 5-Chloro-3-methylpent-1-yn-3-yl 3,5-bis(trifluoromethyl)benzoate (1o)

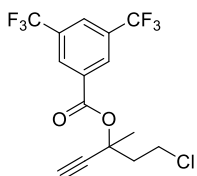

White solid, 74% isolated yield,  $^1\text{H}$  NMR (400 MHz,  $\text{CDCl}_3$ )  $\delta$  = 8.49 (s, 2H), 8.12 (s, 1H), 3.84 (t,  $J$  = 7.9 Hz, 2H), 2.77 (d,  $J$  = 2.1 Hz, 1H), 2.73 (2, 1H), 2.72 – 2.55 (m, 1H), 1.92 (s, 3H).  $^{13}\text{C}$  NMR (100 MHz,  $\text{CDCl}_3$ )  $\delta$  = 162.0, 132.6, 132.3 (q,  $J$  = 34.1 Hz), 129.7 (m), 126.5 (m), 122.8 (q,  $J$  = 271.3 Hz), 81.4, 75.7, 75.7, 44.0, 39.1, 26.8.  $^{19}\text{F}$  NMR (376 MHz,  $\text{CDCl}_3$ )  $\delta$  = -63.02. HRMS (EI) for  $\text{C}_{15}\text{H}_{11}\text{ClF}_6\text{NaO}_2$  [ $\text{M} + \text{Na}$ ] $^+$ : calcd 395.0244, found 395.0261. M.p. 37 – 39 °C.

**5-((*tert*-Butyldimethylsilyl)oxy)-3-methylpent-1-yn-3-yl 3,5-bis(trifluoromethyl)benzoate (1p)**

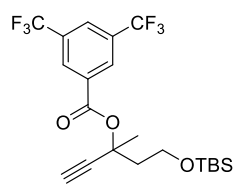

Yellow oil, 68% isolated yield,  $^1\text{H NMR}$  (400 MHz,  $\text{CDCl}_3$ )  $\delta$  = 8.44 (s, 2H), 8.06 (s, 1H), 3.99 – 3.91 (m, 2H), 2.68 (s, 1H), 2.44 – 2.37 (m, 1H), 2.32 – 2.25 (m, 1H), 1.90 (s, 3H), 0.89 (s, 9H), 0.06 (s, 6H).  $^{13}\text{C NMR}$  (100 MHz,  $\text{CDCl}_3$ )  $\delta$  = 162.0, 133.0, 132.3 (q,  $J$  = 34.0 Hz), 129.7(m), 126.3 (m), 122.8 (q,  $J$  = 271.0 Hz), 82.5, 76.1, 74.8, 59.1, 43.5, 27.2, 25.8, 18.3, -5.5.  $^{19}\text{F NMR}$  (376 MHz,  $\text{CDCl}_3$ )  $\delta$  = -62.98. HRMS (EI) for  $\text{C}_{21}\text{H}_{26}\text{F}_6\text{O}_3\text{NaSi}$  [ $\text{M} + \text{Na}$ ] $^+$ : calcd 491.1448, found 491.1438.

**5,5-Dimethoxy-3-methylpent-1-yn-3-yl 3,5-bis(trifluoromethyl)benzoate (1q)**

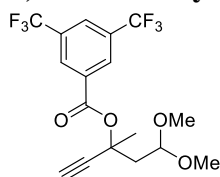

light yellow crystal, 79% isolated yield,  $^1\text{H NMR}$  (400 MHz,  $\text{CDCl}_3$ )  $\delta$  = 8.49 (s, 2H), 8.07 (s, 1H), 4.82 (t,  $J$  = 4.9 Hz, 1H), 3.36 (s, 6H), 2.74 (s, 1H), 2.54 – 2.49 (m, 1H), 2.37 – 2.32 (m, 1H), 1.92 (s, 3H).  $^{13}\text{C NMR}$  (100 MHz,  $\text{CDCl}_3$ )  $\delta$  = 162.0, 133.0, 132.3 (q,  $J$  = 34.2 Hz), 129.7 (m), 126.2 (m), 122.8 (q,  $J$  = 271.0 Hz), 101.74, 82.39, 74.93, 74.87, 52.91, 52.75, 43.72, 27.12.  $^{19}\text{F NMR}$  (376 MHz,  $\text{CDCl}_3$ )  $\delta$  = -63.00. HRMS (EI) for  $\text{C}_{17}\text{H}_{16}\text{F}_6\text{NaO}_4$  [ $\text{M} + \text{Na}$ ] $^+$ : calcd 421.0845, found 421.0848. M.p. 40 – 43 °C.

**1-Ethynylcyclohexyl 3,5-bis(trifluoromethyl)benzoate (1r)**

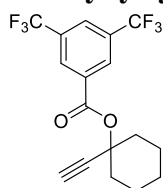

Yellow oil, 80% isolated yield,  $^1\text{H NMR}$  (400 MHz,  $\text{CDCl}_3$ )  $\delta$  = 8.47 (s, 2H), 8.06 (s, 1H), 2.70 (s, 1H), 2.35 – 2.29 (m, 2H), 2.09 – 2.03 (m, 2H), 1.76 – 1.70 (m, 4H), 1.63 – 1.58 (m, 1H), 1.46 – 1.38 (m, 1H).  $^{13}\text{C NMR}$  (100 MHz,  $\text{CDCl}_3$ )  $\delta$  = 161.9, 133.1, 132.3 (q,  $J$  = 34.0 Hz), 129.7 (m), 126.2 (m), 122.8 (q,  $J$  = 271.1 Hz), 82.7, 77.6, 75.3, 37.0, 25.0, 22.6.  $^{19}\text{F NMR}$  (376 MHz,  $\text{CDCl}_3$ )  $\delta$  = -62.98. HRMS (EI) for  $\text{C}_{17}\text{H}_{14}\text{F}_6\text{NaO}_2$  [ $\text{M} + \text{Na}$ ] $^+$ : calcd 387.0790, found 387.0790.

**2-Ethynyl-1,2,3,4-tetrahydronaphthalen-2-yl 3,5-bis(trifluoromethyl)benzoate (1s)**

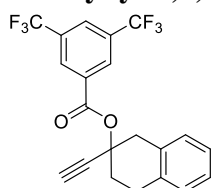

Pink solid, 71% isolated yield,  $^1\text{H NMR}$  (400 MHz,  $\text{CDCl}_3$ )  $\delta$  = 8.40 (s, 2H), 8.04 (s, 1H), 7.21 – 7.09 (m, 4H), 3.69 – 3.48 (m, 2H), 3.18 – 3.10 (m, 1H), 3.03 – 2.96 (m, 1H), 2.65 (s, 1H), 2.60 – 2.48 (m, 2H).  $^{13}\text{C NMR}$  (100 MHz,  $\text{CDCl}_3$ )  $\delta$  = 162.2, 134.2, 132.1 (q,  $J$  = 34.1 Hz), 131.9, 129.7 (m), 129.2, 128.5, 126.60, 126.4 (m), 126.3, 122.8 (q,  $J$  = 271.3 Hz), 82.0, 75.4, 75.0, 41.0, 33.5, 26.2.  $^{19}\text{F NMR}$  (376 MHz,  $\text{CDCl}_3$ )  $\delta$  = -63.01. HRMS (EI) for  $\text{C}_{21}\text{H}_{14}\text{F}_6\text{NaO}_4$  [ $\text{M} + \text{Na}$ ] $^+$ : calcd 435.0790, found 435.0788. M.p. 81 – 86 °C.

**1-Ethynylcycloheptyl 3,5-bis(trifluoromethyl)benzoate (1t)**

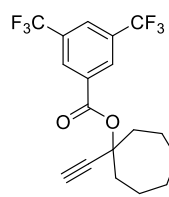
 Yellow oil, 83% isolated yield,  $^1\text{H NMR}$  (400 MHz,  $\text{CDCl}_3$ )  $\delta$  = 8.46 (s, 2H), 8.06 (s, 1H), 2.69 (s, 1H), 2.48 – 2.41 (m, 2H), 2.36 – 2.25 (m, 2H), 1.77 – 1.60 (m, 8H).  $^{13}\text{C NMR}$  (100 MHz,  $\text{CDCl}_3$ )  $\delta$  = 162.0, 133.2, 132.1 (q,  $J$  = 34.0 Hz), 129.7 (m), 126.2 (m), 122.8 (q,  $J$  = 271.3 Hz), 83.9, 81.0, 74.5, 40.2, 28.2, 22.2.  $^{19}\text{F NMR}$  (376 MHz,  $\text{CDCl}_3$ )  $\delta$  = -62.99. HRMS (EI) for  $\text{C}_{18}\text{H}_{16}\text{F}_6\text{NaO}_4$   $[\text{M} + \text{Na}]^+$ : calcd 401.0947, found 401.0948.

### 3-Ethynyl-2-methyltetrahydrofuran-3-yl 3,5-bis(trifluoromethyl)benzoate (1u)

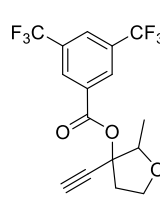
 White solid, 62% isolated yield, d.r. = 6:1,  $^1\text{H NMR}$  (400 MHz,  $\text{CDCl}_3$ )  $\delta$  = 8.47 (s, 2H, major), 8.46 (s, 2H, minor), 8.09 (s, 1H, major+minor), 4.31 (q,  $J$  = 8.0 Hz, 1 H, minor), 4.15 – 3.90 (m, 3H, major+minor), 2.86 – 2.68 (m, 3H, major+minor), 1.54 (d,  $J$  = 8.0 Hz, 3H, major), 1.50 (d,  $J$  = 8.0 Hz, 3H, minor).  $^{13}\text{C NMR}$  (100 MHz,  $\text{CDCl}_3$ )  $\delta$  = 162.4, 162.3, 132.5 (m), 132.2 (q,  $J$  = 34.1 Hz), 129.7 (m), 126.7 (m), 122.8 (q,  $J$  = 272.0 Hz), 83.8, 83.4, 82.1, 80.4, 79.6, 79.1, 77.4, 77.2, 76.8, 75.7, 65.9, 65.7, 40.4, 39.7, 17.8, 13.4.  $^{19}\text{F NMR}$  (376 MHz,  $\text{CDCl}_3$ )  $\delta$  = -63.06. HRMS (EI) for  $\text{C}_{16}\text{H}_{12}\text{F}_6\text{NaO}_3$   $[\text{M} + \text{Na}]^+$ : calcd 389.0583, found 389.0608. M.p. 78 - 83 °C.

### 4-Ethynyltetrahydro-2H-pyran-4-yl 3,5-bis(trifluoromethyl)benzoate (1v)

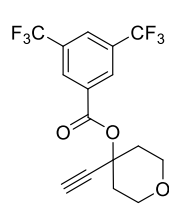
 Colorless oil, 74% isolated yield,  $^1\text{H NMR}$  (400 MHz,  $\text{CDCl}_3$ )  $\delta$  = 8.46 (d,  $J$  = 1.6 Hz, 2H), 8.08 (s, 1H), 3.95 (dt,  $J$  = 12.2, 4.3 Hz, 2H), 3.82 (m, 2H), 2.78 (s, 1H), 2.44 (m, 2H), 2.21 (m, 2H).  $^{13}\text{C NMR}$  (100 MHz,  $\text{CDCl}_3$ )  $\delta$  = 161.9, 132.6, 132.2 (q,  $J$  = 34.0 Hz), 129.7 (m), 126.5 (m), 122.8 (q,  $J$  = 272.1 Hz), 81.3, 76.4, 74.7, 64.4, 37.4.  $^{19}\text{F NMR}$  (376 MHz,  $\text{CDCl}_3$ )  $\delta$  = -62.99. HRMS (EI) for  $\text{C}_{16}\text{H}_{12}\text{F}_6\text{NaO}_3$   $[\text{M} + \text{Na}]^+$ : calcd 389.0583, found 389.0571.

### 8-Ethynyl-1,4-dioxaspiro[4.5]decan-8-yl 3,5-bis(trifluoromethyl)benzoate (1w)

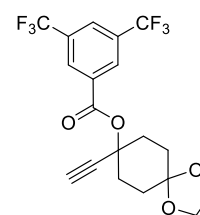
 Colorless oil, 75% isolated yield,  $^1\text{H NMR}$  (400 MHz,  $\text{CDCl}_3$ )  $\delta$  = 8.45 (d,  $J$  = 1.7 Hz, 2H), 8.07 (s, 1H), 3.98 (m, 4H), 2.70 (s, 1H), 2.39 (m, 4H), 1.87 (m, 4H).  $^{13}\text{C NMR}$  (100 MHz,  $\text{CDCl}_3$ )  $\delta$  = 162.0, 132.8, 132.2 (q,  $J$  = 34.1 Hz), 129.7 (m), 126.4 (m), 122.8 (q,  $J$  = 271.9 Hz), 107.2, 81.8, 76.0, 75.4, 64.5, 64.4, 34.4, 31.1.  $^{19}\text{F NMR}$  (376 MHz,  $\text{CDCl}_3$ )  $\delta$  = -63.00. HRMS (EI) for  $\text{C}_{19}\text{H}_{16}\text{F}_6\text{NaO}_4$   $[\text{M} + \text{Na}]^+$ : calcd 445.0845, found 445.0855.

### (1S,2R,4S)-2-Ethynyl-1,7,7-trimethylbicyclo[2.2.1]heptan-2-yl 3,5-bis (trifluoromethyl) benzoate (1x)

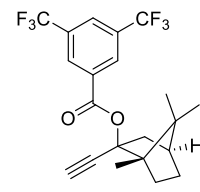
 Colorless oil, 60% isolated yield,  $^1\text{H NMR}$  (400 MHz,  $\text{CDCl}_3$ )  $\delta$  = 8.43 (s, 2H), 8.06 (s, 1H), 2.60 – 2.55 (m, 2H), 2.27 (d,  $J$  = 14.7 Hz, 1H), 2.19 – 2.13 (m, 1H), 1.86 (t,  $J$  = 4.4 Hz, 1H), 1.81 – 1.73 (m, 1H), 1.63 – 1.57 (m, 1H), 1.30 – 1.24 (m, 1H), 1.18 (s, 3H), 1.03 (s, 3H), 0.99 (s, 3H).  $^{13}\text{C NMR}$  (100 MHz,  $\text{CDCl}_3$ )  $\delta$  = 161.6, 133.3, 132.2 (q,

$J = 34.2$  Hz), 129.5 (m), 126.30 (m), 122.8 (q,  $J = 271.9$  Hz), 85.5, 82.6, 73.7, 54.7, 48.4, 46.8, 45.4, 32.0, 26.3, 21.2, 20.7, 11.0.  **$^{19}\text{F}$  NMR** (376 MHz,  $\text{CDCl}_3$ )  $\delta = -62.97$ . HRMS (EI) for  $\text{C}_{21}\text{H}_{20}\text{F}_6\text{NaO}_2$   $[\text{M} + \text{Na}]^+$ : calcd 441.1260, found 441.1244.

## References

- [1] (a) C. Liu, J.-C. Yi, Z.-B. Zheng, Y. Tang, L.-X. Dai, S.-L. You, *Angew. Chem. Int. Ed.* 2016, **55**, 751 – 754. (b) N. V. Hanhan, N. R. Ball-Jones, N. T. Tran, A. K. Franz, *Angew. Chem. Int. Ed.* 2012, **51**, 989 – 992.
- [2] X.-C. Pan, C. Fang, M. Fantin, N. Malhotra, W. Y. So, L. A. Peteanu, A. A. Isse, A. Gennaro, P. Liu, K. Matyjaszewski, *J. Am. Chem. Soc.* 2016, **138**, 2411 – 2425.
- [3] F. Schömberg, Y. Zi, I. Vilotijevic, *Chem. Commun.* 2018, **54**, 3266 – 3269.
- [4] D. Rackl, V. Kais, Peter. Kreitmeier, O. Reiser, *Beilstein J. Org. Chem.* 2014, **10**, 2157 – 2165.

### 3. Details for Condition Optimization

**Table S1. The effect of copper salts<sup>a</sup>**

**Ph-PTZ**

**L1**

**Ax**

| Entry | Cu Salt                               | Yield/% <sup>b</sup> |
|-------|---------------------------------------|----------------------|
| 1     | CuBr                                  | 65                   |
| 2     | Cu(MeCN) <sub>4</sub> BF <sub>4</sub> | 83                   |
| 3     | Cu(MeCN) <sub>4</sub> PF <sub>6</sub> | 70                   |
| 4     | Cu(OAc)                               | Trace                |
| 5     | Cu(OTf) <sub>2</sub>                  | 73                   |

<sup>a</sup>**1a** (0.2 mmol), **2** (0.6 mmol, 3 equiv), Cu salt (0.01 mmol, 5 mol%), chiral ligand **L1** (0.012 mmol, 6 mol%) and organic photocatalyst **Ph-PTZ** (0.01 mmol, 5 mol%) in 2.0 mL of DMF for 24 h under the irradiation of 2 x 3 W purple LEDs. <sup>b</sup><sup>1</sup>HNMR yield using 1,3,5-trimethoxybenzene as an internal standard.

**Table S2. The effect of solvents<sup>a</sup>**

| Entry          | Solvent | Yield/% <sup>b</sup> |
|----------------|---------|----------------------|
| 1              | THF     | 42                   |
| 2 <sup>e</sup> | DCM     | 36                   |
| 3              | MeCN    | 42                   |
| 4              | DMF     | 83                   |
| 5              | MeOH    | 18                   |

<sup>a</sup>**1a** (0.2 mmol), **2** (0.6 mmol, 3 equiv), Cu salt (0.01 mmol, 5 mol%), chiral ligand **L1** (0.012 mmol, 6 mol%) and organic photocatalyst **Ph-PTZ** (0.01 mmol, 5 mol%) in 2.0 mL of solvent for 24 h under the irradiation of 2 x 3 W purple LEDs. <sup>b</sup><sup>1</sup>HNMR yield using 1,3,5-trimethoxybenzene as an internal standard.



## 4. General Procedures and Characterization Data of Products

### 4.1 General Procedures

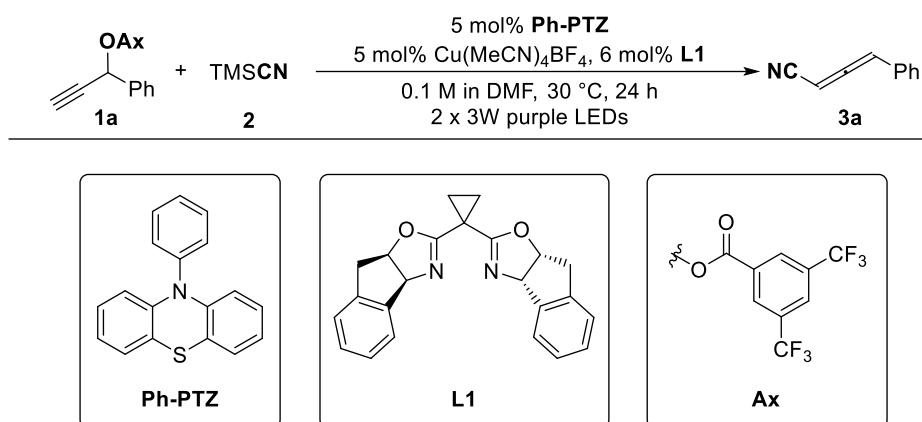

**General procedure D:** In an argon-filled glove box, a flame-dried 10 ml Schlenk tube equipped with a magnetic stirrer bar was charged sequentially with **Cu(CH<sub>3</sub>CN)<sub>4</sub>BF<sub>4</sub>** (3.15 mg, 0.01 mmol) and **L1** (4.28 mg, 0.012 mmol), followed by the addition of DMF (0.5 mL). Then the mixture was stirred at room temperature for 30 min. The vial was closed and the Schlenk tube was removed from the glove box, to the resulting mixture were added propargyl ester **1** (0.20 mmol), DMF (1.5 mL) and organic photocatalyst **Ph-PTZ** (0.01 mmol). Then, the resulting mixture was degassed via ‘freeze-pump-thaw’ procedure (3 times) under argon atmosphere. After that, **TMSCN** (0.6mmol) was added into the mixture. At last, the mixture was stirred at a distance of ~1 cm from a 2 x 3 W purple LEDs at 30 °C about 24 h until the reaction was completed, as monitored by TLC analysis. Then the reaction was quenched by the addition of water and extracted with ethyl acetate. The organic layer was washed with brine, dried over Na<sub>2</sub>SO<sub>4</sub>. The product was purified by flash column chromatography on silica gel (petrol ether/ EtOAc = 100/1) to afford the desired product. Note: Products **3a** to **3h** are extremely unstable at room temperature and the temperature should not exceed 20 °C when the solvent is removed under vacuum.

### 4.2 Characterization Data of Products

#### 4-Phenylbuta-2,3-dienitrile (**3a**)

83% (23.4 mg) isolated yield, light yellow oil, <sup>1</sup>H NMR (400 MHz, CDCl<sub>3</sub>) δ = 7.40 – 7.29 (m, 5H), 6.72 (d, *J* = 6.7 Hz, 1H), 5.67 (d, *J* = 6.7 Hz, 1H). <sup>13</sup>C NMR (100 MHz, CDCl<sub>3</sub>) δ = 217.8, 129.3, 129.1, 128.2, 127.9, 112.5, 100.0, 71.3. HRMS (EI) for C<sub>10</sub>H<sub>11</sub>N<sub>2</sub> [M+NH<sub>4</sub>]<sup>+</sup>: calcd 159.0917, found 159.0919. IR ν<sub>max</sub>/cm<sup>-1</sup> (in CHCl<sub>3</sub>): 3006; 2923; 2360; 2226; 1949; 1733; 1495; 1459; 1280; 1241; 1140; 913; 869; 773; 692.

#### 4-(*o*-Tolyl)buta-2,3-dienitrile (**3b**)

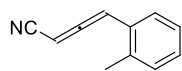

82% (25.5 mg) isolated yield, light yellow oil,  $^1\text{H NMR}$  (400 MHz,  $\text{CDCl}_3$ )  $\delta = 7.30 - 7.28$  (m, 1H),  $7.24 - 7.18$  (m, 3H),  $6.91$  (d,  $J = 6.8$  Hz, 1H),  $5.63$  (d,  $J = 6.7$  Hz, 1H),  $2.38$  (s, 3H).  $^{13}\text{C NMR}$  (100 MHz,  $\text{CDCl}_3$ )  $\delta = 218.3, 136.3, 130.9, 129.0, 128.6, 127.9, 126.6, 112.8, 97.5, 70.4, 20.0$ . HRMS (EI) for  $\text{C}_{11}\text{H}_{13}\text{N}_2$   $[\text{M}+\text{NH}_4]^+$ : calcd 173.1073, found 173.1069. IR  $\nu_{\text{max}}/\text{cm}^{-1}$  (in  $\text{CHCl}_3$ ): 3006; 2981; 2872; 2226; 1945; 1736; 1460; 1282; 1240; 1142; 1045; 931; 769; 741.

#### 4-(*m*-Tolyl)buta-2,3-dienitrile (3c)

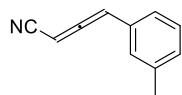

88% (27.3 mg) isolated yield, light yellow oil,  $^1\text{H NMR}$  (400 MHz,  $\text{CDCl}_3$ )  $\delta = 7.27 - 7.25$  (m, 1H),  $7.15 - 7.08$  (m, 3H),  $6.68$  (d,  $J = 6.7$  Hz, 1H),  $5.67$  (d,  $J = 6.7$  Hz, 1H),  $2.36$  (s, 3H).  $^{13}\text{C NMR}$  (100 MHz,  $\text{CDCl}_3$ )  $\delta = 217.9, 138.9, 129.9, 129.2, 129.0, 128.5, 125.1, 112.6, 100.0, 71.2, 21.3$ . HRMS (EI) for  $\text{C}_{11}\text{H}_{13}\text{N}_2$   $[\text{M}+\text{NH}_4]^+$ : calcd 173.1073, found 173.1080. IR  $\nu_{\text{max}}/\text{cm}^{-1}$  (in  $\text{CHCl}_3$ ): 2998; 2360; 2229; 1949; 1742; 1588; 1487; 1280; 1238; 1070; 1009; 871; 827; 749.

#### 4-(*p*-Tolyl)buta-2,3-dienitrile (3d)

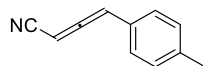

95% (29.5 mg) isolated yield, light yellow oil,  $^1\text{H NMR}$  (400 MHz,  $\text{CDCl}_3$ )  $\delta = 7.18$  (s, 4H),  $6.69$  (d,  $J = 6.7$  Hz, 1H),  $5.65$  (d,  $J = 6.7$  Hz, 1H),  $2.36$  (s, 3H).  $^{13}\text{C NMR}$  (100 MHz,  $\text{CDCl}_3$ )  $\delta = 218.0, 139.2, 129.8, 127.8, 126.2, 112.7, 99.8, 71.1, 21.3$ . HRMS (EI) for  $\text{C}_{11}\text{H}_{13}\text{N}_2$   $[\text{M}+\text{NH}_4]^+$ : calcd 173.1073, found 173.1070. IR  $\nu_{\text{max}}/\text{cm}^{-1}$  (in  $\text{CHCl}_3$ ): 3006; 2923; 2850; 2363; 2231; 1949; 1730; 1591; 1490; 1448; 1283; 1140; 877; 787; 745; 681.

#### 4-(4-Bromophenyl)buta-2,3-dienitrile (3e)

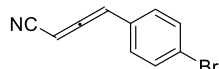

78% (34.3 mg) isolated yield, light yellow oil,  $^1\text{H NMR}$  (400 MHz,  $\text{CDCl}_3$ )  $\delta = 7.50$  (d,  $J = 8.0$  Hz, 2H),  $7.17$  (d,  $J = 8.1$  Hz, 2H),  $6.67$  (d,  $J = 6.6$  Hz, 1H),  $5.69$  (d,  $J = 6.7$  Hz, 1H).  $^{13}\text{C NMR}$  (100 MHz,  $\text{CDCl}_3$ )  $\delta = 217.7, 132.3, 129.3, 128.3, 123.1, 112.1, 99.2, 71.8$ . HRMS (EI) for  $\text{C}_{10}\text{H}_{10}\text{BrN}_2$   $[\text{M}+\text{NH}_4]^+$ : calcd 237.0022, found 237.0031. IR  $\nu_{\text{max}}/\text{cm}^{-1}$  (in  $\text{CHCl}_3$ ): 2925, 2219, 1947, 1586, 1486, 1438, 1069, 1009, 878, 818, 670, 496.

#### 4-(3-Fluorophenyl)buta-2,3-dienitrile (3f)

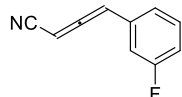

71% (22.6 mg) isolated yield, light yellow oil,  $^1\text{H NMR}$  (400 MHz,  $\text{CDCl}_3$ )  $\delta = 7.39 - 7.32$  (m, 1H),  $7.10 - 6.99$  (m, 3H),  $6.63$  (d,  $J = 6.7$  Hz, 1H),  $5.64$  (d,  $J = 6.7$  Hz, 1H).  $^{13}\text{C NMR}$  (100 MHz,  $\text{CDCl}_3$ )  $\delta = 217.7, 163.0$  (d,  $J = 246.0$  Hz),  $131.6$  (d,  $J = 7.8$  Hz),  $130.7$  (d,  $J = 7.7$  Hz),  $123.7$  (d,  $J = 2.9$  Hz),  $116.1$  (d,  $J = 21.2$  Hz),  $114.6$  (d,  $J = 20.0$  Hz),  $112.1, 99.3$  (d,  $J = 2.9$  Hz),  $71.8$ .  $^{19}\text{F NMR}$  (376 MHz,  $\text{CDCl}_3$ )  $\delta = -111.98$ . HRMS (EI) for  $\text{C}_{10}\text{H}_{10}\text{FN}_2$   $[\text{M}+\text{NH}_4]^+$ : calcd 177.0823, found 177.0819. IR  $\nu_{\text{max}}/\text{cm}^{-1}$  (in  $\text{CHCl}_3$ ): 2959, 2929, 2867, 2219, 1970, 1601, 1508, 1227, 1157, 833, 516

#### 4-(Naphthalen-2-yl)buta-2,3-dienenitrile (3g)

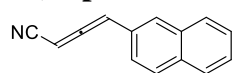

71% (27.2 mg) isolated yield, white solid,  $^1\text{H NMR}$  (400 MHz,  $\text{CDCl}_3$ )  $\delta = 7.84 - 7.80$  (m, 3H), 7.72 (s, 1H), 7.53 – 7.48 (m, 2H), 7.41 – 7.38 (m, 1H), 6.80 (d,  $J = 6.7$  Hz, 1H), 5.67 (d,  $J = 6.6$  Hz, 1H).  $^{13}\text{C NMR}$  (100 MHz,  $\text{CDCl}_3$ )  $\delta = 218.4, 133.4, 129.0, 128.0, 127.8, 127.7, 126.9, 126.8, 126.7, 124.6, 112.6, 100.3, 71.6$ . HRMS (EI) for  $\text{C}_{14}\text{H}_{13}\text{N}_2$   $[\text{M}+\text{NH}_4]^+$ : calcd 209.1073, found 209.1066. IR  $\nu_{\text{max}}/\text{cm}^{-1}$  (in  $\text{CHCl}_3$ ): 3055; 2924; 2368; 2215; 1600; 1508; 1367; 1271; 816; 743. We cannot provide the melting point for **3g** because this compound was not stable under heating condition.

#### 5,5-Dimethylhexa-2,3-dienenitrile (3h)

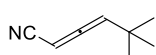

92% (22.3 mg) isolated yield, colorless oil,  $^1\text{H NMR}$  (400 MHz,  $\text{CDCl}_3$ )  $\delta = 5.70$  (d,  $J = 6.5$  Hz, 1H), 5.26 (d,  $J = 6.4$  Hz, 1H), 1.12 (s, 9H).  $^{13}\text{C NMR}$  (100 MHz,  $\text{CDCl}_3$ )  $\delta = 213.2, 113.9, 108.0, 68.5, 32.8, 29.6$ . HRMS (EI) for  $\text{C}_8\text{H}_{15}\text{N}_2$   $[\text{M}+\text{NH}_4]^+$ : calcd 139.1230, found 139.1235. IR  $\nu_{\text{max}}/\text{cm}^{-1}$  (in  $\text{CHCl}_3$ ): 2968; 2228; 1958; 1473; 1398; 1368; 1249; 1180; 1189; 913; 872; 717.

#### 2-(2-Phenylvinylidene)hexanenitrile (3i)

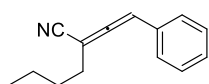

68% (26.8 mg) isolated yield, light yellow oil, 6 mol% dtbpy instead of L1 as ligand.  $^1\text{H NMR}$  (400 MHz,  $\text{CDCl}_3$ )  $\delta = 7.39 - 7.25$  (m, 5H), 6.59 (t,  $J = 2.9$  Hz, 1H), 2.36 – 2.31 (m, 2H), 1.65 – 1.53 (m, 2H), 1.48 – 1.34 (m, 2H), 0.93 (t,  $J = 7.3$  Hz, 3H).  $^{13}\text{C NMR}$  (100 MHz,  $\text{CDCl}_3$ )  $\delta = 213.2, 130.7, 129.0, 128.7, 127.7, 114.9, 99.6, 86.2, 31.3, 29.6, 21.8, 13.6$ . HRMS (APCI) for  $\text{C}_{14}\text{H}_{15}\text{N}$   $[\text{M}]^+$ : calcd 197.1199, found 197.1196. IR  $\nu_{\text{max}}/\text{cm}^{-1}$  (in  $\text{CHCl}_3$ ): 2958; 2924; 2219; 1944; 1600; 1495; 1367; 829; 750; 692.

#### 2-(2-(Thiophen-3-yl)vinylidene)hexanenitrile (3j)

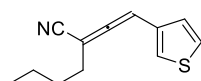

70% (28.5 mg) isolated yield, light yellow oil, 6 mol% dtbpy instead of L1 as ligand.  $^1\text{H NMR}$  (400 MHz,  $\text{CDCl}_3$ )  $\delta = 7.35 - 7.33$  (m, 1H), 7.25 – 7.21 (m, 1H), 7.03 (d,  $J = 4.0$ , 1H), 6.66 (t,  $J = 2.9$  Hz, 1H), 2.33 – 2.29 (m, 2H), 1.63 – 1.52 (m, 2H), 1.47 – 1.35 (m, 2H), 0.93 (t,  $J = 7.3$  Hz, 3H).  $^{13}\text{C NMR}$  (100 MHz,  $\text{CDCl}_3$ )  $\delta = 213.7, 131.4, 126.8, 126.1, 124.0, 114.9, 94.0, 85.4, 31.4, 29.6, 21.8, 13.7$ . HRMS (APCI) for  $\text{C}_{12}\text{H}_{13}\text{NS}$   $[\text{M}]^+$ : calcd 203.0763, found 203.0760. IR  $\nu_{\text{max}}/\text{cm}^{-1}$  (in  $\text{CHCl}_3$ ): 2958; 2928; 2855; 2215; 1944; 1600; 1462; 1379; 1238; 1146; 1081; 864; 831; 772; 620.

#### 4-Methylnona-2,3-dienenitrile (3k)

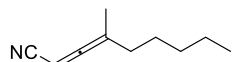

92% (27.5 mg) isolated yield, colorless oil,  $^1\text{H NMR}$  (400 MHz,  $\text{CDCl}_3$ )  $\delta = 5.14 - 5.10$  (m, 1H), 2.08 – 2.03 (m, 2H), 1.79 (d,  $J = 2.9$  Hz, 3H), 1.49 – 1.41 (m, 2H), 1.36 – 1.25 (m, 4H), 0.92 – 0.88 (m, 3H).  $^{13}\text{C NMR}$  (100 MHz,  $\text{CDCl}_3$ )  $\delta = 213.4, 114.4, 106.6, 66.1, 32.9, 31.2, 26.5, 22.3, 17.7, 14.0$ . HRMS (EI) for  $\text{C}_{10}\text{H}_{19}\text{N}_2$   $[\text{M}+\text{NH}_4]^+$ : calcd 167.1543, found 167.1531. IR  $\nu_{\text{max}}/\text{cm}^{-1}$  (in

CHCl<sub>3</sub>): 2956; 2929; 2872; 2860; 2223; 1962; 1739; 1653; 1458; 1394; 1378; 1281; 1259; 767.

#### 4,6-Dimethylhepta-2,3-dienitrile (3l)

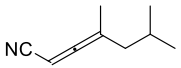 87% (23.5 mg) isolated yield, colorless oil, <sup>1</sup>H NMR (400 MHz, CDCl<sub>3</sub>) δ = 5.12 -5.09 (m, 1H), 1.96 -1.93 (m, 2H), 1.82 - 1.74 (m, 4H), 0.94 (d, *J* = 6.6 Hz, 6H). <sup>13</sup>C NMR (100 MHz, CDCl<sub>3</sub>) δ = 213.8, 114.4, 105.2, 65.6, 42.4, 26.2, 22.3, 17.7. HRMS (EI) for C<sub>9</sub>H<sub>17</sub>N<sub>2</sub> [M+NH<sub>4</sub>]<sup>+</sup>: calcd 153.1386, found 153.1387. IR ν<sub>max</sub>/cm<sup>-1</sup> (in CHCl<sub>3</sub>): 2959; 2927; 2872; 2856; 2361; 2340; 2326; 2211; 1738; 1465; 1386; 1280.523; 1259; 1047; 739.

#### 4-Cyclohexylpenta-2,3-dienitrile (3m)

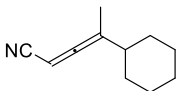 87% (28.1 mg) isolated yield, colorless oil, <sup>1</sup>H NMR (400 MHz, CDCl<sub>3</sub>) δ = 5.15 - 5.12 (m, 1H), 1.93 - 1.76 (m, 8H), 1.70 - 1.65 (m, 1H), 1.34 - 1.06 (m, 5H). <sup>13</sup>C NMR (100 MHz, CDCl<sub>3</sub>) δ = 213.2, 114.7, 111.4, 66.7, 41.1, 31.2, 26.1, 26.0, 16.1. HRMS (EI) for C<sub>11</sub>H<sub>15</sub>KN [M+K]<sup>+</sup>: calcd 200.0836, found 200.0832. IR ν<sub>max</sub>/cm<sup>-1</sup> (in CHCl<sub>3</sub>): 2925; 2856; 2223; 1956; 1449; 1393; 1368; 889; 778; 733.

#### 4-Propylhepta-2,3-dienitrile (3n)

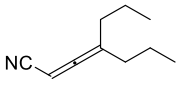 88% (26.3 mg) isolated yield, colorless oil, <sup>1</sup>H NMR (400 MHz, CDCl<sub>3</sub>) δ = 5.19 - 5.15 (m, 1H), 2.05 - 2.01 (m, 4H), 1.52 - 1.43 (m, 4H), 0.94 (t, *J* = 7.4 Hz, 6H). <sup>13</sup>C NMR (100 MHz, CDCl<sub>3</sub>) δ = 213.3, 114.5, 111.0, 67.4, 33.7, 20.36, 13.6. HRMS (EI) for C<sub>10</sub>H<sub>15</sub>NNa [M+Na]<sup>+</sup>: calcd 172.1097, found 172.1115. IR ν<sub>max</sub>/cm<sup>-1</sup> (in CHCl<sub>3</sub>): 2926; 2854; 1957; 1449; 1390; 1371; 890; 776; 733.

#### 6-Chloro-4-methylhexa-2,3-dienitrile (3o)

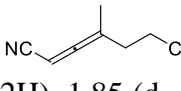 92% (26.1 mg) isolated yield, colorless oil, <sup>1</sup>H NMR (400 MHz, CDCl<sub>3</sub>) δ = 5.27 - 5.23 (m, 1H), 3.64 - 3.58 (m, 2H), 2.62 - 2.48 (m, 2H), 1.85 (d, *J* = 2.9 Hz, 3H). <sup>13</sup>C NMR (100 MHz, CDCl<sub>3</sub>) δ = 213.2, 113.7, 103.3, 67.7, 41.0, 35.7, 17.6. HRMS (EI) for C<sub>7</sub>H<sub>8</sub>ClKN [M+K]<sup>+</sup>: calcd 179.9977, found 179.9999. IR ν<sub>max</sub>/cm<sup>-1</sup> (in CHCl<sub>3</sub>): 3014; 2992; 2963; 2922; 2898; 2224; 1966; 1762; 1656; 1444; 1395; 1329; 1296; 1253; 912; 773; 732; 659.

#### 6-((*tert*-Butyldimethylsilyl)oxy)-4-methylhexa-2,3-dienitrile (3p)

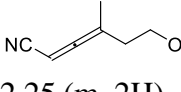 65% (30.9 mg) isolated yield, colorless oil, <sup>1</sup>H NMR (400 MHz, CDCl<sub>3</sub>) δ = 5.13 - 5.11 (m, 1H), 3.72 (t, *J* = 6.4 Hz, 2H), 2.33 - 2.25 (m, 2H), 1.83 (d, *J* = 3.0 Hz, 3H), 0.89 (s, 9H), 0.06 (s, 6H). <sup>13</sup>C NMR (100 MHz, CDCl<sub>3</sub>) δ = 213.6, 114.2, 103.8, 66.0, 60.5, 36.2, 25.8, 18.2, 17.9, -5.4. HRMS (EI) for C<sub>13</sub>H<sub>23</sub>NNaOSi [M+Na]<sup>+</sup>: calcd 260.1441, found 150.1431. IR ν<sub>max</sub>/cm<sup>-1</sup> (in CHCl<sub>3</sub>): 2991; 2929; 2224; 1965; 1445; 1375; 1192; 1120; 1080; 957; 913; 800; 770; 712.

### 6,6-Dimethoxy-4-methylhexa-2,3-dienenitrile (3q)

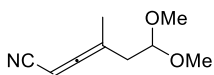 69% (23.1 mg) isolated yield, colorless oil,  $^1\text{H NMR}$  (400 MHz,  $\text{CDCl}_3$ )  $\delta = 5.18 - 5.16$  (m, 1H), 4.49 (t,  $J = 5.7$  Hz, 1H), 3.35 (d,  $J = 3.0$  Hz, 6H), 2.39 – 2.37 (m, 2H), 1.84 (d,  $J = 3.0$  Hz, 3H).  $^{13}\text{C NMR}$  (100 MHz,  $\text{CDCl}_3$ )  $\delta = 214.0, 114.0, 102.3, 66.3, 53.2, 53.1, 36.3, 18.2$ . HRMS (EI) for  $\text{C}_9\text{H}_{14}\text{NO}_2$   $[\text{M}+\text{H}]^+$ : calcd 168.1019, found 168.1015. IR  $\nu_{\text{max}}/\text{cm}^{-1}$ : 2991; 2933; 2224; 1965; 1445; 1364; 1192; 1120; 1065; 966; 913; 770; 728.

### 3-Cyclohexylideneacrylonitrile (3r)

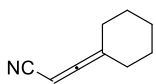 71% (18.9 mg) isolated yield, colorless oil,  $^1\text{H NMR}$  (400 MHz,  $\text{CDCl}_3$ )  $\delta = 5.07 - 5.05$  (m, 1H), 2.27 – 2.16 (m, 4H), 1.73 – 1.62 (m, 4H), 1.58 – 1.52 (m, 2H).  $^{13}\text{C NMR}$  (100 MHz,  $\text{CDCl}_3$ )  $\delta = 210.5, 114.7, 108.3, 64.6, 29.8, 26.4, 25.4$ . HRMS (EI) for  $\text{C}_9\text{H}_{11}\text{KN}$   $[\text{M}+\text{K}]^+$ : calcd 172.0523, found 172.0520. IR  $\nu_{\text{max}}/\text{cm}^{-1}$  (in  $\text{CHCl}_3$ ): 2934; 2855; 2363; 2223; 1960; 1655; 1621; 1448; 975; 913; 799; 734.

### 3-(3,4-Dihydronaphthalen-2(1H)-ylidene)acrylonitrile (3s)

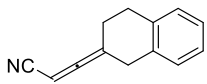 69% (25.7 mg) isolated yield, colorless oil,  $^1\text{H NMR}$  (400 MHz,  $\text{CDCl}_3$ )  $\delta = 7.20 - 7.11$  (m, 4H), 5.22 – 5.19 (m, 1H), 3.68 – 3.55 (m, 2H), 2.99 – 2.86 (m, 2H), 2.65 – 2.62 (m, 2H).  $^{13}\text{C NMR}$  (100 MHz,  $\text{CDCl}_3$ )  $\delta = 211.0, 135.9, 133.2, 128.5, 128.2, 126.5, 126.4, 114.1, 105.0, 66.4, 31.5, 29.1, 26.7$ . HRMS (APCI) for  $\text{C}_{13}\text{H}_{11}\text{N}$   $[\text{M}]^+$ : calcd 181.0886, found 181.0877. IR  $\nu_{\text{max}}/\text{cm}^{-1}$  (in  $\text{CHCl}_3$ ): 3023; 2925; 2847; 2212; 1966; 1730; 1652; 1495; 1453; 1353; 1258; 1154; 1106; 1036; 953; 916; 759; 743.

### 3-Cycloheptylideneacrylonitrile (3t)

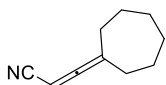 68% (20.0 mg) isolated yield, colorless oil,  $^1\text{H NMR}$  (400 MHz,  $\text{CDCl}_3$ )  $\delta = 5.06 - 5.04$  (m, 1H), 2.42 – 2.30 (m, 4H), 1.73 – 1.61 (m, 5H), 1.58 – 1.53 (m, 3H).  $^{13}\text{C NMR}$  (100 MHz,  $\text{CDCl}_3$ )  $\delta = 213.4, 114.6, 110.8, 64.5, 31.0, 29.2, 27.7$ . HRMS (EI) for  $\text{C}_{10}\text{H}_{13}\text{KN}$   $[\text{M}+\text{K}]^+$ : calcd 186.0680, found 186.0682. IR  $\nu_{\text{max}}/\text{cm}^{-1}$  (in  $\text{CHCl}_3$ ): 2925; 2853; 2209; 1952; 1635; 1459; 1353; 1283; 1022; 958; 911; 796; 734.

### 3-(2-Methyldihydrofuran-3(2H)-ylidene)acrylonitrile (3u)

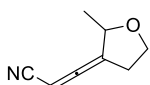 85% (23.0 mg) isolated yield, d.r. = 3:1, colorless oil,  $^1\text{H NMR}$  (400 MHz,  $\text{CDCl}_3$ )  $\delta = 5.38 - 5.31$  (m, 1H, major+minor), 4.63 – 4.59 (m, 1H, major+minor), 4.14 – 4.08 (m, 1H, major+minor), 3.84 – 3.77 (m, 1H, major+minor), 2.96 – 2.79 (m, 2H, major+minor), 1.40 (d,  $J = 8.0$  Hz, 3H, minor) 1.36 (d,  $J = 4.0$  Hz, 3H, major).  $^{13}\text{C NMR}$  (100 MHz,  $\text{CDCl}_3$ )  $\delta = 206.6, 113.6, 112.0, 77.2, 76.4, 76.2, 70.2, 70.2, 67.7, 32.0, 31.9, 19.3, 19.1$ . HRMS (EI) for  $\text{C}_8\text{H}_{10}\text{NO}$   $[\text{M}+\text{H}]^+$ : calcd 136.0757, found 136.0754. IR  $\nu_{\text{max}}/\text{cm}^{-1}$  (in  $\text{CHCl}_3$ ): 2980; 2932; 2868; 2224; 1970; 1435; 1378; 1350; 1293; 1229; 1106; 1086; 993; 863.

### 3-(Tetrahydro-4H-pyran-4-ylidene)acrylonitrile (3v)

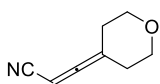 74% (20.0 mg) isolated yield, colorless oil,  $^1\text{H NMR}$  (400 MHz,  $\text{CDCl}_3$ )  $\delta = 5.20 - 5.19$  (m, 1H), 3.82 – 3.75 (m, 4H), 2.40 – 2.29 (m, 4H).  $^{13}\text{C NMR}$  (100 MHz,  $\text{CDCl}_3$ )  $\delta = 210.4, 114.0, 104.2, 67.5, 66.3, 29.6$ . HRMS (EI) for  $\text{C}_8\text{H}_{10}\text{NO}$   $[\text{M}+\text{H}]^+$ : calcd 136.0757, found 136.0754. IR  $\nu_{\text{max}}/\text{cm}^{-1}$  (in  $\text{CHCl}_3$ ): 3011; 2961; 2223; 1964; 1466; 1435; 1376; 1324; 1237; 1167; 1098; 1020; 990; 908; 842; 773; 727; 652; 552.

### 3-(1,4-Dioxaspiro[4.5]decan-8-ylidene)acrylonitrile (3w)

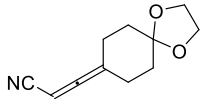 73% (27.9 mg) isolated yield, colorless oil,  $^1\text{H NMR}$  (400 MHz,  $\text{CDCl}_3$ )  $\delta = 5.14 - 5.11$  (m, 1H), 3.97 (s, 4H), 2.47 – 2.35 (m, 4H), 1.84 – 1.73 (m, 4H).  $^{13}\text{C NMR}$  (100 MHz,  $\text{CDCl}_3$ )  $\delta = 210.1, 114.3, 107.3, 106.1, 65.3, 64.5, 34.4, 27.1$ . HRMS (EI) for  $\text{C}_{11}\text{H}_{14}\text{NO}_2$   $[\text{M}+\text{H}]^+$ : calcd 192.1019, found 192.1010. IR  $\nu_{\text{max}}/\text{cm}^{-1}$  (in  $\text{CHCl}_3$ ): 3003; 2956; 2875; 2223; 1965; 1446; 1360; 1335; 1279; 1248; 1118; 1076; 1034; 953; 942; 903; 805; 778; 730, 674.

### 3-((1S,4S)-1,7,7-Trimethylbicyclo[2.2.1]heptan-2-ylidene)acrylonitrile (3x)

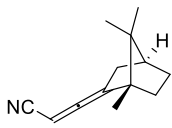 67% (25.1 mg) isolated yield, d.r = 1.6:1, colorless oil,  $^1\text{H NMR}$  (400 MHz,  $\text{CDCl}_3$ )  $\delta = 5.23$  (t,  $J = 4.0$  Hz, 1H, major), 5.16 (t,  $J = 4.0$  Hz, 1H, minor), 2.78 – 2.59 (m, 1H, major+minor), 2.21 – 2.09 (m, 1H, major+minor), 1.90 – 1.66 (m, 3H, major+minor), 1.59 – 1.21 (m, 2H, major+minor), 1.00 – 0.82 (m, 9H, major+minor).  $^{13}\text{C NMR}$  (100 MHz,  $\text{CDCl}_3$ )  $\delta = 208.7, 117.6, 117.2, 115.1, 114.9, 68.6, 68.3, 53.8, 53.7, 48.9, 48.8, 44.7, 34.8, 34.6, 34.5, 27.5, 27.4, 19.6, 18.5, 13.0$ . HRMS (EI) for  $\text{C}_{13}\text{H}_{17}\text{NNa}$   $[\text{M}+\text{Na}]^+$ : calcd 210.1253, found 210.1246. IR  $\nu_{\text{max}}/\text{cm}^{-1}$  (in  $\text{CHCl}_3$ ): 2956; 2875; 2363; 2220; 1958; 1656; 1613; 1471; 1450; 1390; 1376; 1307; 1280; 1145; 777; 734.

## 4.3 Determination of ee value of representative trisubstituted allenes

We checked the optical purity of some representative trisubstituted allenyl nitriles (3k-3m, 3o-3q) and found that the ee values of the products were all less than 5%.

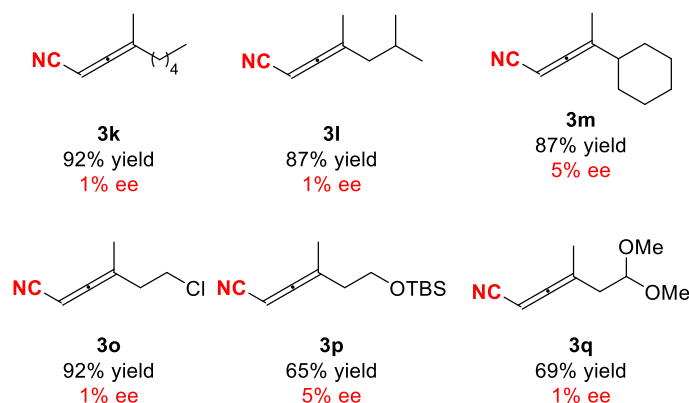

### Chiral HPLC spectrum of 3k

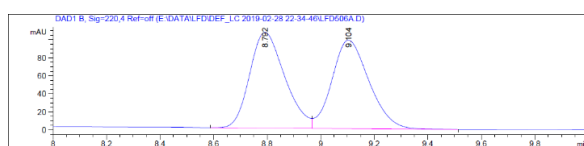

Determined by HPLC analysis (Chiralpak AS-H column, hexane/*i*-PrOH, 99:1 v/v, flow rate 0.5 mL/min,  $\lambda = 220$  nm, 25 °C)

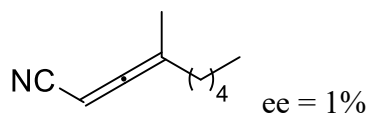

| Peak # | RetTime [min] | Type | Width [min] | Area mAU  | *s | Height [mAU] | Area %  |
|--------|---------------|------|-------------|-----------|----|--------------|---------|
| 1      | 8.792         | BV   | 0.1400      | 964.62238 |    | 106.18817    | 50.5315 |
| 2      | 9.104         | VB   | 0.1461      | 944.33014 |    | 98.24298     | 49.4685 |

### Chiral HPLC spectrum of 3l

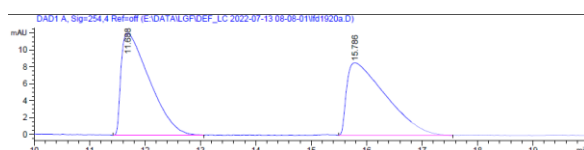

Determined by HPLC analysis (Chiralpak AS-H column, hexane/*i*-PrOH, 99:1 v/v, flow rate 0.5 mL/min,  $\lambda = 254$  nm, 25 °C)

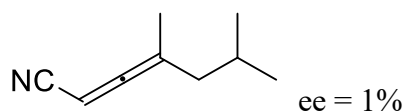

| Peak # | RetTime [min] | Type | Width [min] | Area mAU  | *s | Height [mAU] | Area %  |
|--------|---------------|------|-------------|-----------|----|--------------|---------|
| 1      | 11.688        | BB   | 0.4961      | 429.55692 |    | 12.10072     | 50.5739 |
| 2      | 15.786        | BB   | 0.6487      | 419.80847 |    | 8.58226      | 49.4261 |

### Chiral HPLC spectrum of 3m

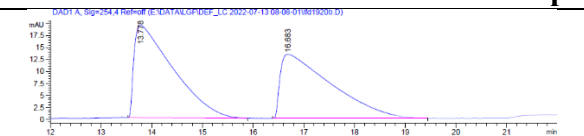

Determined by HPLC analysis (Chiralpak AS-H column, hexane/*i*-PrOH, 99:1 v/v, flow rate 0.5 mL/min,  $\lambda = 254$  nm, 25 °C)

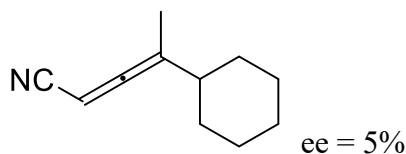

| Peak # | RetTime [min] | Type | Width [min] | Area mAU   | *s | Height [mAU] | Area %  |
|--------|---------------|------|-------------|------------|----|--------------|---------|
| 1      | 13.778        | BB   | 0.7054      | 1031.38733 |    | 19.30197     | 52.4616 |
| 2      | 16.683        | BB   | 0.8964      | 934.59851  |    | 13.35639     | 47.5384 |

### Chiral HPLC spectrum of 3o

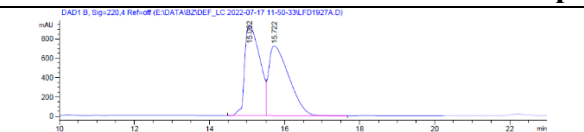

Determined by HPLC analysis (Chiralpak AS-H column, hexane/*i*-PrOH, 95:5 v/v, flow rate 1.0 mL/min,  $\lambda = 220$  nm, 25 °C)

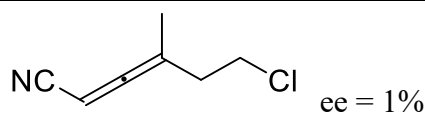

| Peak # | RetTime [min] | Type | Width [min] | Area mAU  | *s | Height [mAU] | Area %  |
|--------|---------------|------|-------------|-----------|----|--------------|---------|
| 1      | 15.062        | BV   | 0.4509      | 2.62269e4 |    | 936.04742    | 49.2884 |
| 2      | 15.722        | VB   | 0.5813      | 2.69842e4 |    | 723.16901    | 50.7116 |

### Chiral HPLC spectrum of 3p

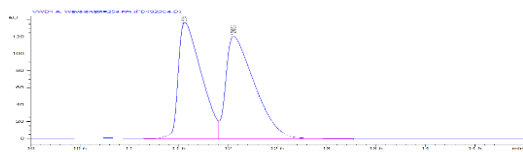

Determined by HPLC analysis (Chiralpak OD-H column, hexane/*i*-PrOH, 98:2 v/v, flow rate 1.0 mL/min,  $\lambda = 254$  nm, 25 °C)

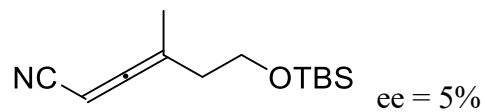

| Peak # | RetTime [min] | Type | Width [min] | Area mAU *s | Height [mAU] | Area %  |
|--------|---------------|------|-------------|-------------|--------------|---------|
| 1      | 11.564        | VV   | 0.2496      | 2228.09619  | 137.92882    | 47.4785 |
| 2      | 12.059        | VV   | 0.3075      | 2464.75317  | 121.03867    | 52.5215 |

### Chiral HPLC spectrum of 3q

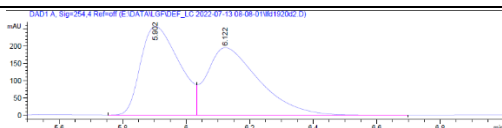

Determined by HPLC analysis (Chiralpak AS-H column, hexane/*i*-PrOH, 90:10 v/v, flow rate 0.5 mL/min,  $\lambda = 254$  nm, 25 °C)

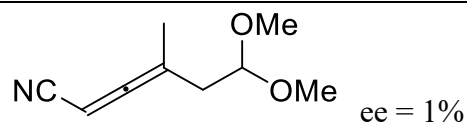

| Peak # | RetTime [min] | Type | Width [min] | Area mAU *s | Height [mAU] | Area %  |
|--------|---------------|------|-------------|-------------|--------------|---------|
| 1      | 5.902         | EV   | 0.1325      | 2168.95313  | 256.81137    | 49.4944 |
| 2      | 6.122         | VB   | 0.1682      | 2213.26685  | 195.25340    | 50.5056 |



## 5. Scaled-Up Reaction

This reaction was conducted according to the general procedure C: In an argon-filled glove box, a flame-dried 250 ml Schlenk flask equipped with a magnetic stirrer bar was charged sequentially with  $\text{Cu}(\text{CH}_3\text{CN})_4\text{BF}_4$  (78.64 mg, 0.25 mmol) and **L1** (106.9 mg, 0.30 mmol), followed by the addition of DMF (20 mL). Then the mixture was stirred at room temperature for 30 min. The vial was closed and the Schlenk flask was removed from the glove box, to the resulting mixture were added propargyl ester **1k** (10 mmol), DMF (80 mL) and organic photocatalyst **Ph-PTZ** (0.50 mmol). Then, the resulting mixture was degassed via 'freeze-pump-thaw' procedure (3 times) under argon atmosphere. After that, **TMSCN** (30 mmol) was added into the mixture. At last, the mixture was stirred at a distance of ~1 cm from 8 W purple LEDs at 30 °C about 24 h until the reaction was completed, as monitored by TLC analysis. In the separation process, the Ph-PTZ needed to be separated with petroleum ether and dichloromethane (200/1) first, and then the product was separated with petroleum ether and ethyl acetate (100/1). Finally, 3,5-di- $\text{CF}_3$ -benzoic acid was separated with petroleum ether, ethyl acetate and acetic acid (100/40/0.1).

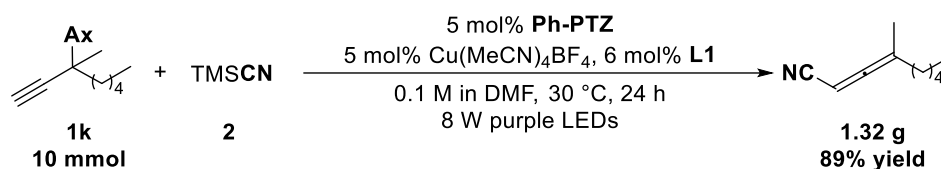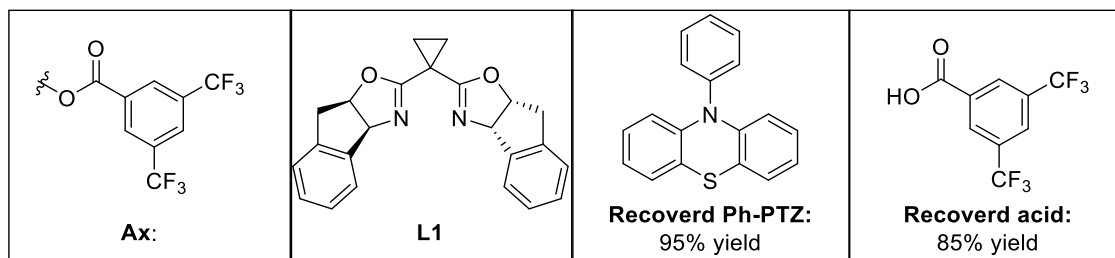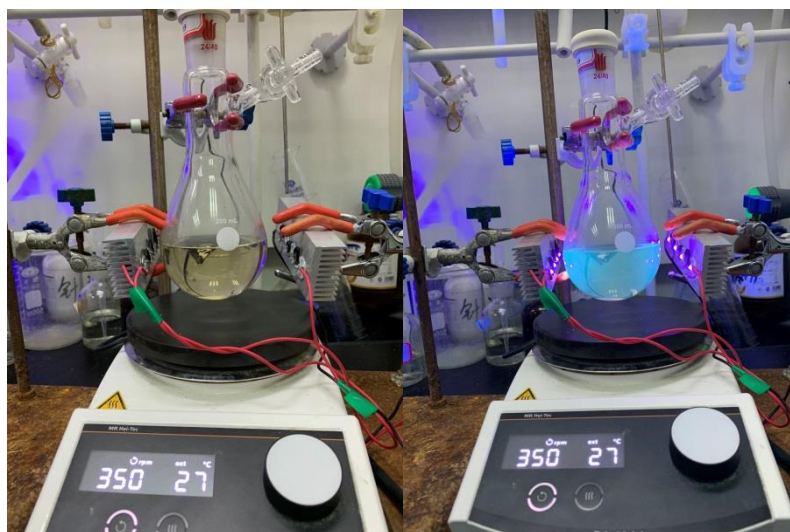

Figure S3. Scaled-up reaction

## 6. Synthetic Transformation

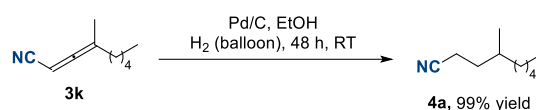

**Procedure for hydrogenation:** This reaction was conducted according to Sajiki's work. A flame-dried 50 mL Schlenk tube equipped with a magnetic stirrer bar was charged sequentially with 3k (29.9 mg, 0.2 mmol), MeOH (20 mL) and Pd/C (18mg, 20 wt %). The reaction mixture was stirred at room temperature for 48 h after pumped by H<sub>2</sub> balloon. Then the reaction was filtered by the diatomite and washed by ethyl acetate. The product was purified by flash column chromatography on silica gel (petrol ether/ EtOAc = 20/1) to afford the desired product in quantitative yield (32.3 mg) as colorless oil. <sup>1</sup>H NMR (400 MHz, CDCl<sub>3</sub>) δ = 2.41 – 2.29 (m, 2H), 1.74 – 1.67 (m, 1H), 1.51 – 1.42 (m, 1H), 1.34 – 1.22 (m, 8H), 1.18 – 1.09 (m, 1H), 0.91 – 0.87 (m, 6H). <sup>13</sup>C NMR (100 MHz, CDCl<sub>3</sub>) δ = 120.0, 36.1, 32.2, 32.0, 26.4, 22.6, 18.8, 14.9, 14.0. HRMS (EI) for C<sub>10</sub>H<sub>23</sub>N<sub>2</sub> [M+NH<sub>4</sub>]<sup>+</sup>: calcd 171.1856, found 171.1857. IR ν<sub>max</sub>/cm<sup>-1</sup>: 2957; 2927; 2872; 2227; 1742; 1464; 1428; 1380; 1280; 917; 791; 734.

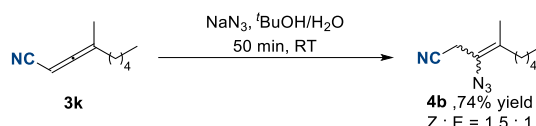

**Procedure for hydroazidation:** This reaction was conducted according to Liu's work. A 10 mL tube equipped with a magnetic stirrer bar was charged sequentially with NaN<sub>3</sub> (52 mg, 0.8 mmol), H<sub>2</sub>O (0.4 mL), and <sup>t</sup>BuOH solution (1.6 mL) of 3k (29.9 mg, 0.2 mmol). The reaction mixture was stirred at room temperature for 50 min. Then the reaction was quenched by NH<sub>4</sub>Cl solution and extracted by ethyl acetate. The organic layer was washed with brine, dried over Na<sub>2</sub>SO<sub>4</sub>. The product was purified by flash column chromatography on silica gel (petrol ether/ EtOAc = 100/1) to afford the desired product in 74% yield (32.3 mg, Z/E=1.5:1) as colorless oil.

Z-4b: <sup>1</sup>H NMR (400 MHz, CDCl<sub>3</sub>) δ = 3.36 (s, 2H), 2.06 – 2.02 (m, 2H), 1.74 (s, 3H), 1.47 – 1.24 (m, 6H), 0.90 (t, J = 7.0 Hz, 3H). <sup>13</sup>C NMR (100 MHz, CDCl<sub>3</sub>) δ = 130.0, 118.5, 115.8, 34.0, 31.5, 27.5, 22.5, 17.4, 17.2, 13.9. HRMS (EI) for C<sub>10</sub>H<sub>20</sub>N<sub>5</sub> [M+NH<sub>4</sub>]<sup>+</sup>: calcd 210.1713, found 210.1706. IR ν<sub>max</sub>/cm<sup>-1</sup>: 2957; 2931; 2871; 2860; 2103; 1753; 1660; 1467; 1459; 1418; 1378; 1262; 735.

E-4b: <sup>1</sup>H NMR (400 MHz, CDCl<sub>3</sub>) δ = 3.36 (s, 2H), 2.14 – 2.10 (m, 2H), 1.75 (s, 3H), 1.41 – 1.23 (m, 6H), 0.91 – 0.87 (m, 3H). <sup>13</sup>C NMR (100 MHz, CDCl<sub>3</sub>) δ = 130.1, 118.0, 115.7, 32.9, 31.5, 27.1, 22.5, 17.9, 17.5, 14.0. HRMS (EI) for C<sub>10</sub>H<sub>20</sub>N<sub>5</sub> [M+NH<sub>4</sub>]<sup>+</sup>: calcd 210.1713, found 210.1706. IR ν<sub>max</sub>/cm<sup>-1</sup>: 2959; 2931; 2861; 2215; 2105; 1758; 1655; 1456; 1378; 1291; 1098; 911; 734.

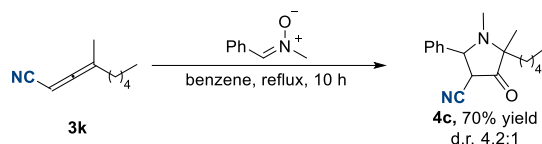

**Procedure for cyclization:** This reaction was conducted according to Sajiki's work. A flame-dried 10 ml Sealing tube equipped with a magnetic stirrer bar was charged sequentially with (Z)-N-methyl-1-phenylmethanimine oxide (0.2 mmol, 27.03 mg), 3k (29.9 mg, 0.2 mmol) and benzene (2.4 mL). The reaction mixture was stirred at 82 °C for 10 h. The product was purified by flash column chromatography on silica gel (petrol ether/ EtOAc = 100/1) to afford the desired product in 70% yield (32.3 mg, dr = 4.2:1) as colorless oil. <sup>1</sup>H NMR (400 MHz, CDCl<sub>3</sub>) δ = 7.48 – 7.37 (m, 6H, major+minor), 4.21 (d, J = 9.7 Hz, 1H, minor), 3.97 (d, J = 10.3 Hz, 1H, major), 3.24 (d, J = 9.7 Hz, 1H, minor), 3.19 (d, J = 10.3 Hz, 1H, major), 2.23 (s, 1H, major+minor), 2.13 (s, 3H, major+minor), 1.81 – 1.72 (m, 1H, major+minor), 1.68 – 1.54 (m, 3H, major+minor), 1.37 (d, J = 9.9 Hz, 2H, major+minor), 1.31 – 1.22 (m, 5H, major+minor), 1.13 (s, 3H, major+minor), 1.10 – 1.00 (m, 1H, major+minor), 0.90 (t, J = 7.0 Hz, 5H, major+minor). <sup>13</sup>C NMR (100 MHz, CDCl<sub>3</sub>) δ = 206.1, 205.3, 138.3, 137.9, 129.2, 129.2, 129.0, 128.9, 128.8, 128.7, 128.3, 127.2, 127.0, 114.6, 114.5, 77.2, 69.1, 69.0, 68.2, 67.4, 66.8, 64.5, 48.5, 47.1, 44.9, 36.4, 36.1, 32.4, 31.9, 31.8, 31.6, 31.4, 31.2, 31.0, 24.4, 24.0, 23.8, 22.6, 22.5, 22.4, 22.3, 15.7, 15.0, 14.0. HRMS (EI) for C<sub>18</sub>H<sub>24</sub>N<sub>2</sub>NaO [M+Na]<sup>+</sup>: calcd 307.1781, found 307.1799. IR ν<sub>max</sub>/cm<sup>-1</sup>: 2954; 2930; 2970; 2958; 2251; 2206; 1766; 1604; 1495; 1455; 1368; 1147; 759.

## 7. Preliminary Result of Asymmetric Version

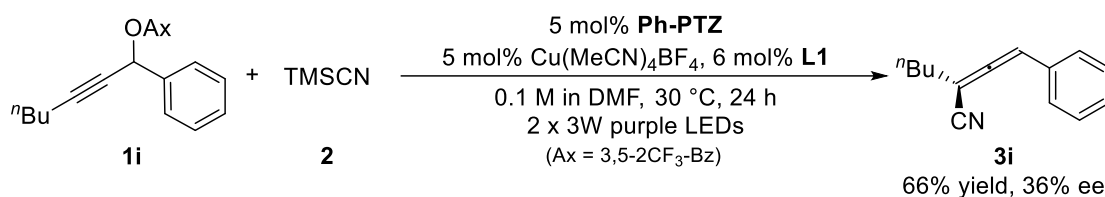

Chiral allenyl nitrile **3i** was obtained according to General Procedure D. Light yellow oil, 29.6 mg, 66% isolated yield, 36% ee,  $[\alpha]_D^{25} = -21.52$  ( $c = 0.51$  in  $\text{CHCl}_3$ ); the ee value was determined by HPLC analysis (Chiralpak OJ-H column, hexane/*i*-PrOH, 98:2 v/v, flow rate 1.0 mL/min,  $\lambda = 254$  nm, 25 °C),  $t_R$  (major) = 16.83 min,  $t_R$  (minor) = 15.40 min.

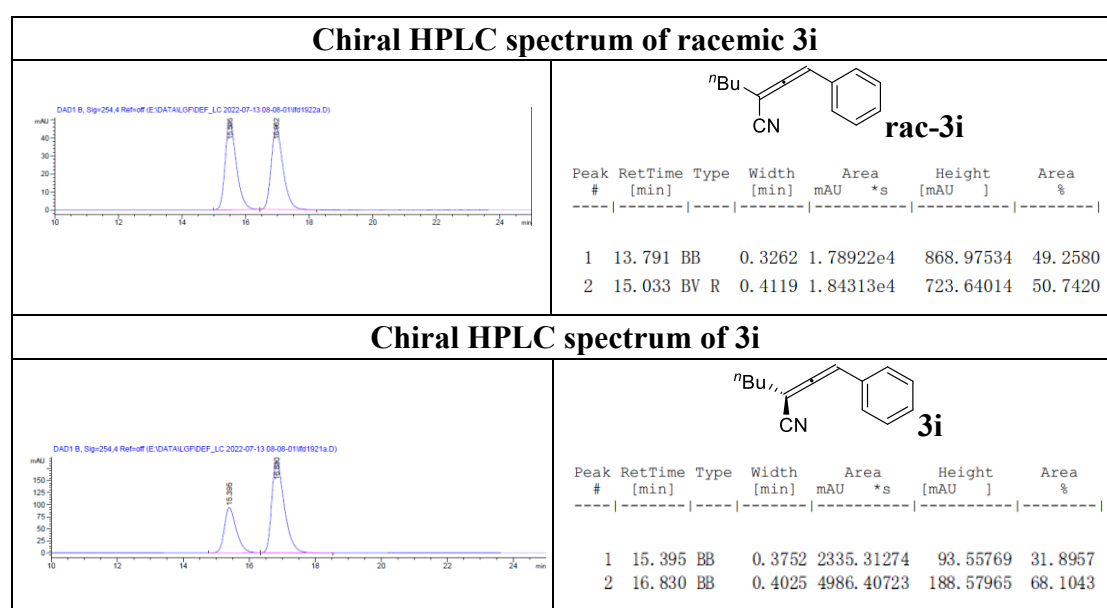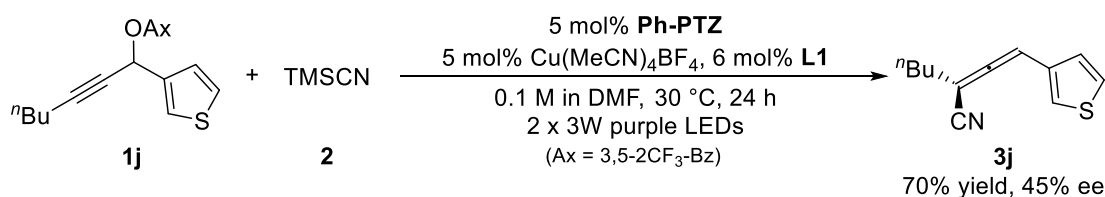

Chiral allenyl nitrile **3j** was obtained according to General Procedure D. Light yellow oil, 28.5 mg, 70% isolated yield, 45% ee,  $[\alpha]_D^{25} = -14.13$  ( $c = 0.60$  in  $\text{CHCl}_3$ ); the ee value was determined by HPLC analysis (Chiralpak OD-H column, hexane/*i*-PrOH, 98:2 v/v, flow rate 1.0 mL/min,  $\lambda = 254$  nm, 25 °C),  $t_R$  (major) = 6.93 min,  $t_R$  (minor) = 6.71 min.

### Chiral HPLC spectrum of racemic 3j

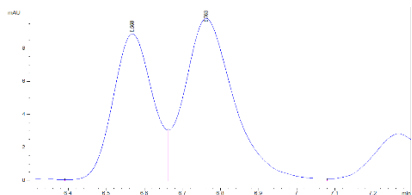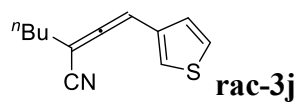

| Peak # | RetTime [min] | Type | Width [min] | Area mAU *s | Height [mAU] | Area %  |
|--------|---------------|------|-------------|-------------|--------------|---------|
| 1      | 6.568         | VV   | 0.1150      | 1392.45715  | 189.08821    | 48.5515 |
| 2      | 6.763         | VV   | 0.1202      | 1475.54480  | 189.08769    | 51.4485 |

### Chiral HPLC spectrum of 3j

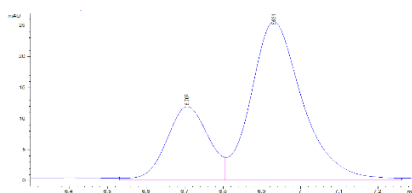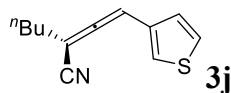

| Peak # | RetTime [min] | Type | Width [min] | Area mAU *s | Height [mAU] | Area %  |
|--------|---------------|------|-------------|-------------|--------------|---------|
| 1      | 6.707         | VV   | 0.1176      | 89.63736    | 11.81416     | 27.4112 |
| 2      | 6.931         | VV   | 0.1406      | 237.37280   | 25.49876     | 72.5888 |

## 8. Mechanistic Investigation

### 8.1 Cyclic Voltammetry Experiments

Cyclic Voltammetry was performed on a GU Instruments Electrochemical Workstation model GU/07078C. CV measurement of starting material was carried out in 0.1 M of Bu<sub>4</sub>NPF<sub>6</sub>/MeCN at a scan rate of 100 mV/s with the protection of Ar. The working electrode is a glassy carbon, the counter electrode is a Pt wire, and the reference electrode is Ag/AgCl.

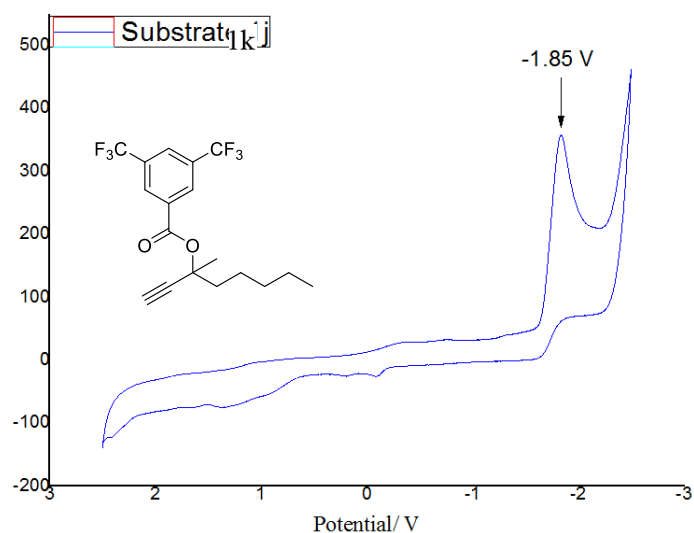

Figure S4. Cyclic voltammogram of **1k**

### 8.2 Luminescence Quenching Experiments

Fluorescence spectra were collected on Agilent Fluorescence Spectrophotometer G9800A for all experiments. Ph-PTZ solutions were excited at 355 nm and the emission intensity was collected at 447 nm. In a typical experiment, the emission spectrum of a  $1 \times 10^{-4}$  M solution of Ph-PTZ in DMF was collected. The significant decrease of Ph-PTZ luminescence could be observed in the presence of substrate **1k**.

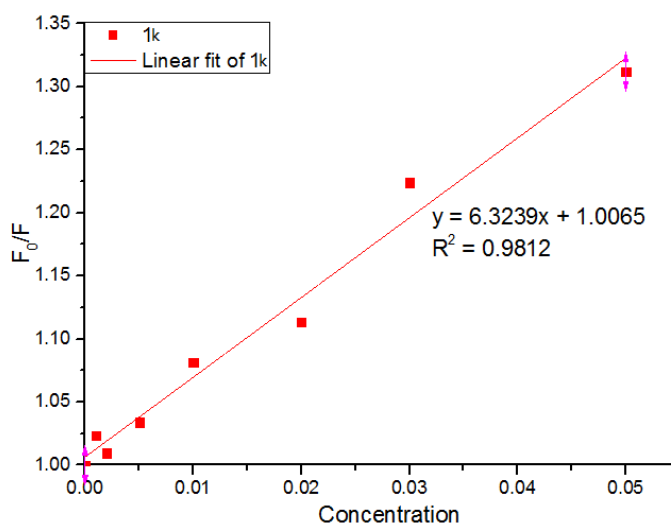

Figure S5. Ph-PTZ emission quenching by **1k**

### 8.3 Light On-Off Experiments

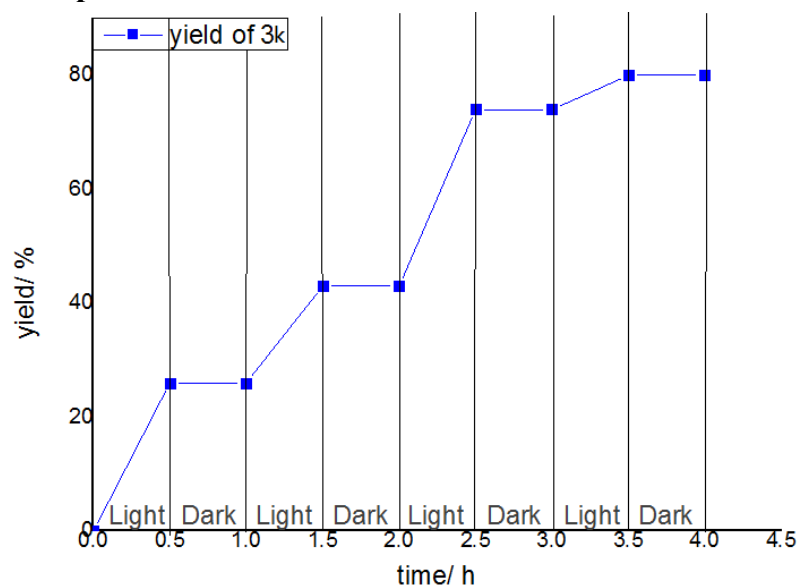

**Figure S6.** Light on-off experiments

The yield of **3k** was determined by  $^1\text{H}$  NMR using 1,3,5-trimethoxybenzene as an internal standard. The results revealed that a radical chain process was not the major reaction pathway, while it could not be completely ruled out at the current stage.

### 8.4 Determination of quantum yield

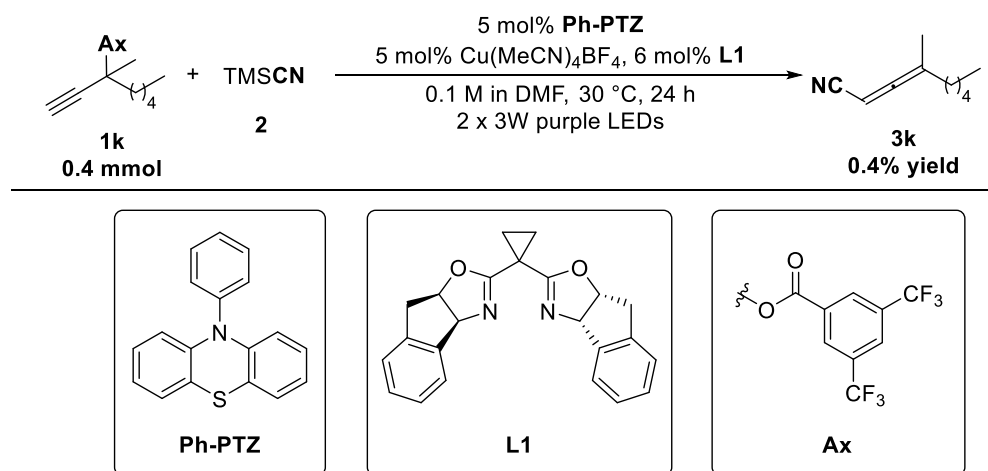

$\phi = \text{Mole number for product} / \text{Mole number for absorption of photons} = 0.776$

$$\phi = \frac{nN_A/t}{fP\lambda/hc}$$

n: the mole number of the product **3k**; t: reaction time (14400 s, 4 h);  $N_A$ :  $6.02 \times 10^{23}$  /mol; f:  $1 - 10^{-A}$  (400 nm,  $A = 0.7$ ); P:  $P = E \cdot S$  (E: illumination intensity,  $E = 0.3 \text{ mW/cm}^2$ );

S: the area that irradiated  $S = 0.15 \text{ cm}^2$ ;  $\lambda$ : wavelength ( $\lambda = 4.0 \times 10^{-7} \text{ m}$ );  $h$ : planck constant ( $h = 6.626 \times 10^{-34} \text{ J}\cdot\text{s}$ );  $c$ : velocity of light ( $c = 3 \times 10^8 \text{ m/s}$ ).

## 8.5 Radical Trapping Experiments

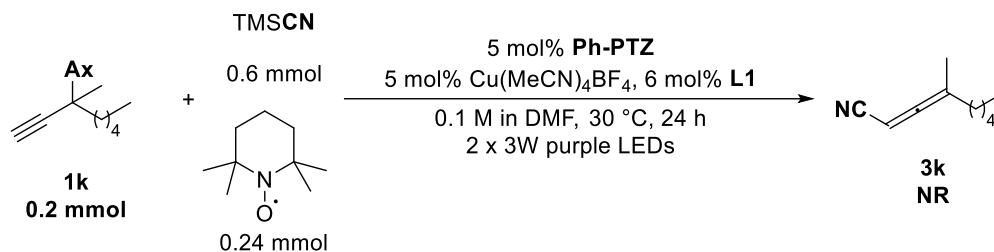

In an argon-filled glove box, a flame-dried 10 ml Schlenk tube equipped with a magnetic stirrer bar was charged sequentially with  $\text{Cu}(\text{CH}_3\text{CN})_4\text{BF}_4$  (3.15 mg, 0.01 mmol) and L1 (4.28 mg, 0.012 mmol), followed by the addition of DMF (0.5 mL). Then the mixture was stirred at room temperature for 30 min. The vial was closed and the Schlenk tube was removed from the glove box, to the resulting mixture were added propargyl ester **1k** (0.20 mmol), 2,2,6,6-Tetramethylpiperidinoxy (0.24 mmol), DMF (1.5 mL) and Ph-PTZ (0.01 mmol). Then, the resulting mixture was degassed via ‘freeze-pump-thaw’ procedure (3 times) under argon atmosphere. After that, TMSCN (0.6 mmol) was added into the mixture. At last, the mixture was stirred at a distance of  $\sim 1 \text{ cm}$  from a 2 x 3 W purple LEDs at 30 °C for 24 h.

## 8.6 Product racemization experiments

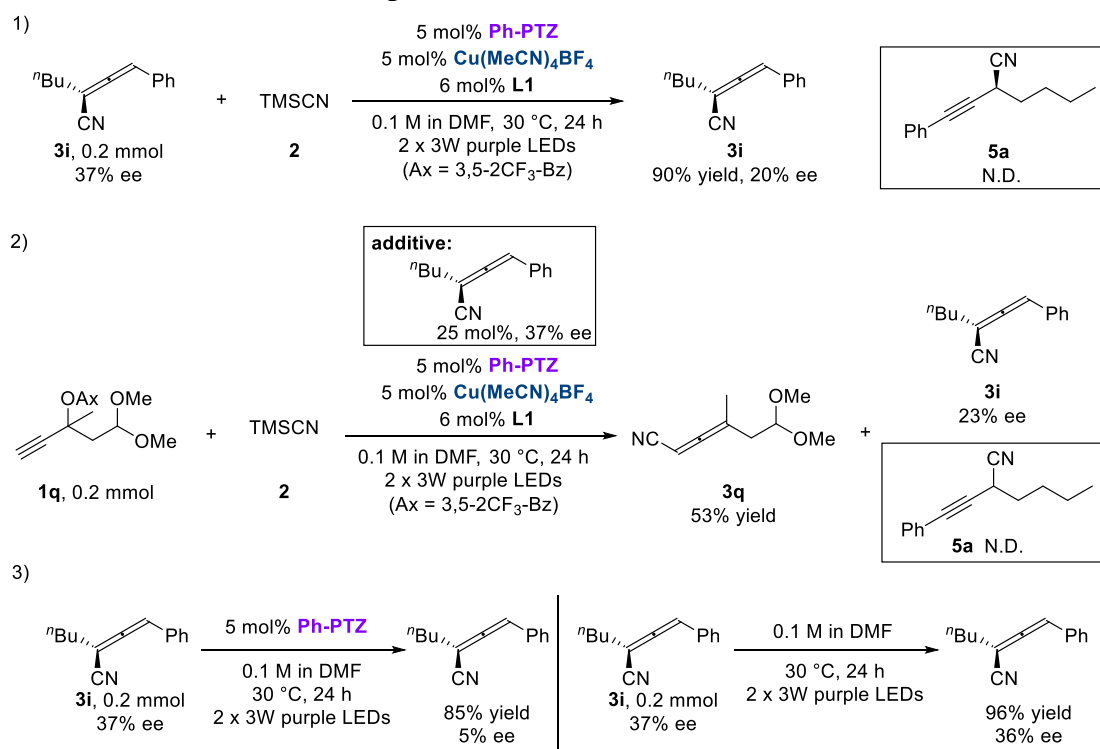



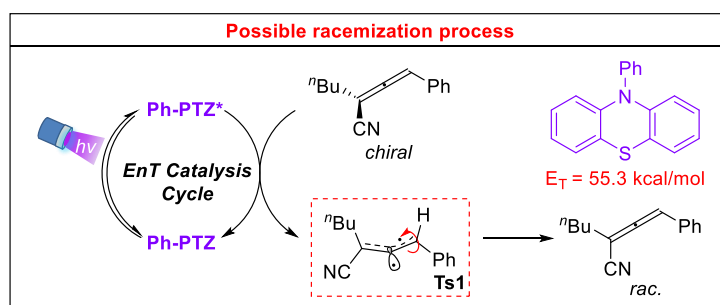

When chiral allenyl nitriles **3i** was subjected to the photocatalysis condition with Ph-PTZ as the photocatalyst and 2x3 W purple LEDs as the light source, we observed different degrees of racemization of **3i**. Thus, we believe that the allene racemization process does exist in the reaction system. Furthermore, through further experimental exploration, we found that the racemization of **3i** requires the participation of both photocatalyst and light. Therefore, we reasoned that the allenyl nitriles in the reaction system would undergo energy transfer with the excited-state photocatalyst to generate the di-radical intermediate **Ts1** leading to racemization.

### 8.7 Intermediate verification experiments

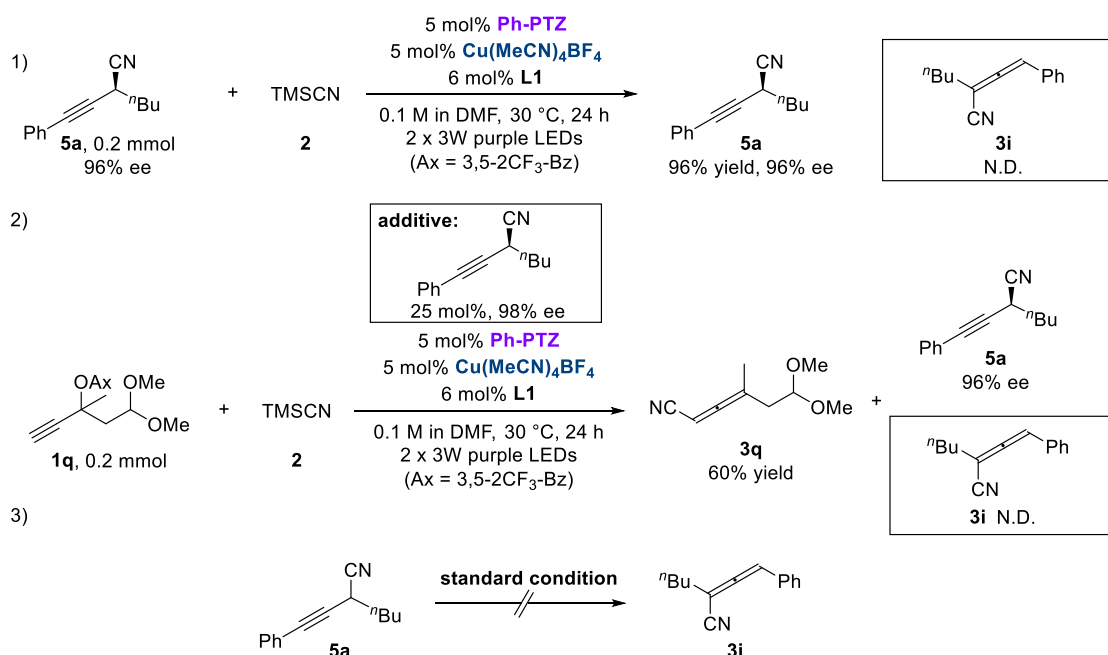

When chiral propargyl nitrile was used as a substrate or an additive under the standard reaction conditions, we observed that the propargyl nitrile would not be converted to allenyl nitrile and no racemization process was observed. Therefore, we reasoned that the propargyl nitrile intermediate was not the intermediate during the reaction, and the allenyl nitrile product is generated by the capture of the allenyl radical

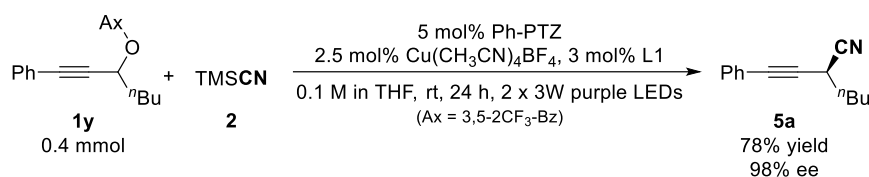

Chiral propargyl nitrile **5a** was prepared according to our previous work (*J. Am. Chem. Soc.*, **2019**, *141*, 6167-6172). In an argon-filled glove box, a flame-dried 10 ml Schlenk tube equipped with a magnetic stirrer bar was charged sequentially with  $\text{Cu}(\text{CH}_3\text{CN})_4\text{BF}_4$  (3.15 mg, 0.01 mmol) and L1 (4.28 mg, 0.012 mmol), followed by the addition of THF (1.0 mL). Then the mixture was stirred at room temperature for 30 min. The vial was closed and removed the Schlenk tube from the glove box, to the resulting mixture were added propargyl ester **1y** (171.3 mg, 0.40 mmol), THF (3.0 mL) and Ph-PTZ (5.5 mg, 0.02 mmol). Then, the resulting mixture was degassed via ‘freeze-pump-thaw’ procedure (3 times) under argon atmosphere. After that, TMSCN (118.9 mg, 1.2 mmol) was added into the mixture. At last, the mixture was stirred at a distance of ~1 cm from a 2 x 3 W purple LEDs at room temperature about 24 h until the reaction was completed, as monitored by TLC analysis. The product was purified by flash column chromatography on silica gel (petrol ether/ EtOAc = 100/1) to afford the desired product in 78% (61.5 mg) isolated yield. light yellow oil,  $[\alpha]_{\text{D}}^{25} = -1.6$  ( $c = 0.50$  in  $\text{CHCl}_3$ ); 96% ee, determined by HPLC analysis (Chiralpak AS-H column, hexane/*i*-PrOH, 99:2 v/v, flow rate 0.5 mL/min,  $\lambda = 200$  nm, 25 °C),  $t_{\text{R}}$  (major) = 30.70 min,  $t_{\text{R}}$  (minor) = 26.74 min.  $^1\text{H NMR}$  (400 MHz,  $\text{CDCl}_3$ )  $\delta = 7.46 - 7.40$  (m, 2H), 7.37 – 7.27 (m, 3H), 3.73 (t,  $J = 6.9$  Hz, 1H), 1.97 – 1.91 (m, 2H), 1.64 – 1.55 (m, 2H), 1.45 – 1.36 (m, 2H), 0.95 (t,  $J = 7.3$  Hz, 3H).  $^{13}\text{C NMR}$  (100 MHz,  $\text{CDCl}_3$ )  $\delta = 131.7, 128.8, 128.3, 121.7, 117.7, 83.8, 81.2, 33.0, 28.7, 23.7, 21.8, 13.7$ . HRMS (EI) for  $\text{C}_{14}\text{H}_{15}\text{N}$   $[\text{M}]^+$ : calcd 197.1199, found 197.1207. IR  $\nu_{\text{max}}/\text{cm}^{-1}$ : 2930, 2252, 1490, 1455, 1260, 1075, 1040, 803, 760, 690, 528.

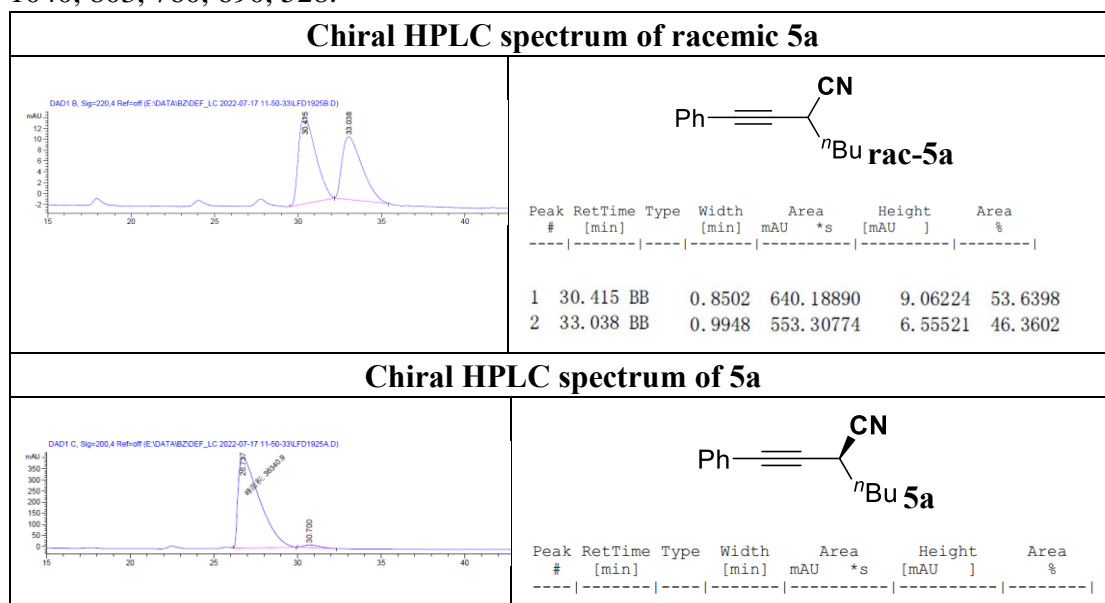

|  |   |        |    |        |           |           |         |
|--|---|--------|----|--------|-----------|-----------|---------|
|  | 1 | 26.737 | MM | 1.4814 | 3.63409e4 | 408.86542 | 97.9993 |
|  | 2 | 30.700 | BB | 0.7690 | 741.92841 | 11.43475  | 2.0007  |

## 8.8 Explanation for the chemoselectivity of reaction

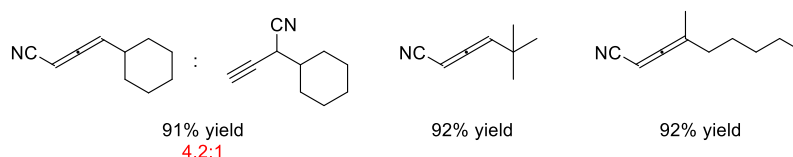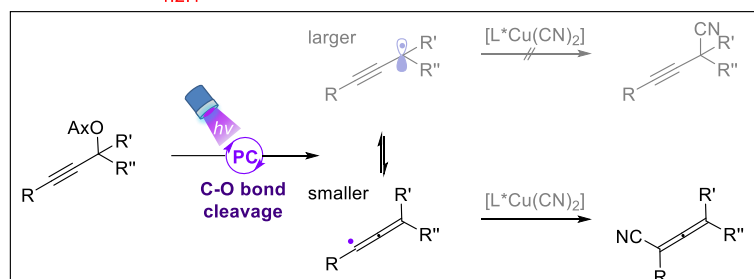

5.71  
5.70  
5.68  
5.24  
5.23  
5.22  
5.22

3.40  
3.39  
3.38  
3.38

2.33  
2.32

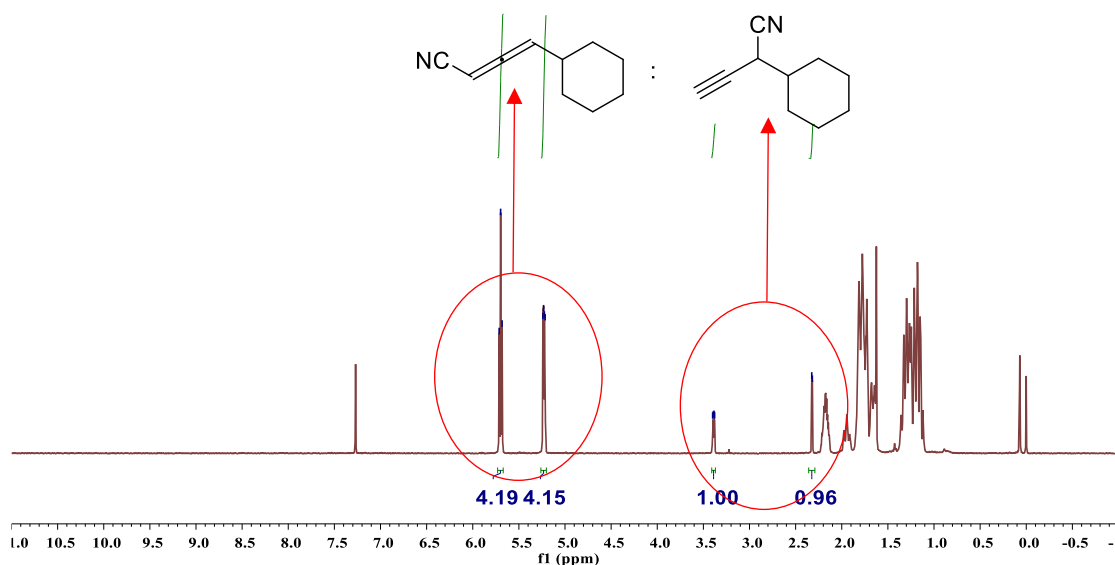

By analyzing the above results, we found that when the steric hindrance of the propargyl radical is relatively small, the propargyl radical can either directly participate in the reaction, or can be isomerized into an allenyl radical to participate in the reaction. When the steric hindrance increases, propargyl radicals tend to isomerize to allenyl radicals with less steric hindrance to participate in the reaction. Therefore, we reasoned that the chemoselectivity of the reaction might be attributed to the steric hindrance of the radical intermediates generated in the reaction.

## 9. Copies of NMR Spectra

### <sup>1</sup>H NMR spectrum of compound 1a

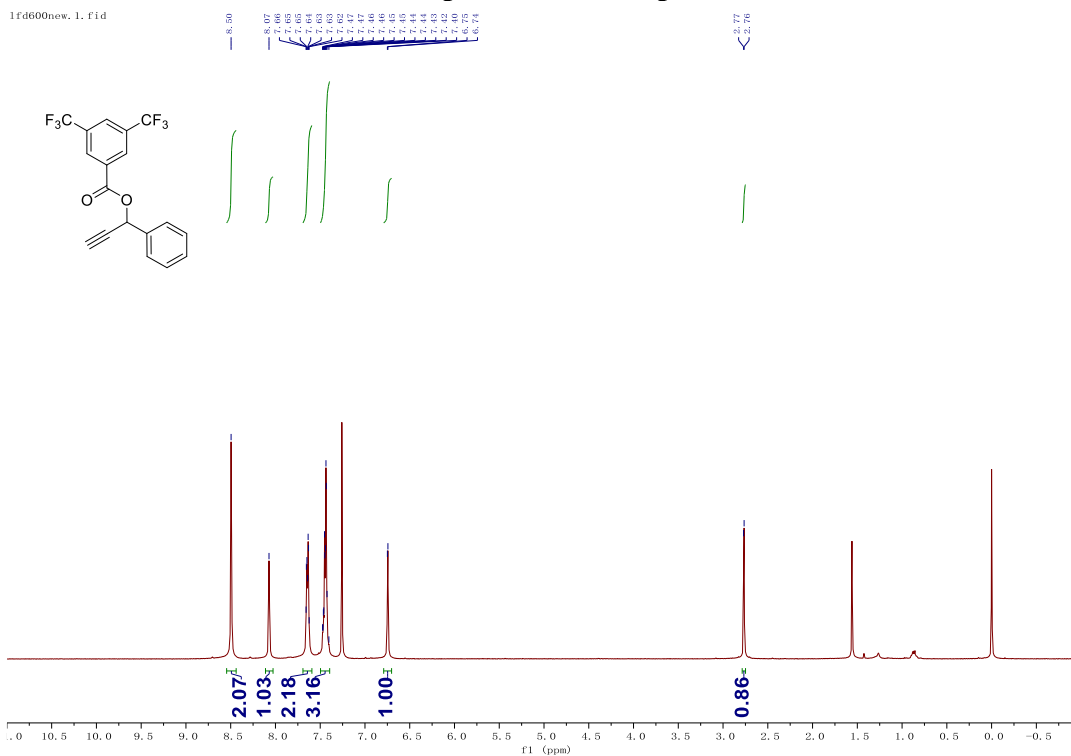

### <sup>13</sup>C NMR spectrum of compound 1a

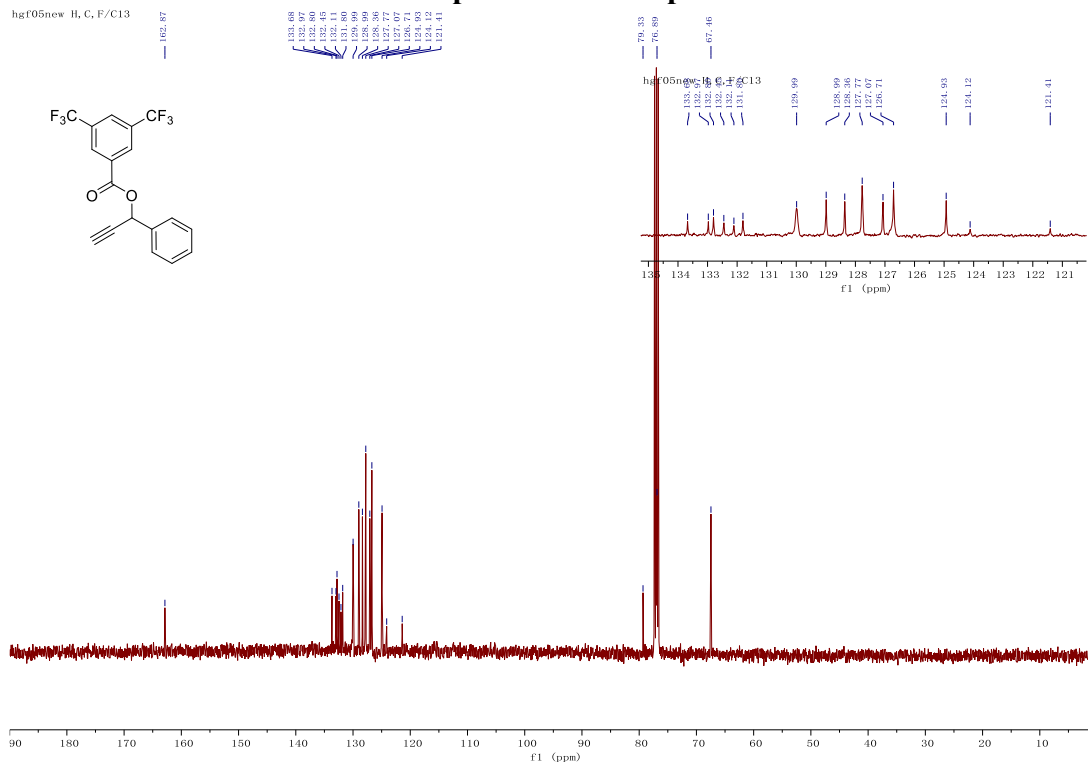

# <sup>19</sup>F NMR spectrum of compound 1a

1fd600new. 2. fid

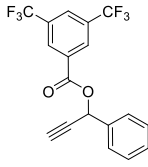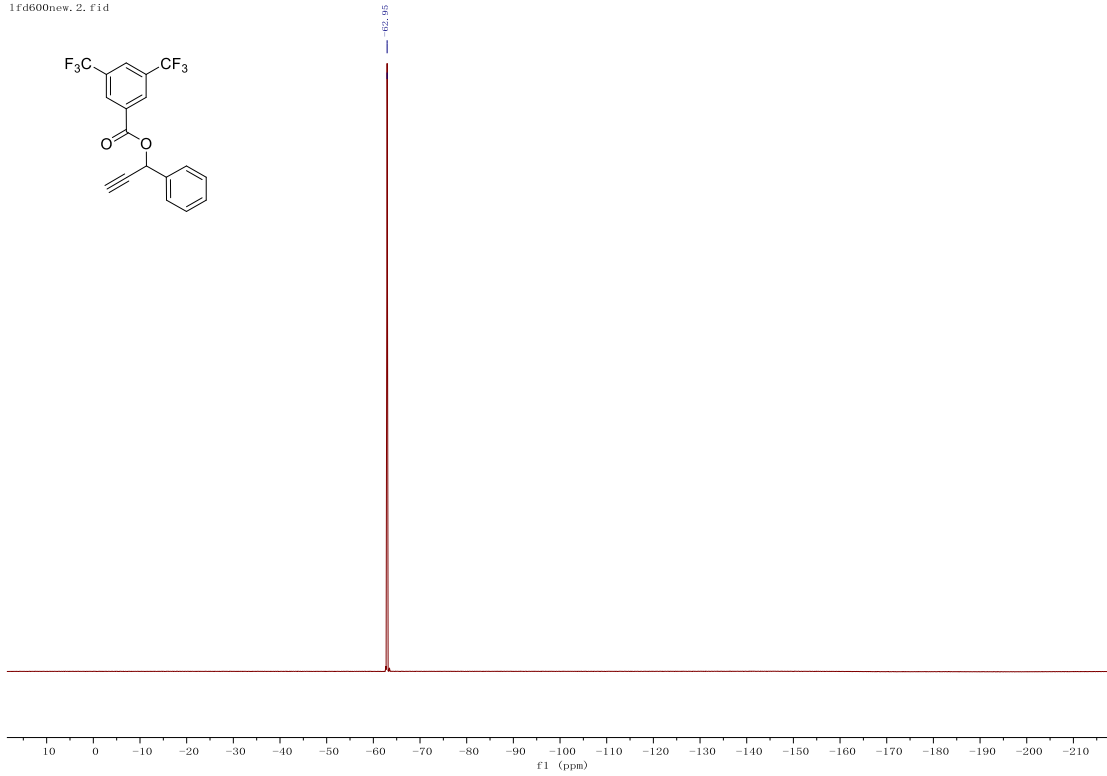

# <sup>1</sup>H NMR spectrum of compound 1b

hgf30b/1

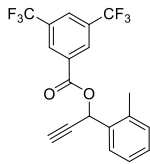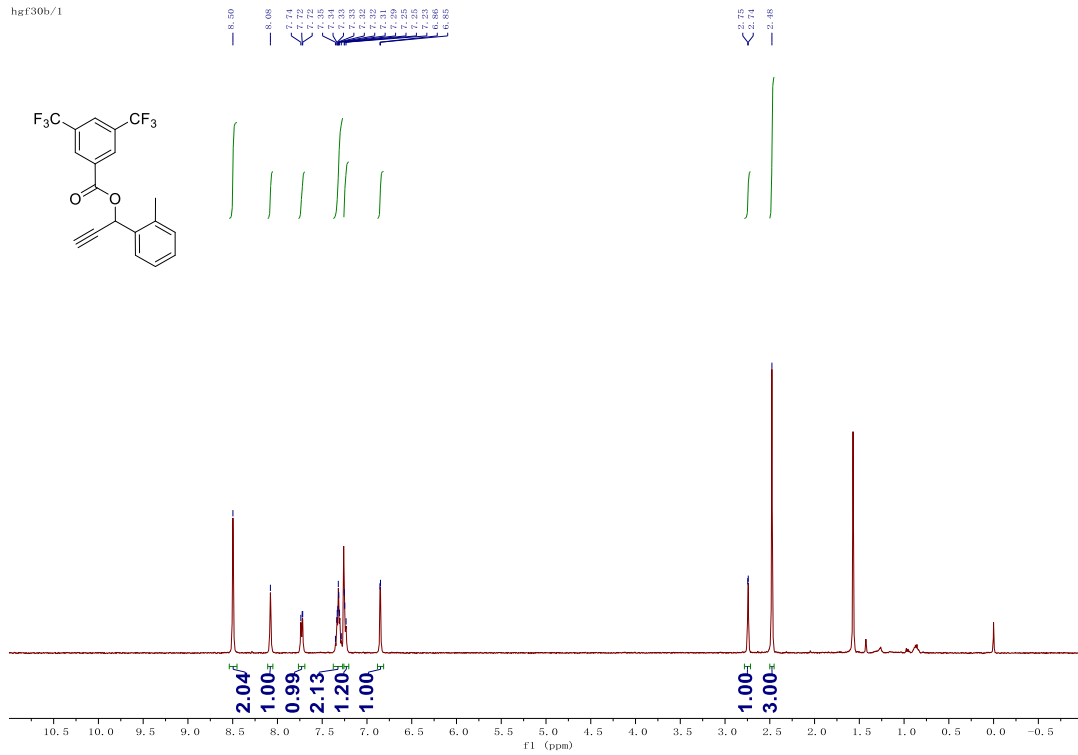

### <sup>13</sup>C NMR spectrum of compound 1b

hgf30b H, C/C13

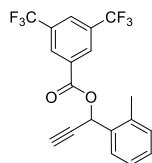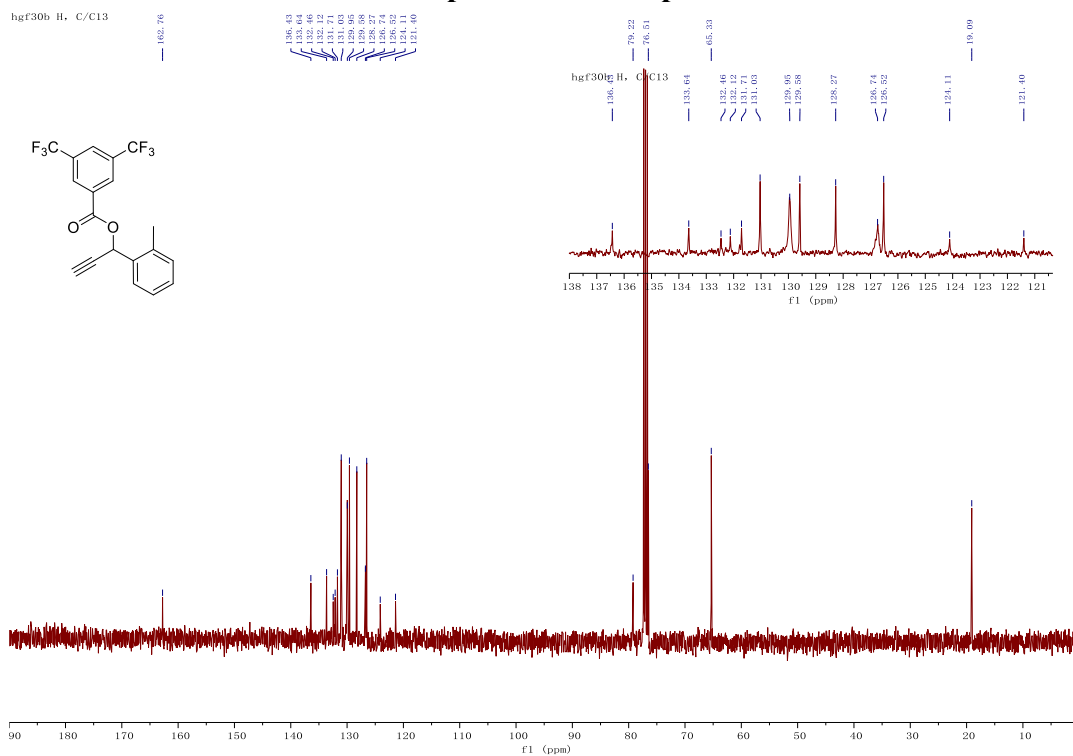

### <sup>19</sup>F NMR spectrum of compound 1b

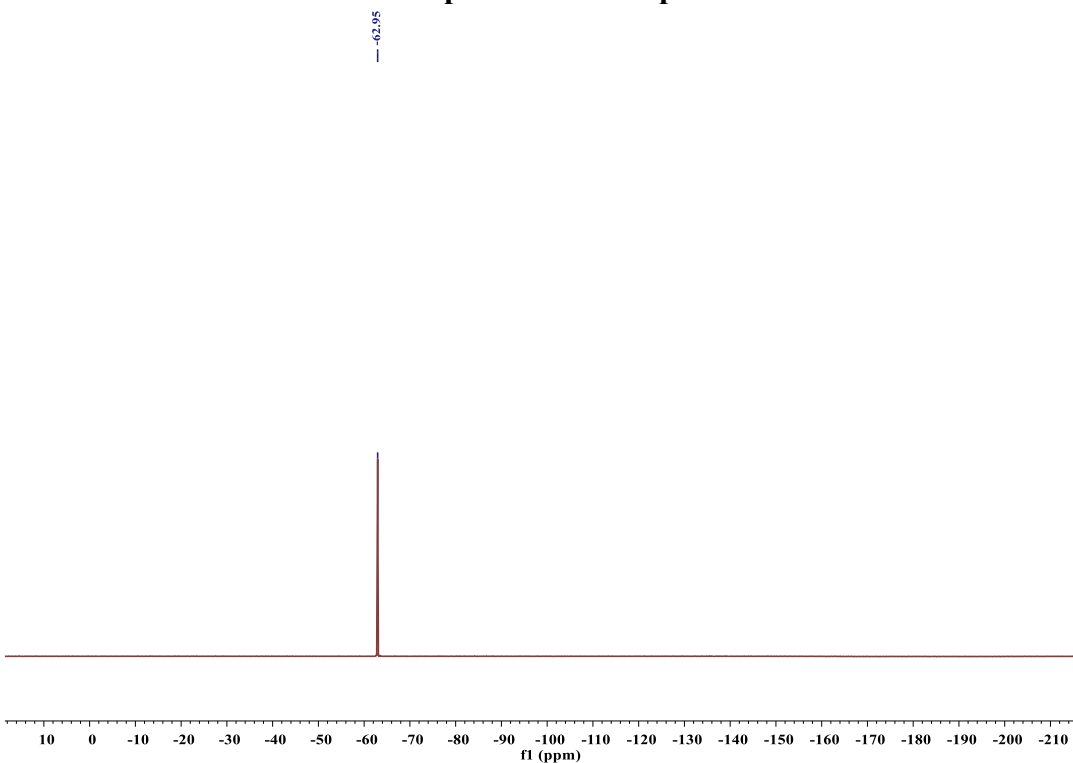

# <sup>1</sup>H NMR spectrum of compound 1c

hgfsdnew.1.fid

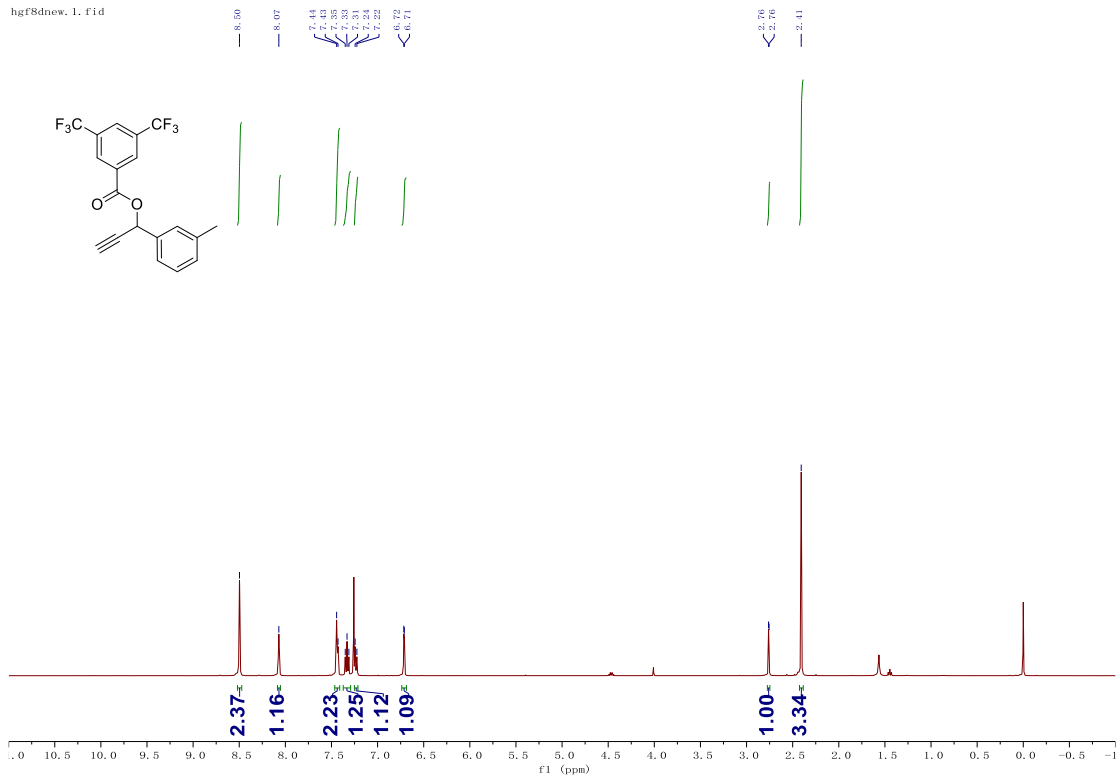

# <sup>13</sup>C NMR spectrum of compound 1c

hgfsdnew H, C, F/C13

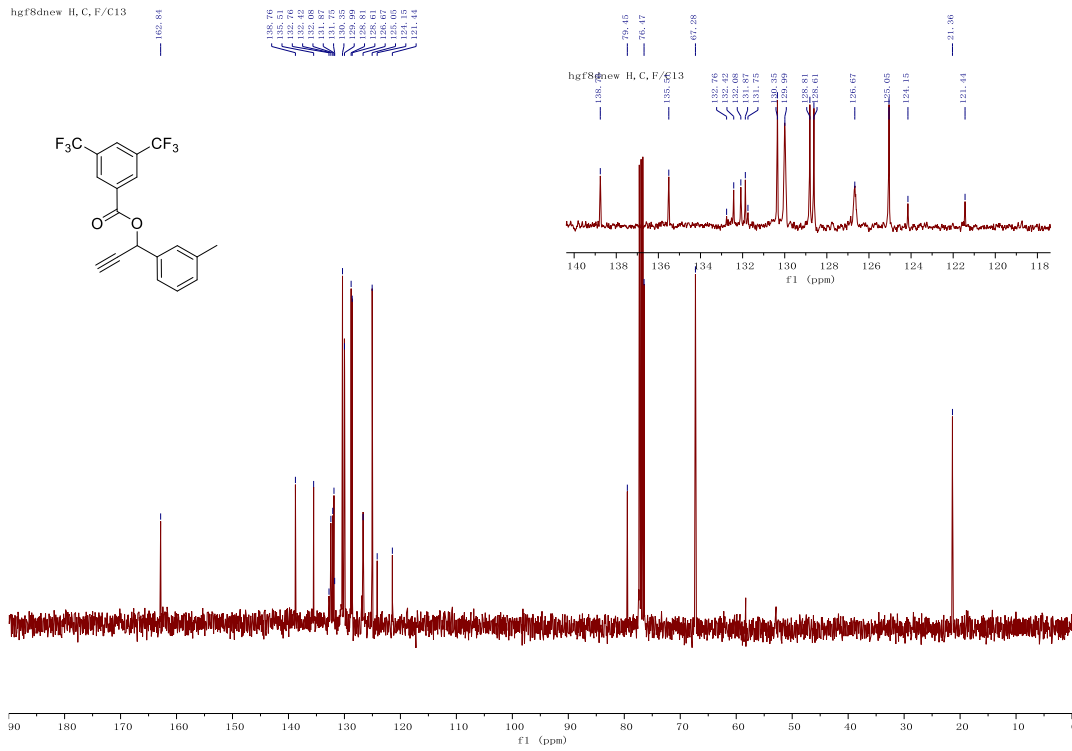

### <sup>19</sup>F NMR spectrum of compound 1c

hgf8dnew.2.fid

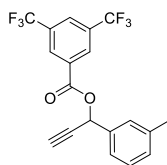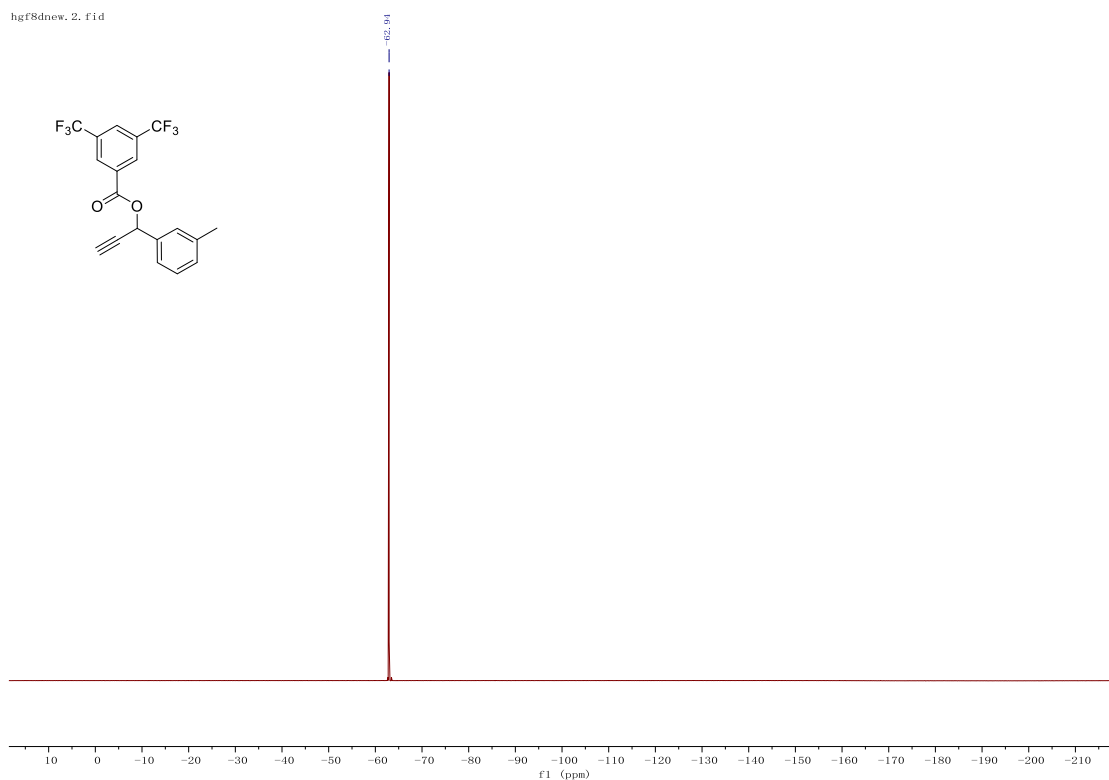

### <sup>1</sup>H NMR spectrum of compound 1d

hgf74a-new.1.fid

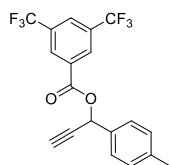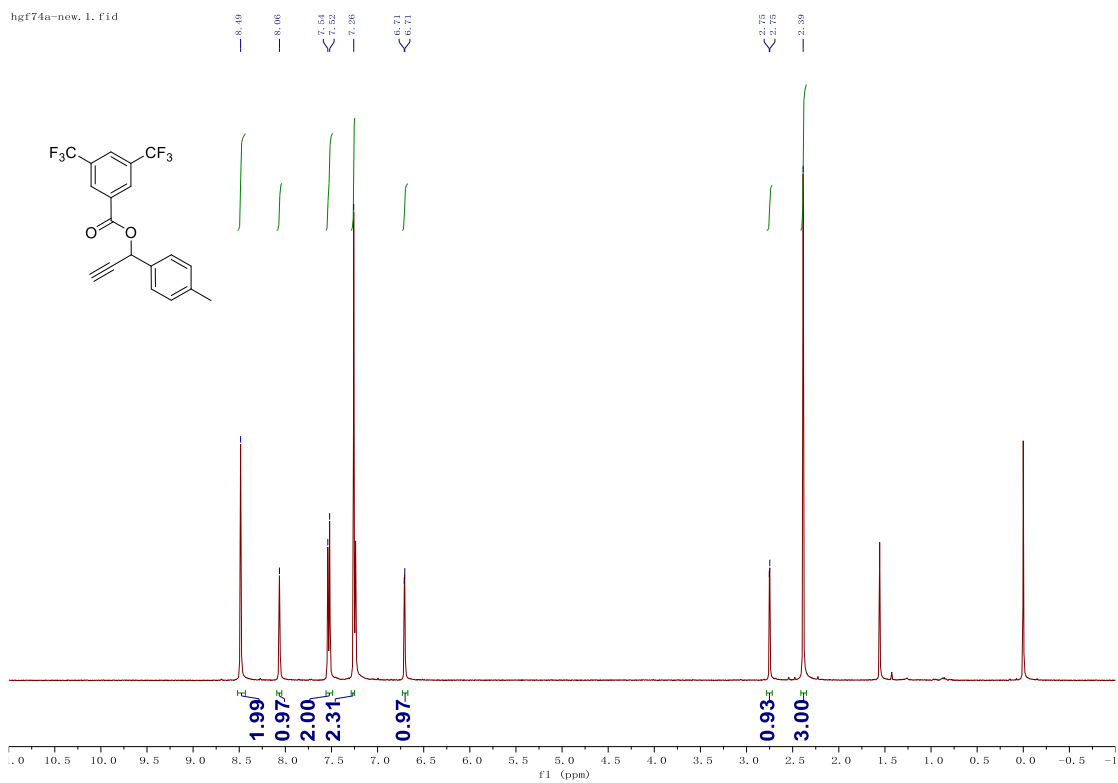



### <sup>13</sup>C NMR spectrum of compound 1d

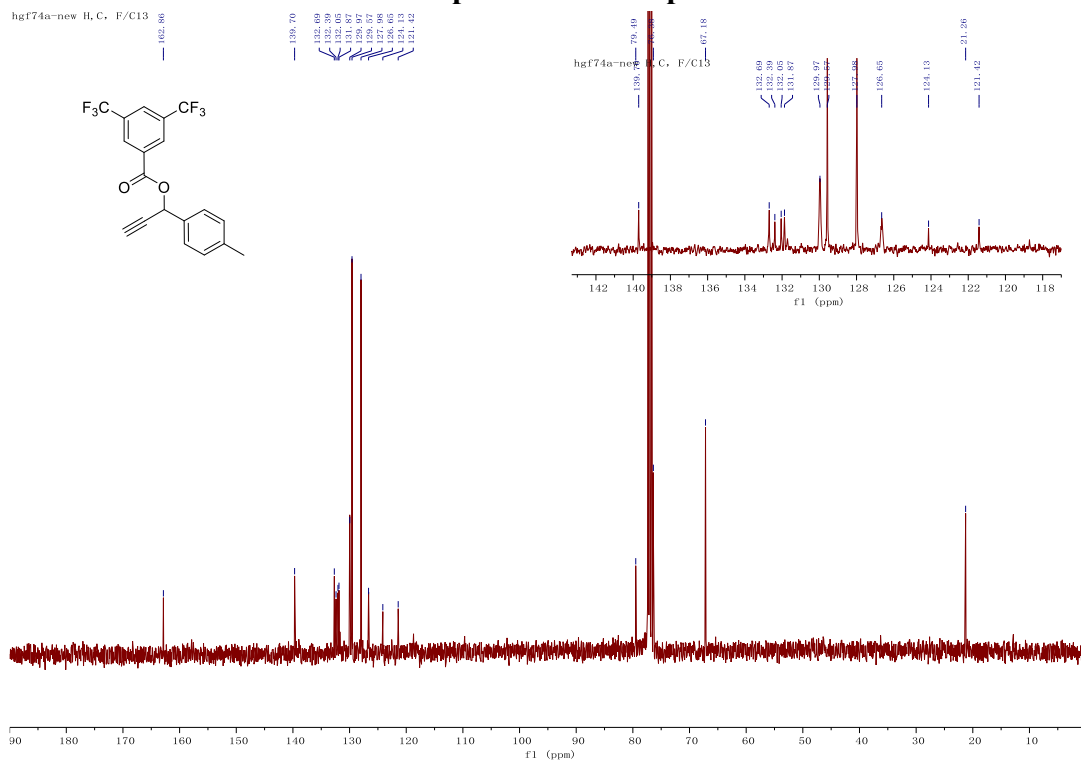

### <sup>19</sup>F NMR spectrum of compound 1d

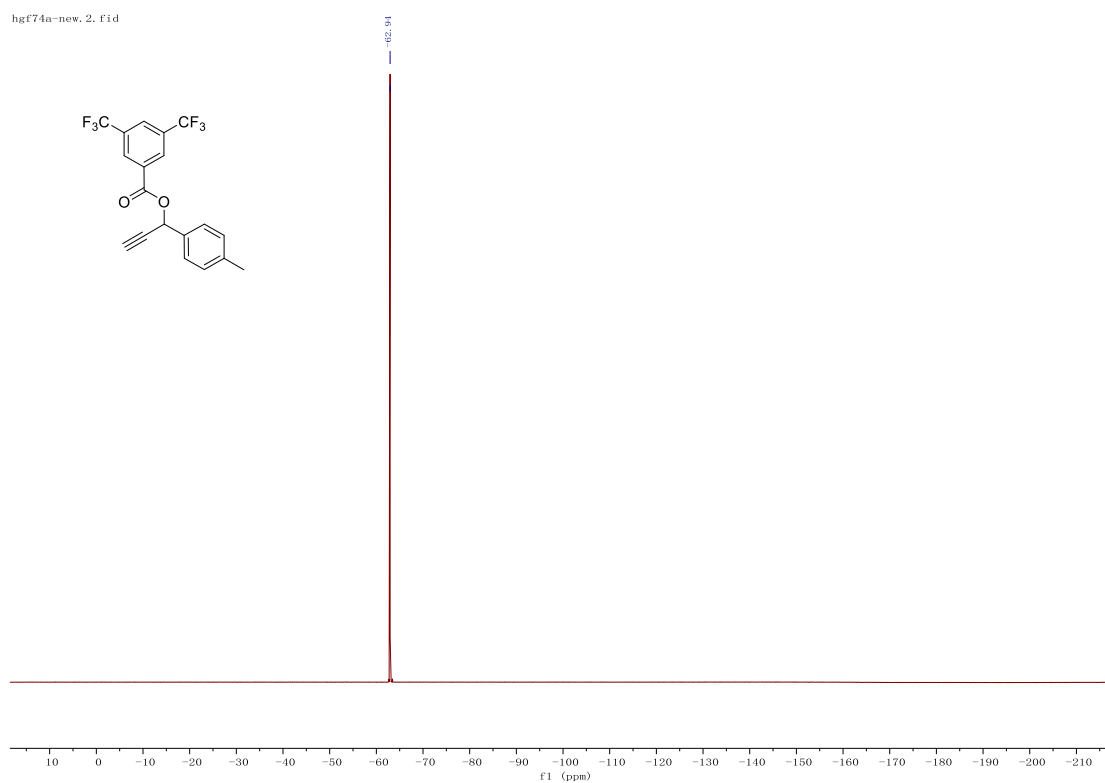

# <sup>1</sup>H NMR spectrum of compound 1e

hgf8bnwv\_4.f1d

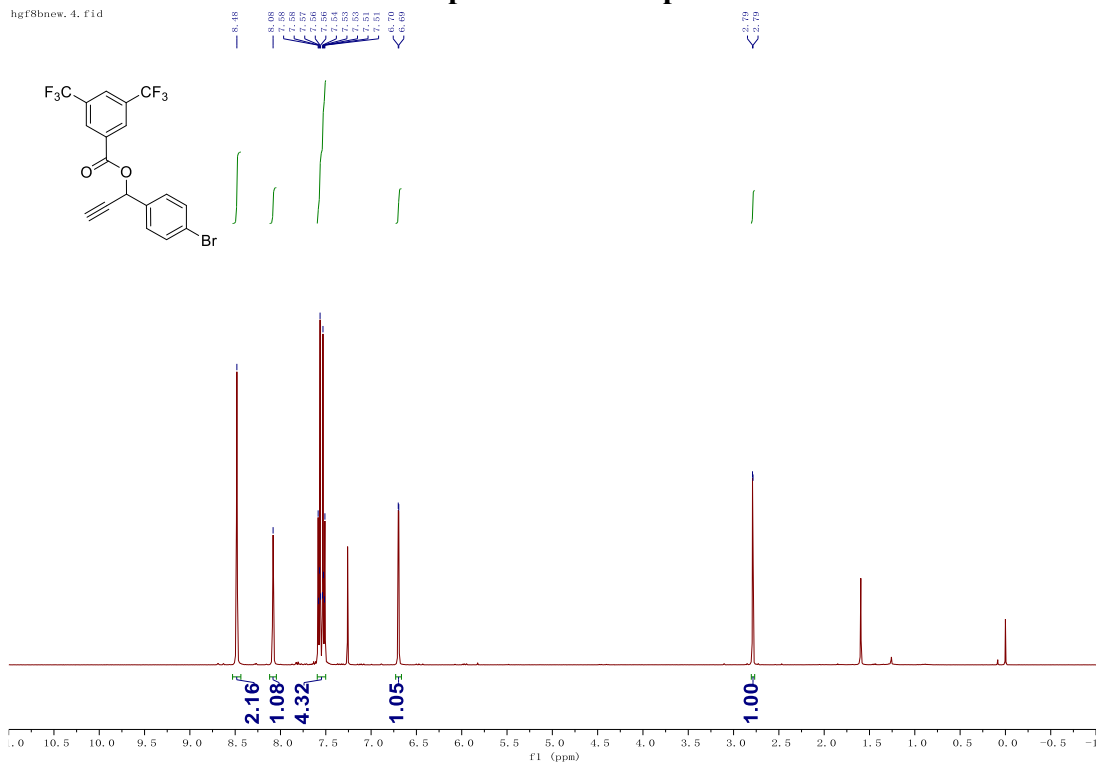

# <sup>13</sup>C NMR spectrum of compound 1e

hgf8bnwv\_H, C, F/C13

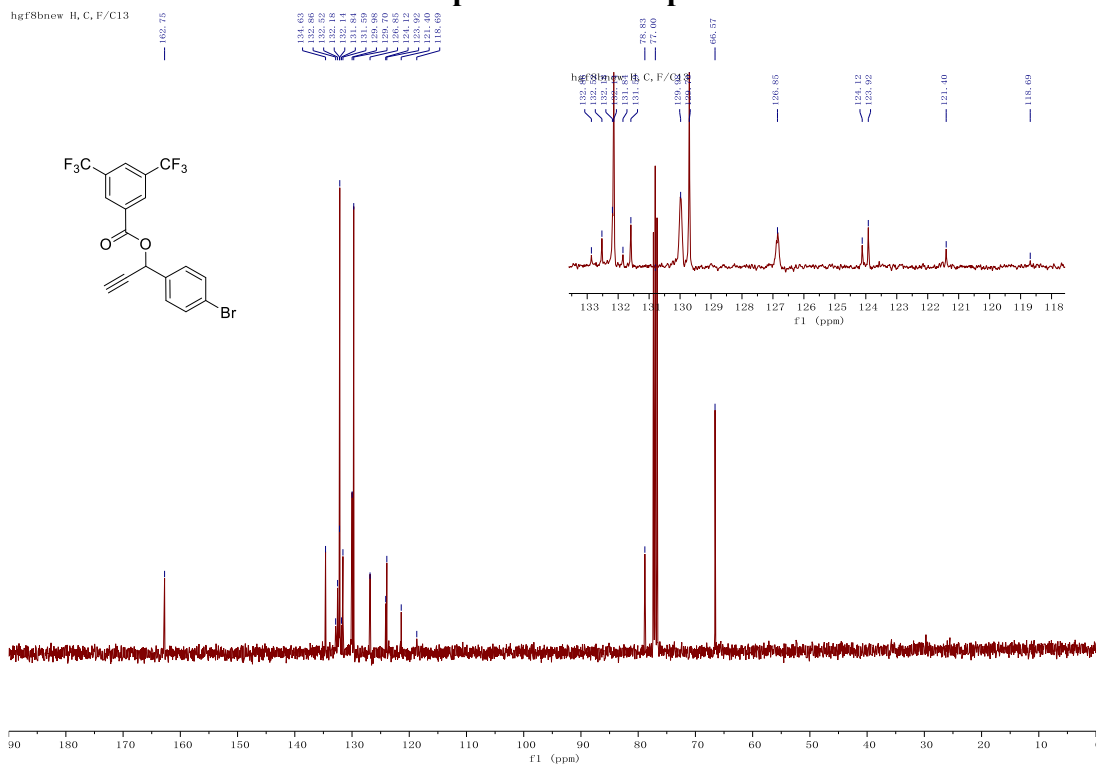

# <sup>19</sup>F NMR spectrum of compound 1e

hgf8bnwv.3.fid

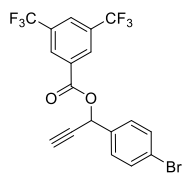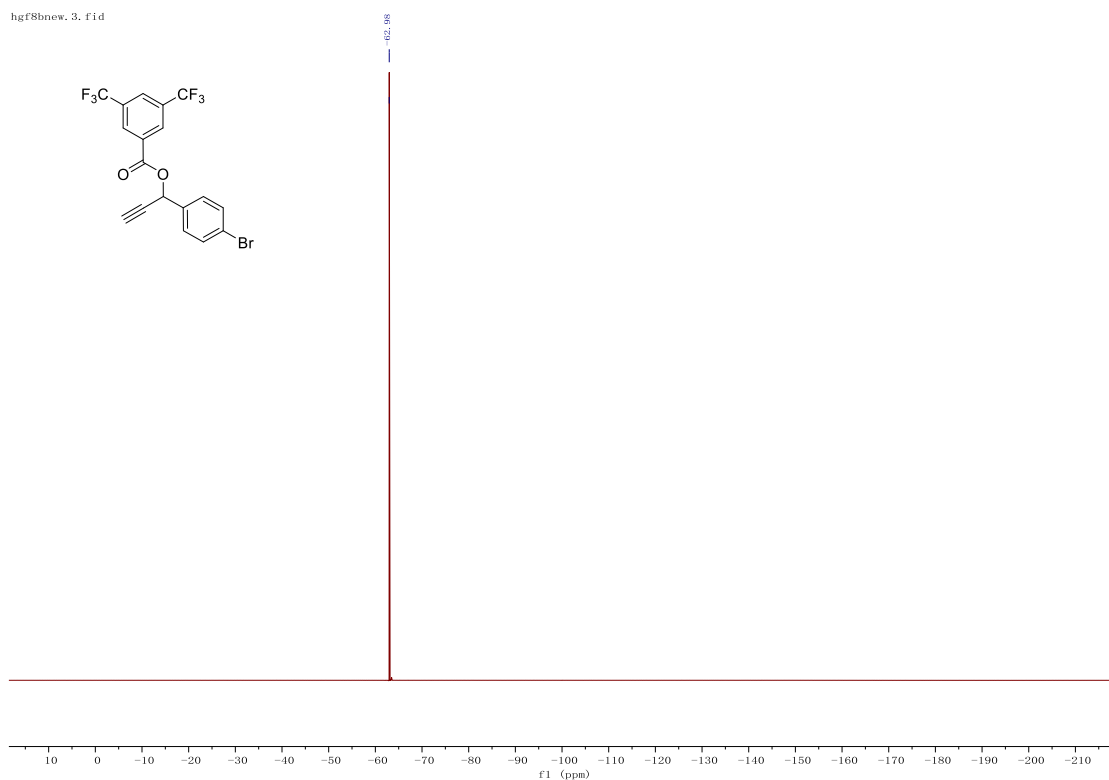

# <sup>1</sup>H NMR spectrum of compound 1f

hgf30a-new.1.fid

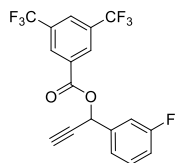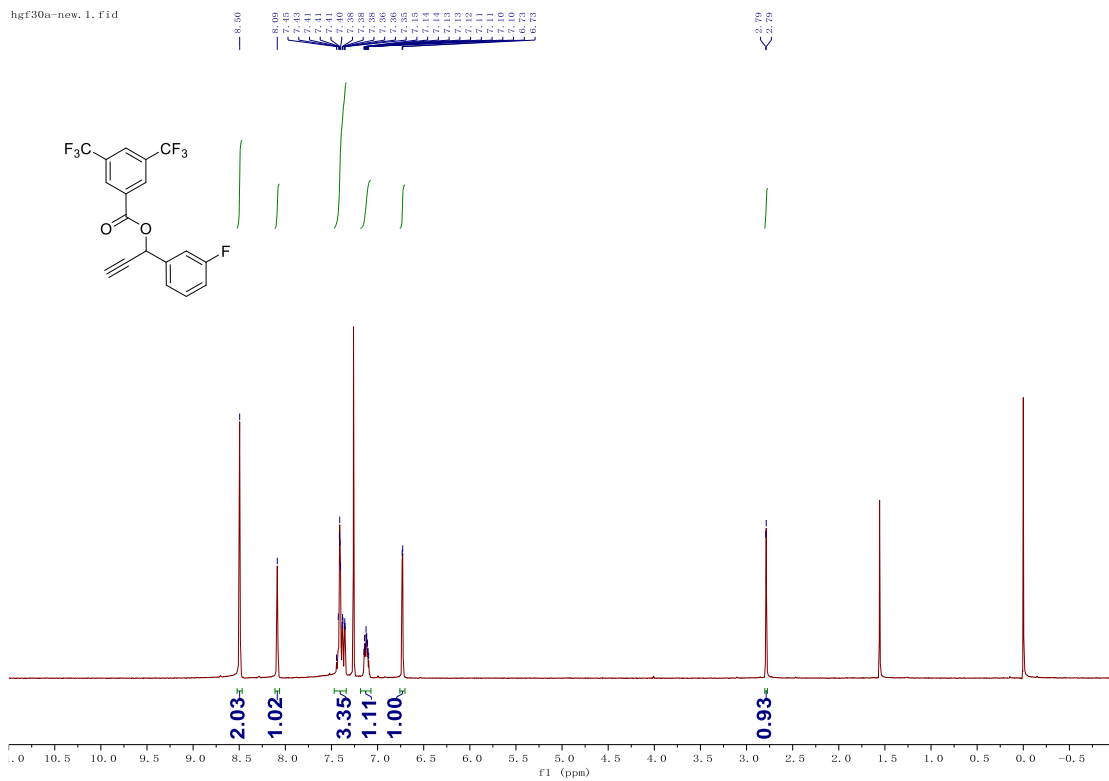



# <sup>1</sup>H NMR spectrum of compound 1g

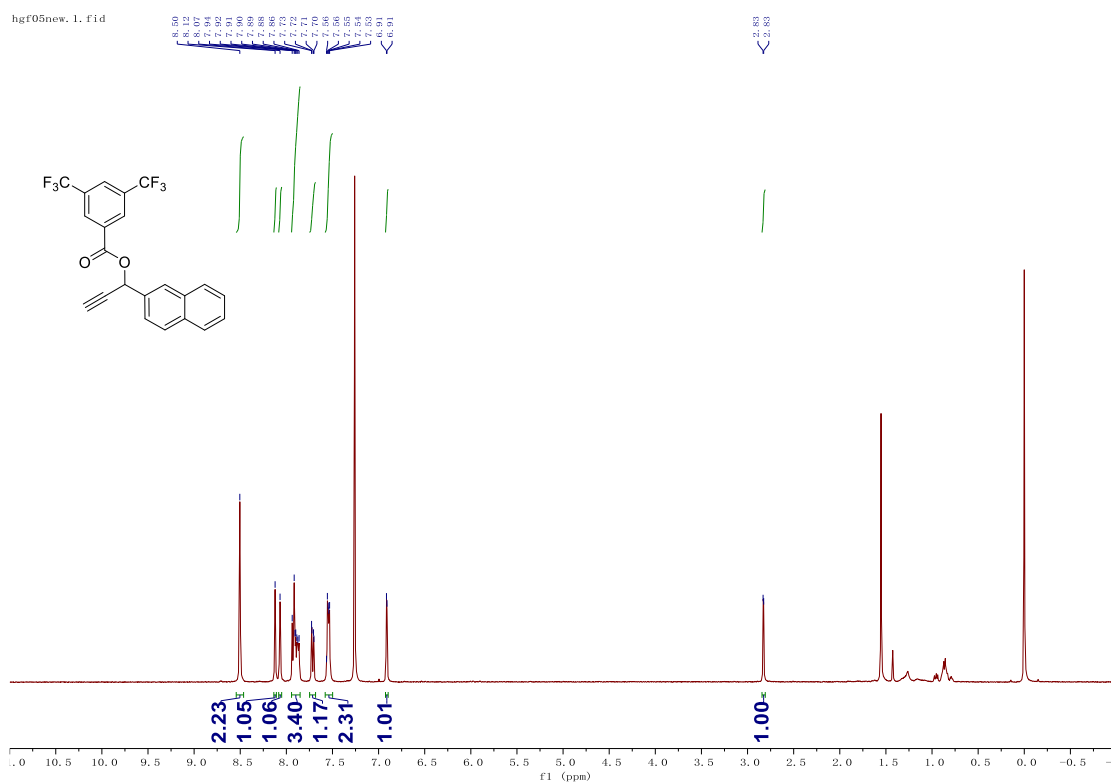

# <sup>13</sup>C NMR spectrum of compound 1g

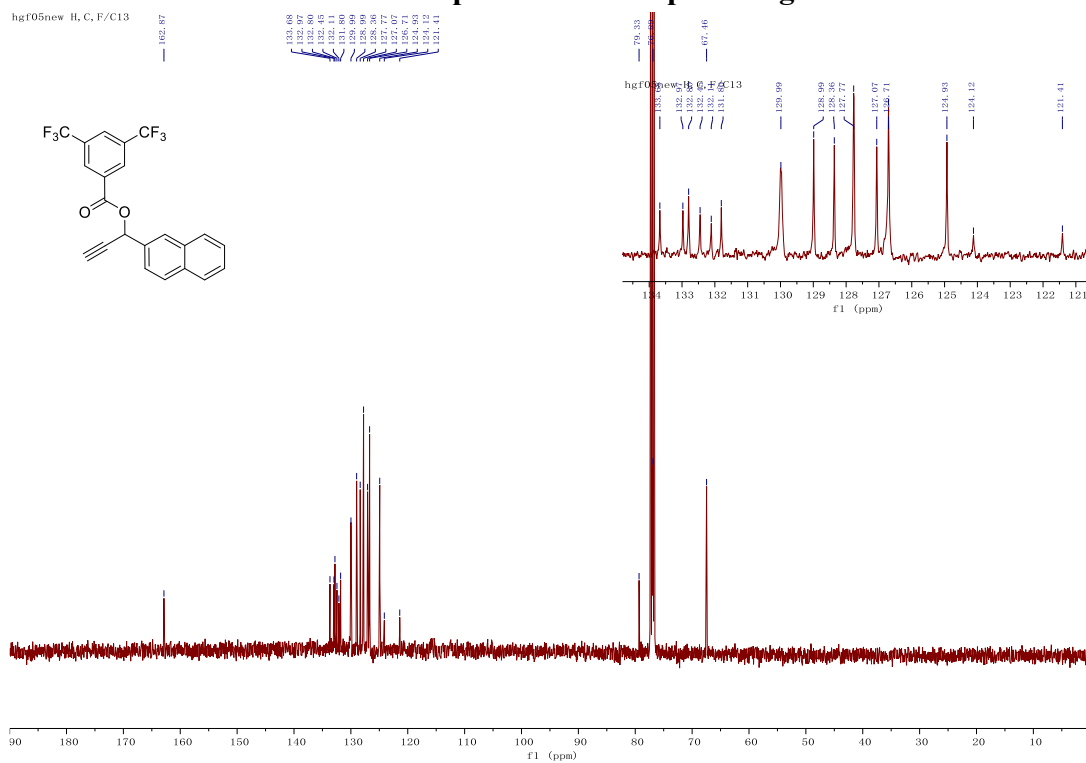

### <sup>19</sup>F NMR spectrum of compound 1g

hg105new. 2. f1d

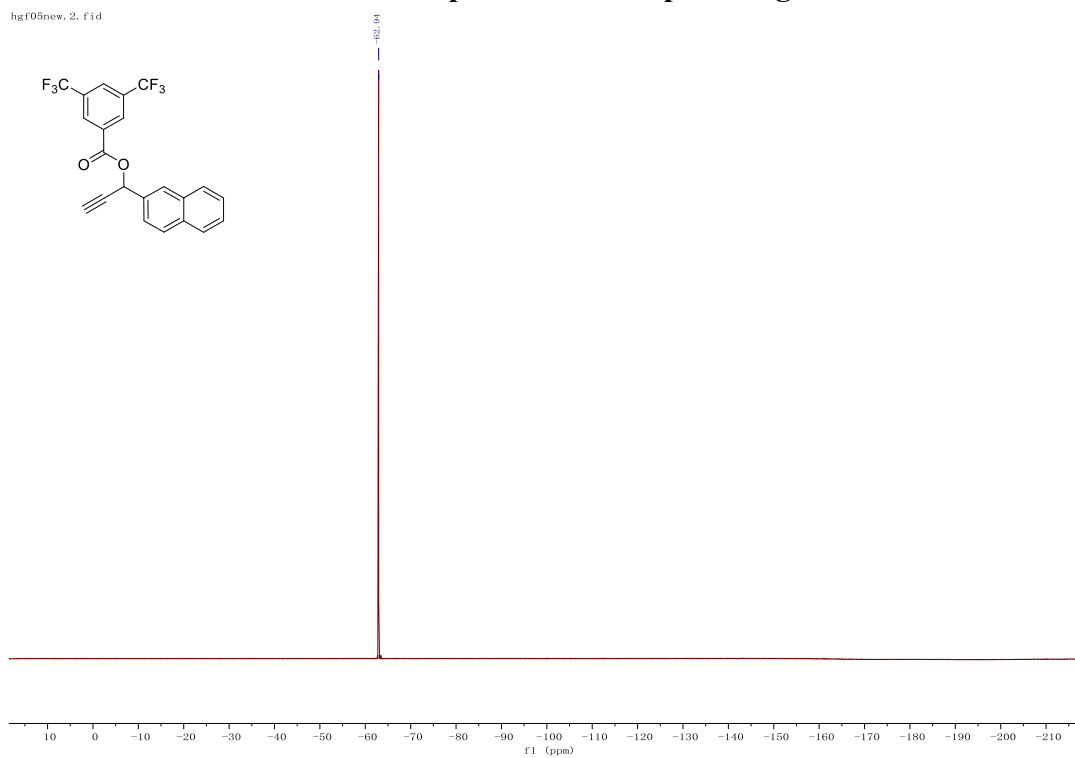

### <sup>1</sup>H NMR spectrum of compound 1h

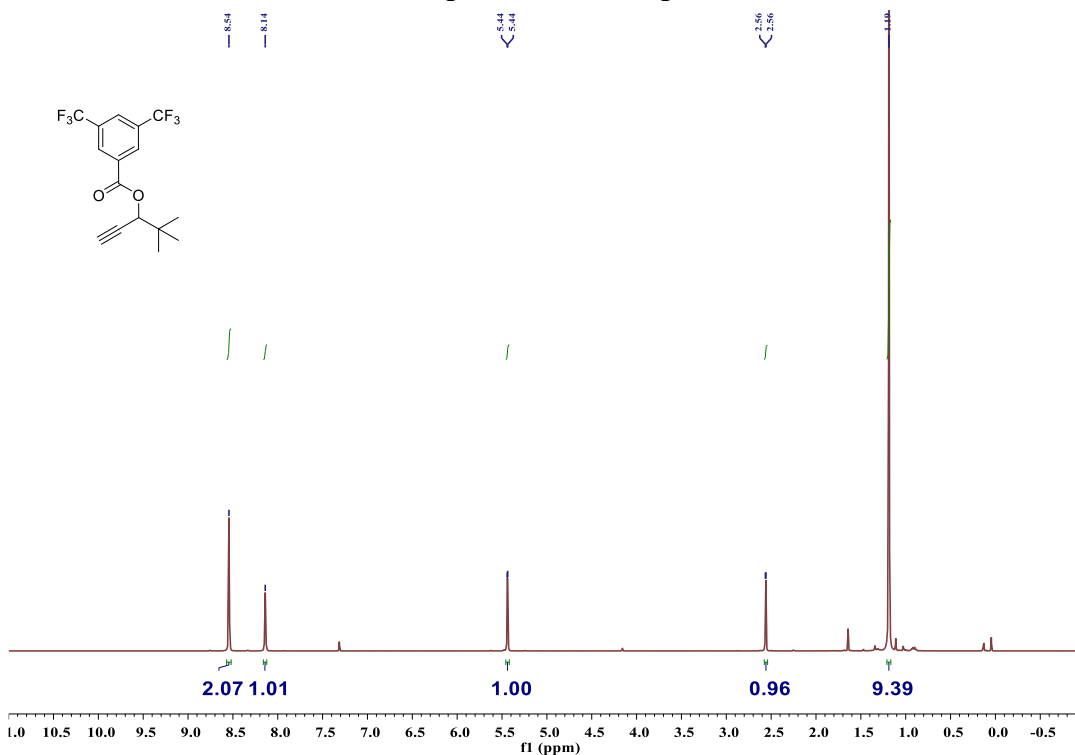

### <sup>13</sup>C NMR spectrum of compound 1h

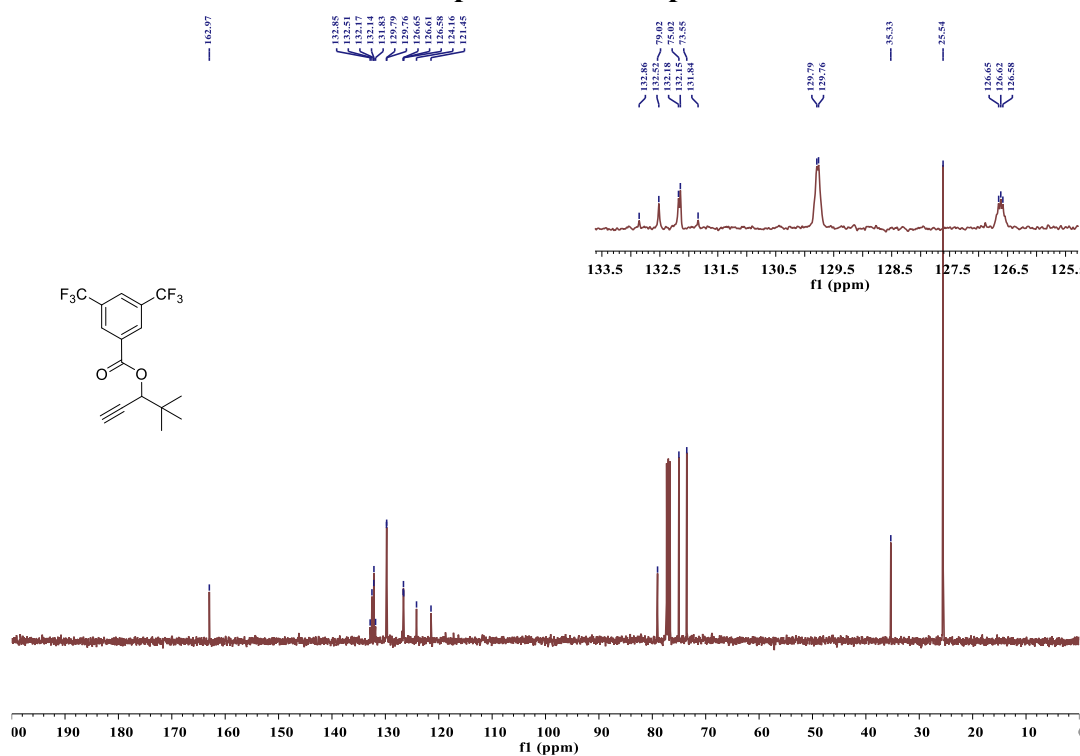

### <sup>19</sup>F NMR spectrum of compound 1h

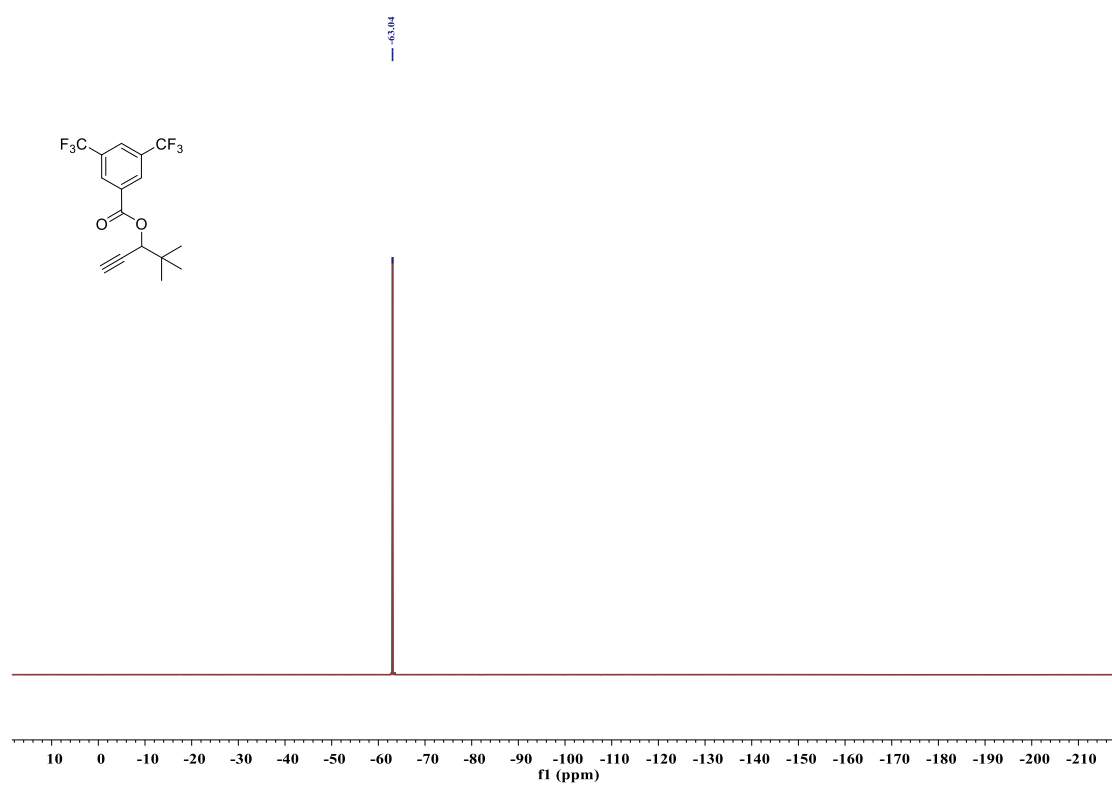

### <sup>1</sup>H NMR spectrum of compound 1i

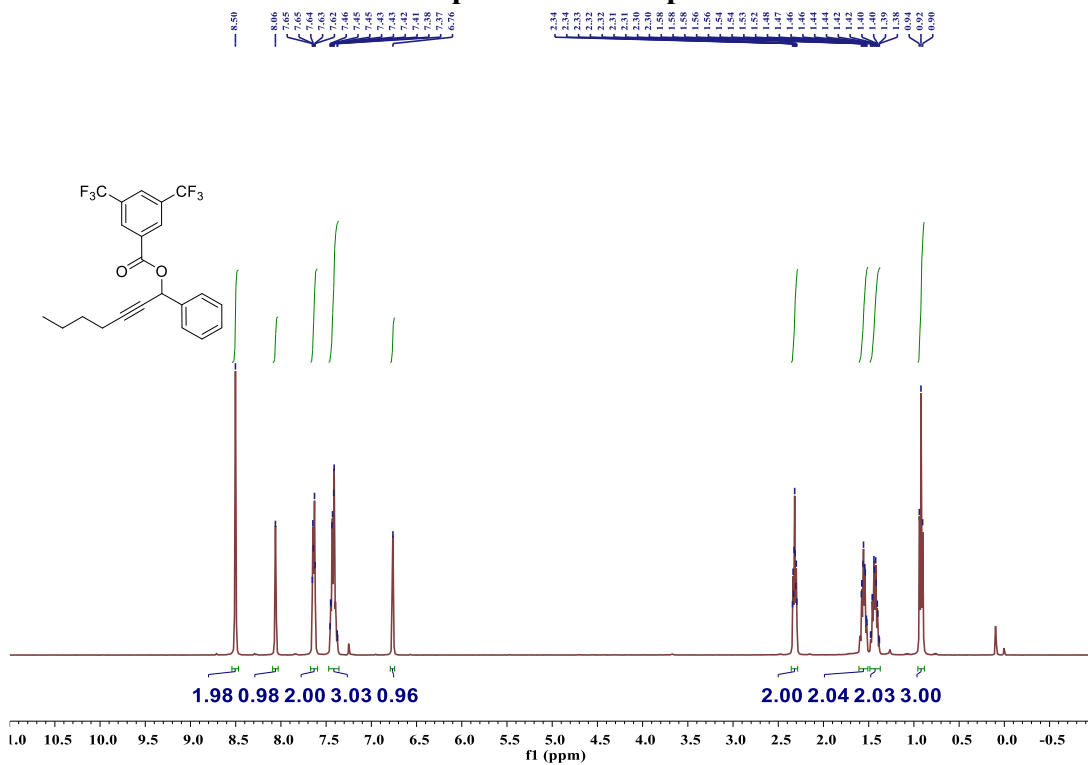

### <sup>13</sup>C NMR spectrum of compound 1i

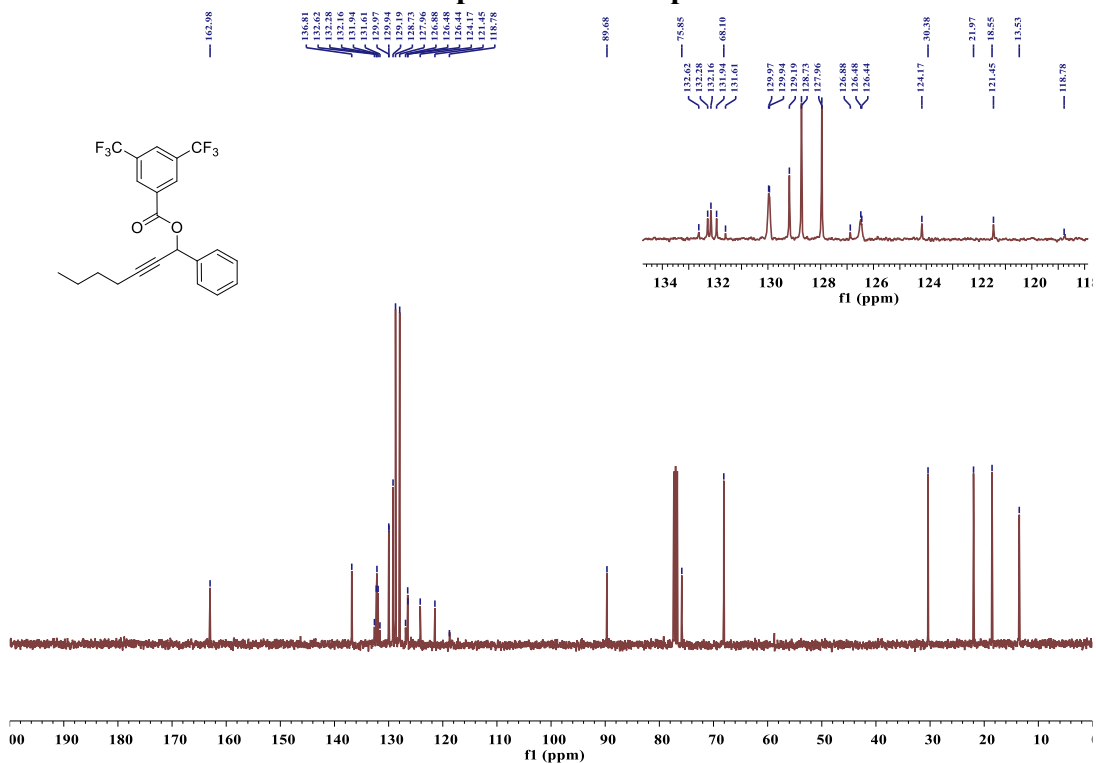



### <sup>19</sup>F NMR spectrum of compound 1i

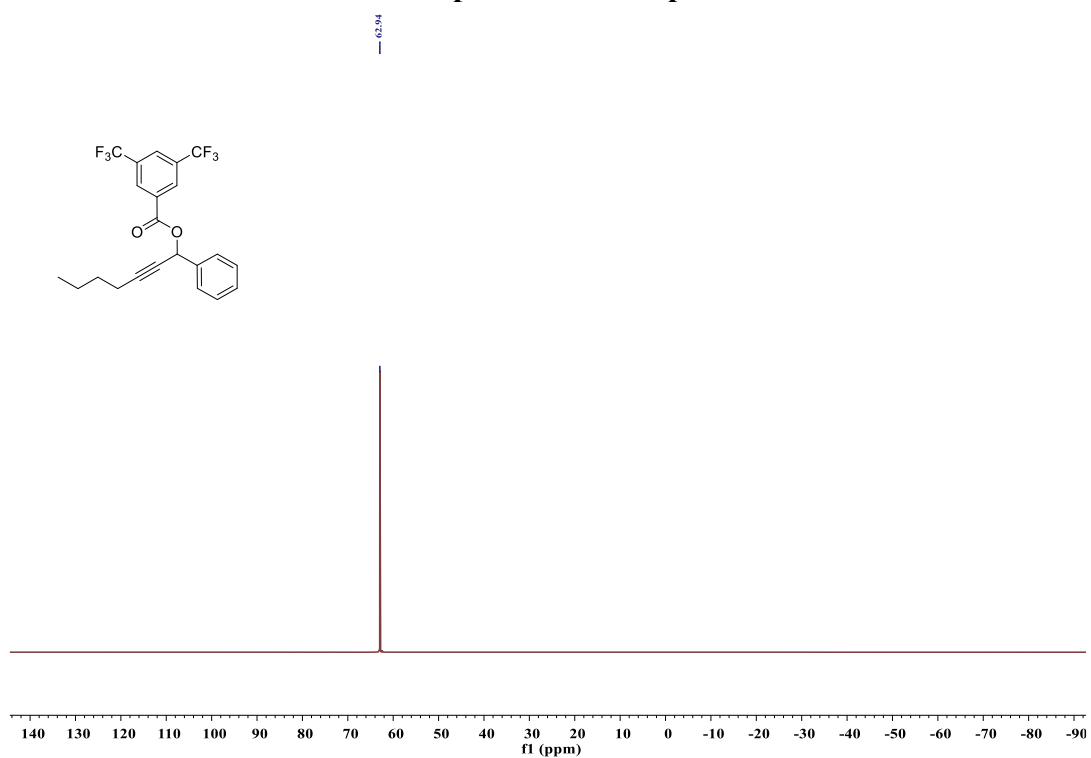

### <sup>1</sup>H NMR spectrum of compound 1j

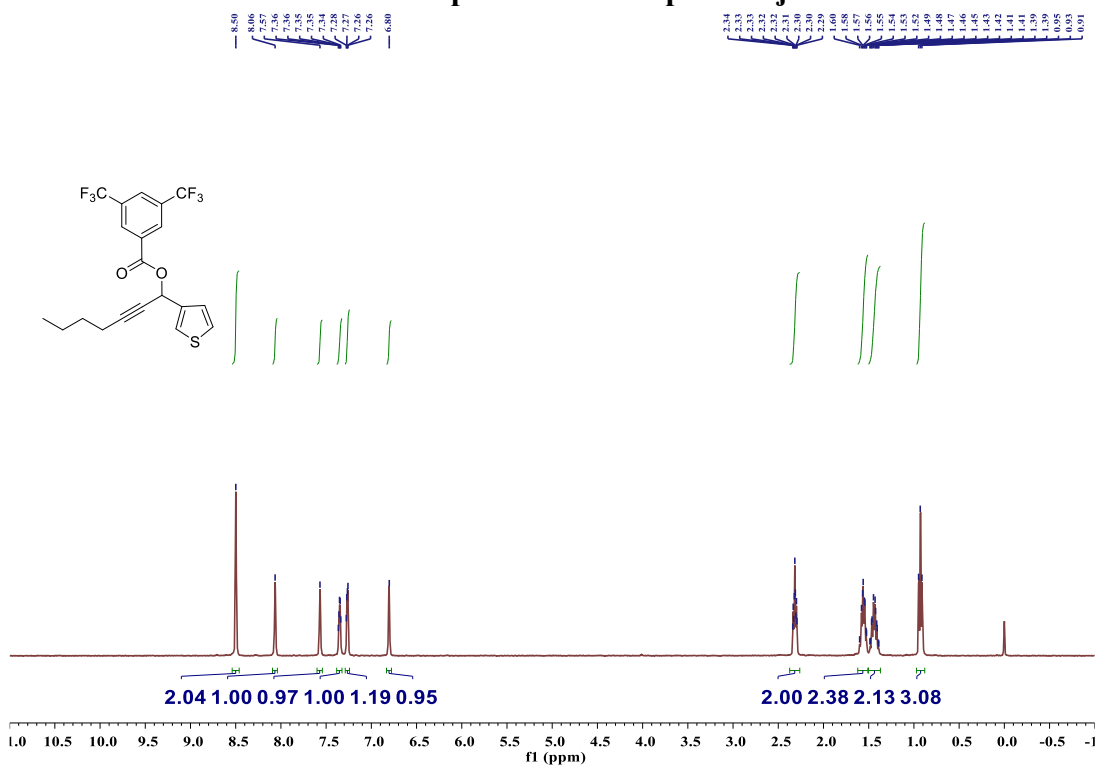

### <sup>13</sup>C NMR spectrum of compound 1j

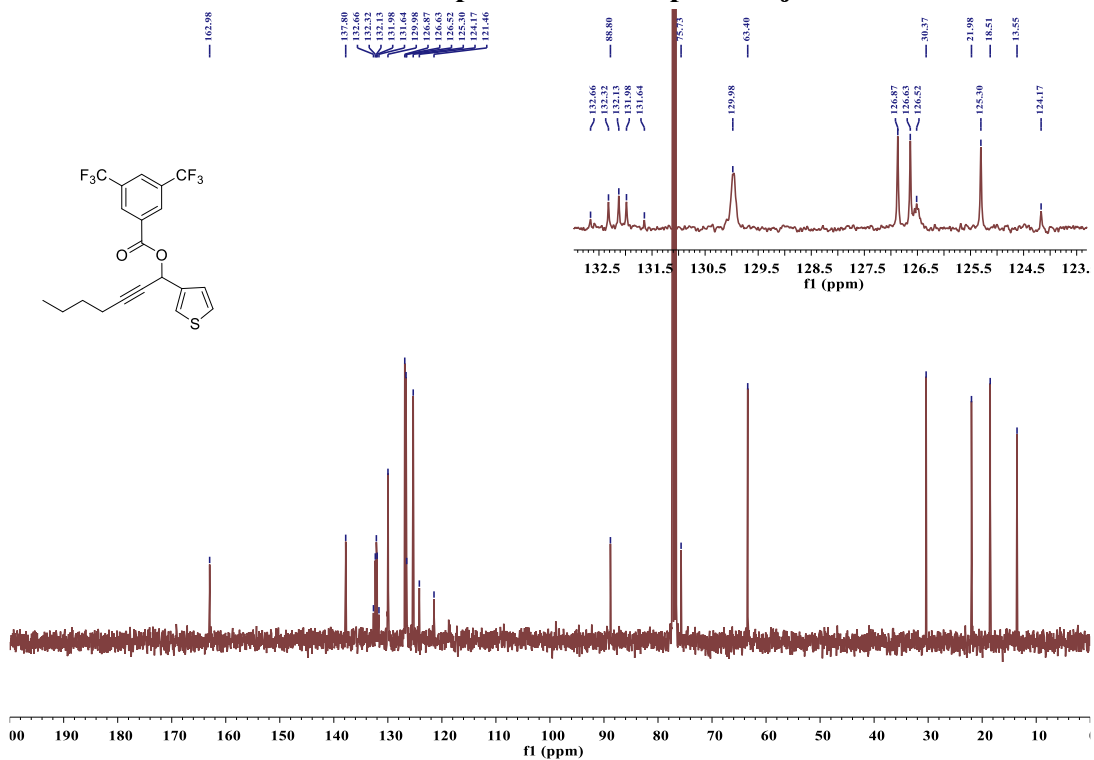

### <sup>19</sup>F NMR spectrum of compound 1j

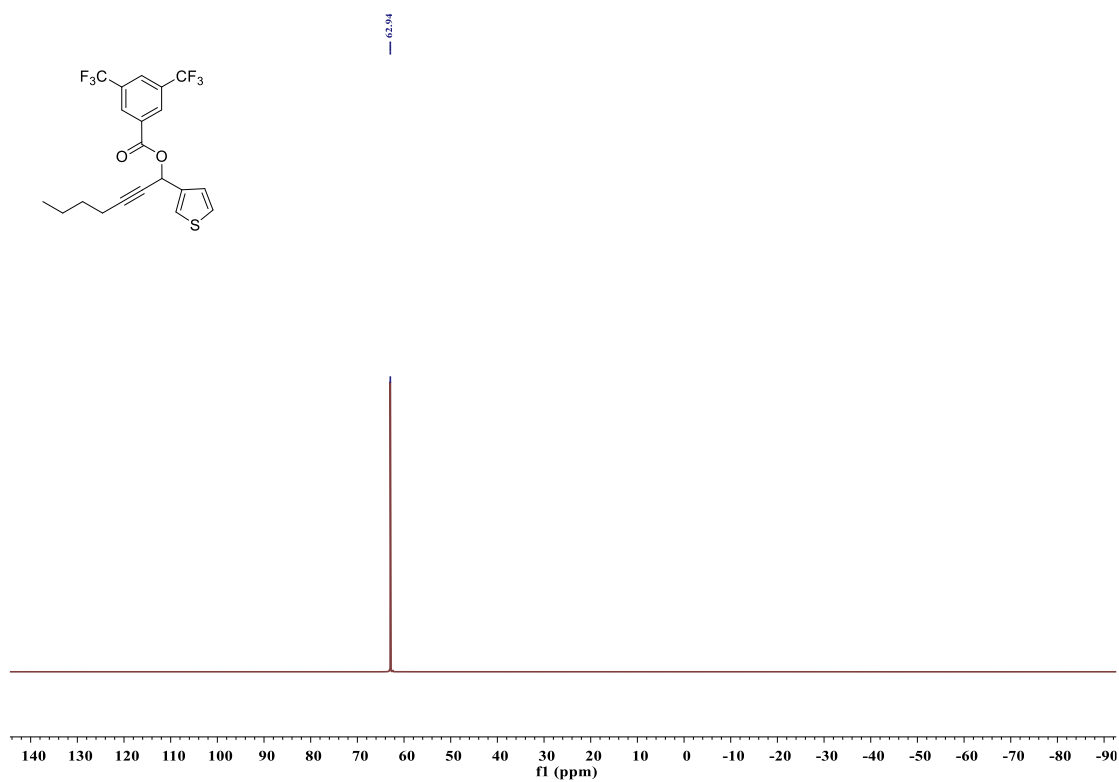



# <sup>19</sup>F NMR spectrum of compound 1k

HGF23new. 2. fid

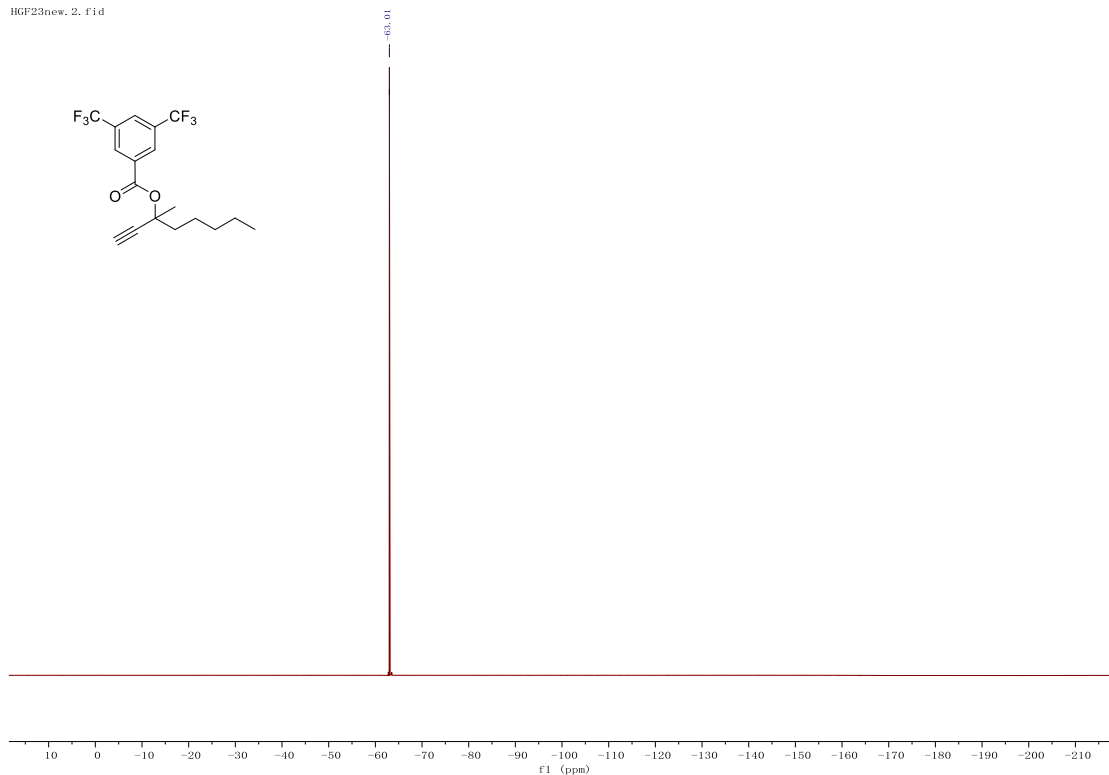

# <sup>1</sup>H NMR spectrum of compound 1l

1fd632new. 1. fid

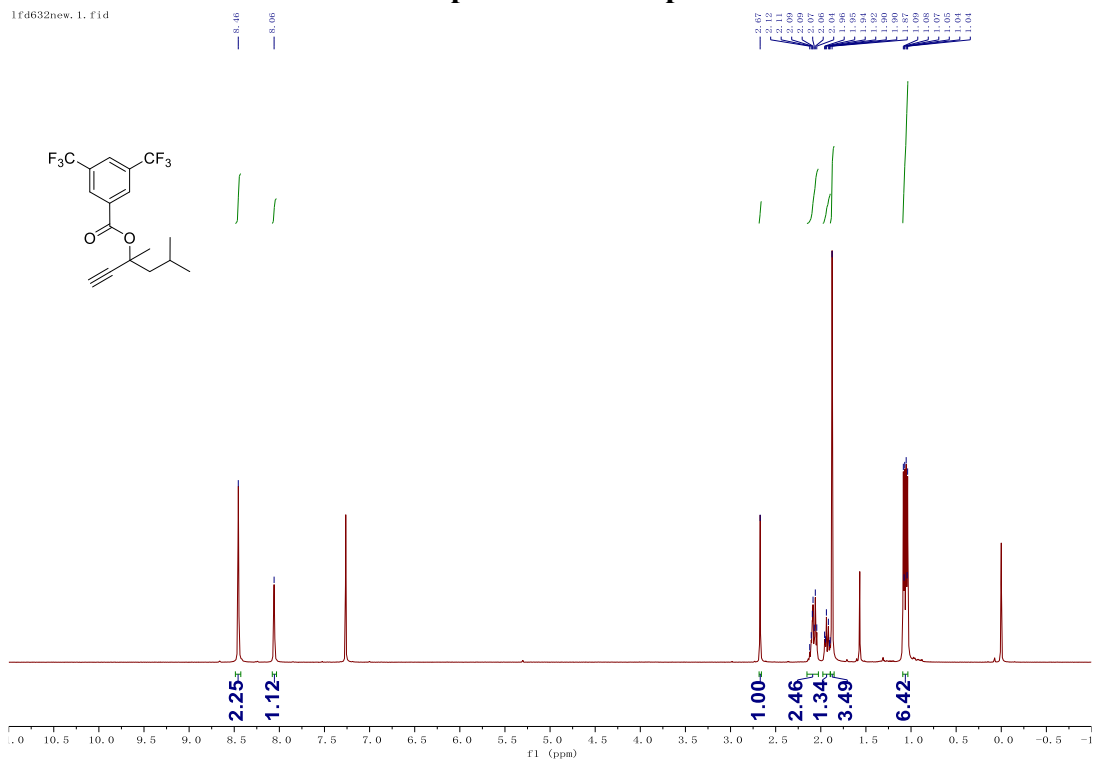

### <sup>13</sup>C NMR spectrum of compound 11

1fd632bnew H, C, F/C13

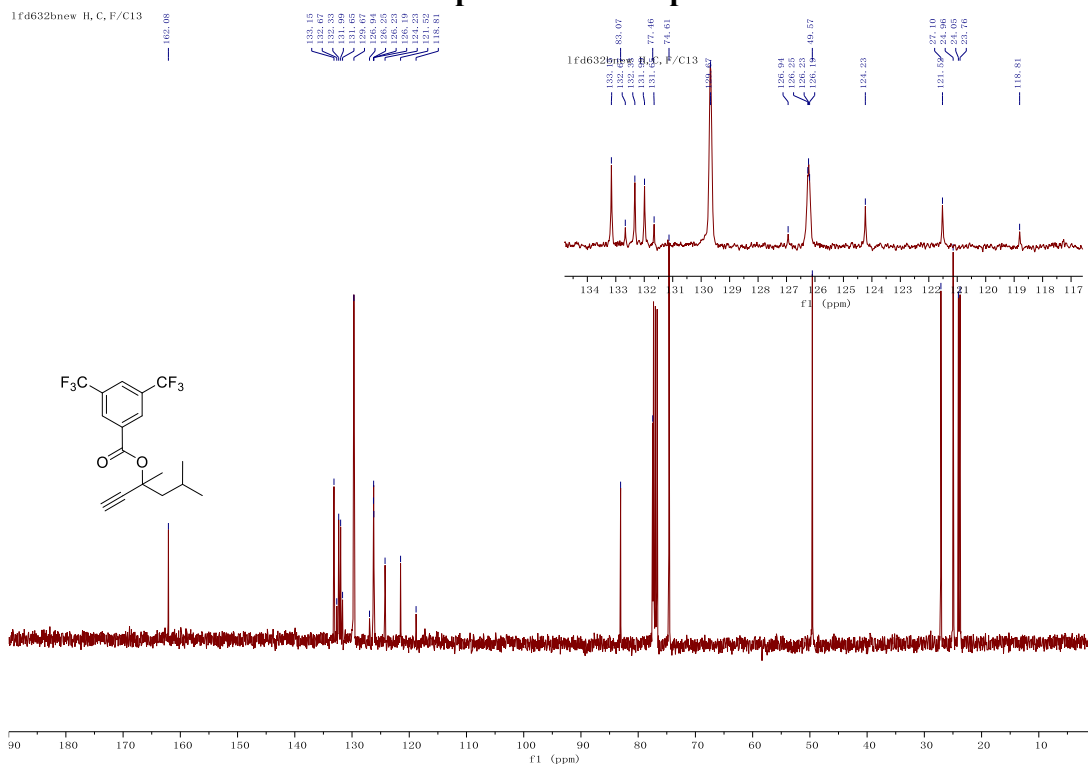

### <sup>19</sup>F NMR spectrum of compound 11

1fd632bnew. 2. fid

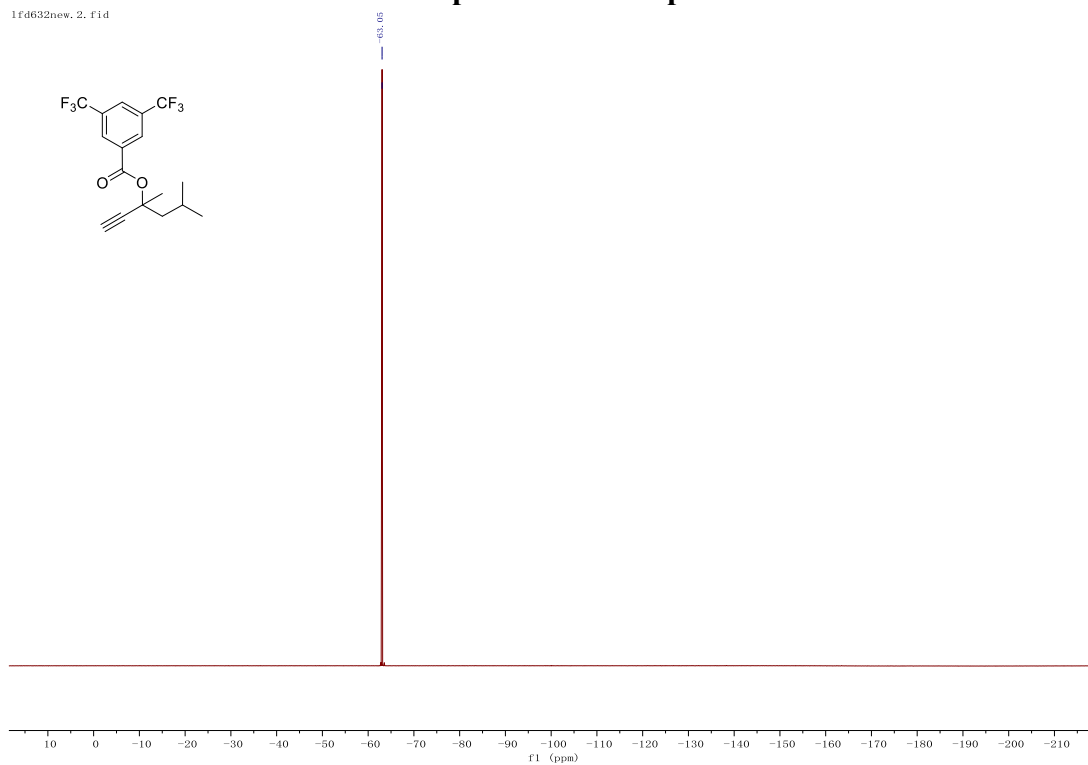

### <sup>1</sup>H NMR spectrum of compound 1m

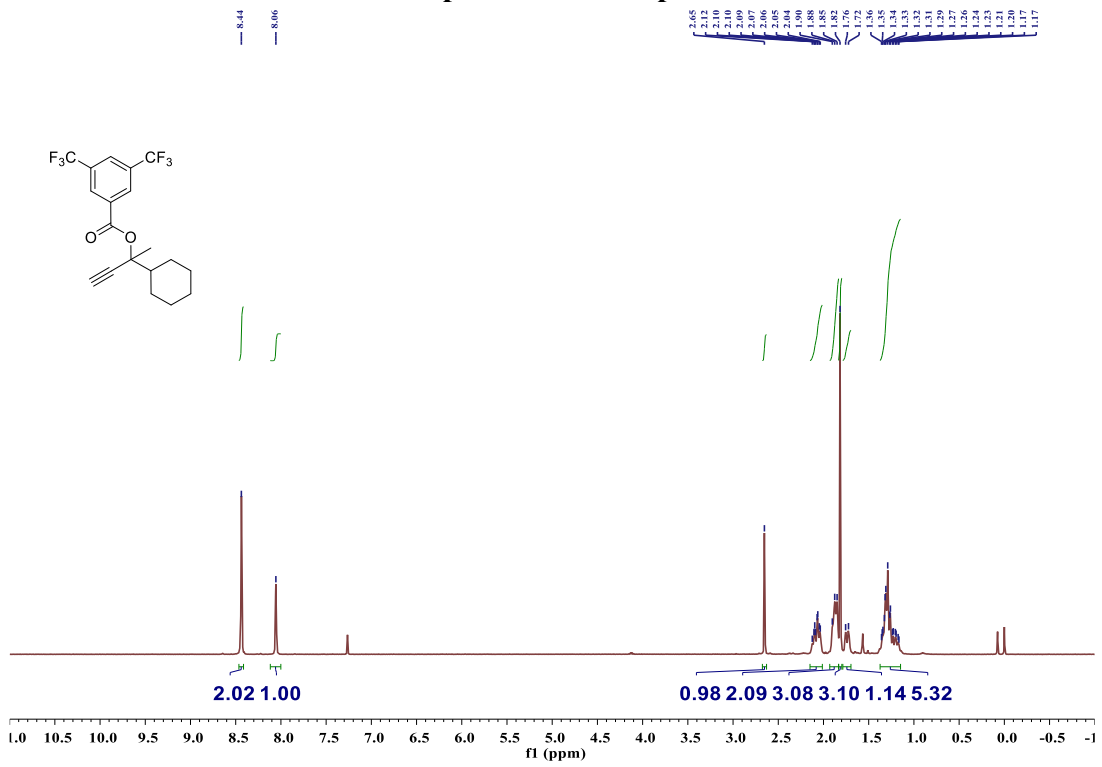

### <sup>13</sup>C NMR spectrum of compound 1m

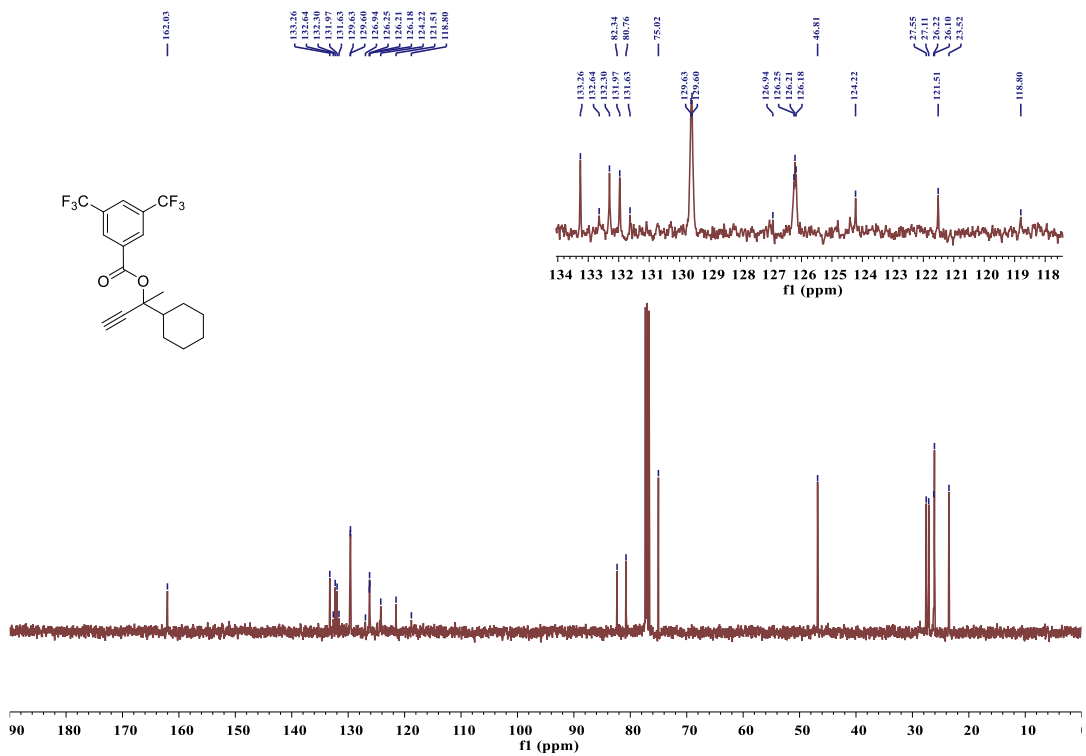

### <sup>19</sup>F NMR spectrum of compound 1m

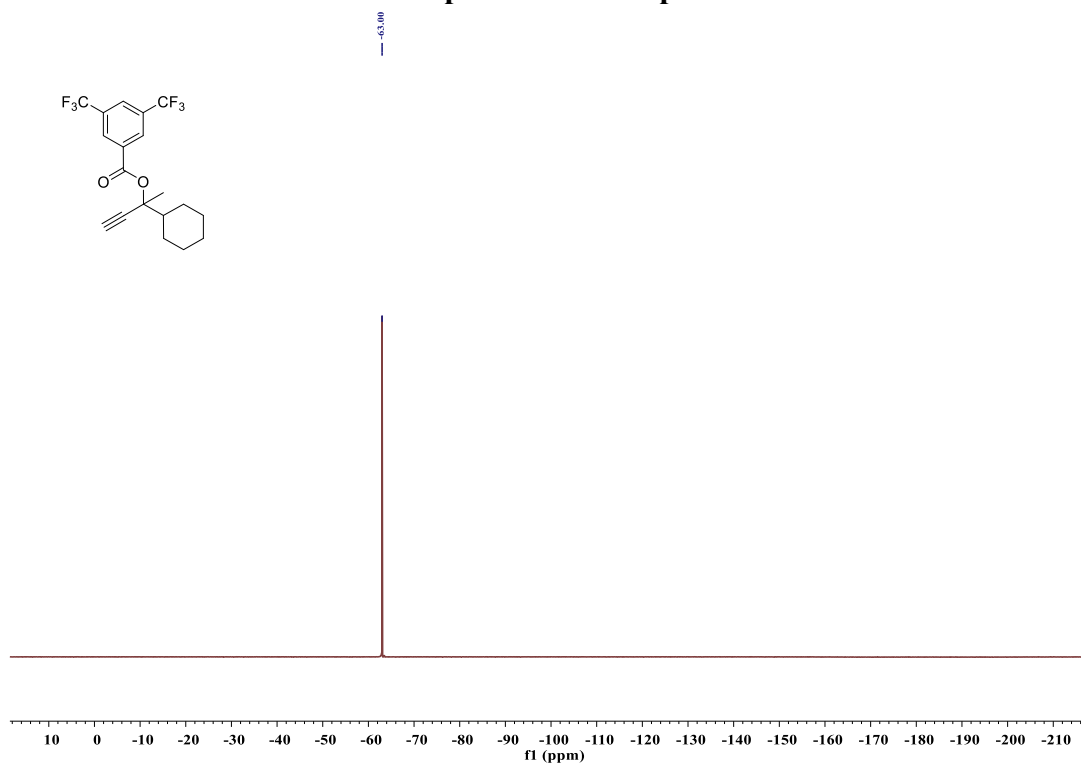

### <sup>1</sup>H NMR spectrum of compound 1n

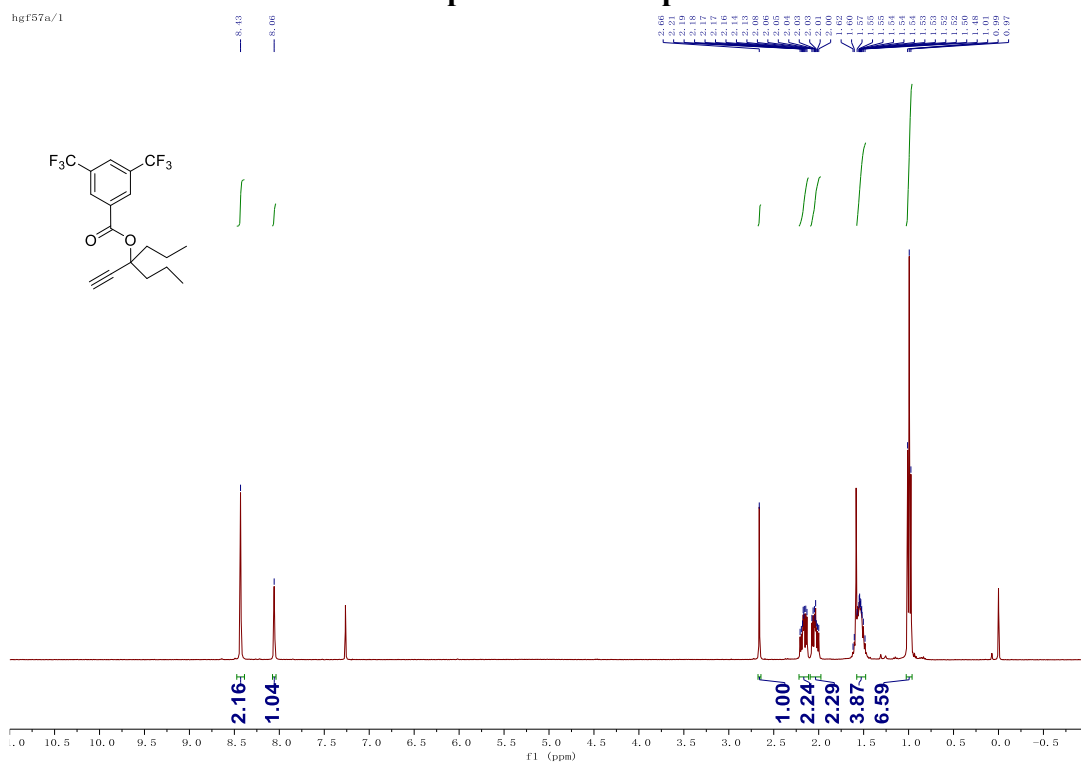





# <sup>1</sup>H NMR spectrum of compound 1o

hgF56/1

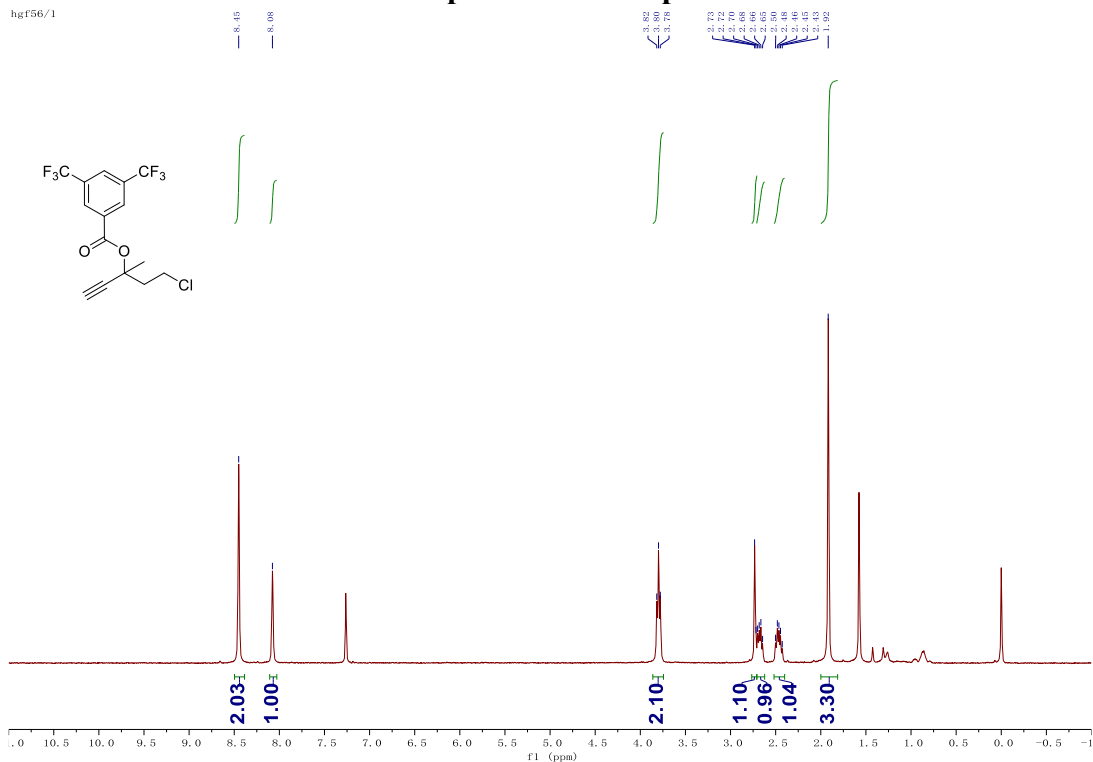

# <sup>13</sup>C NMR spectrum of compound 1o

hgF56 H, C, F/C13

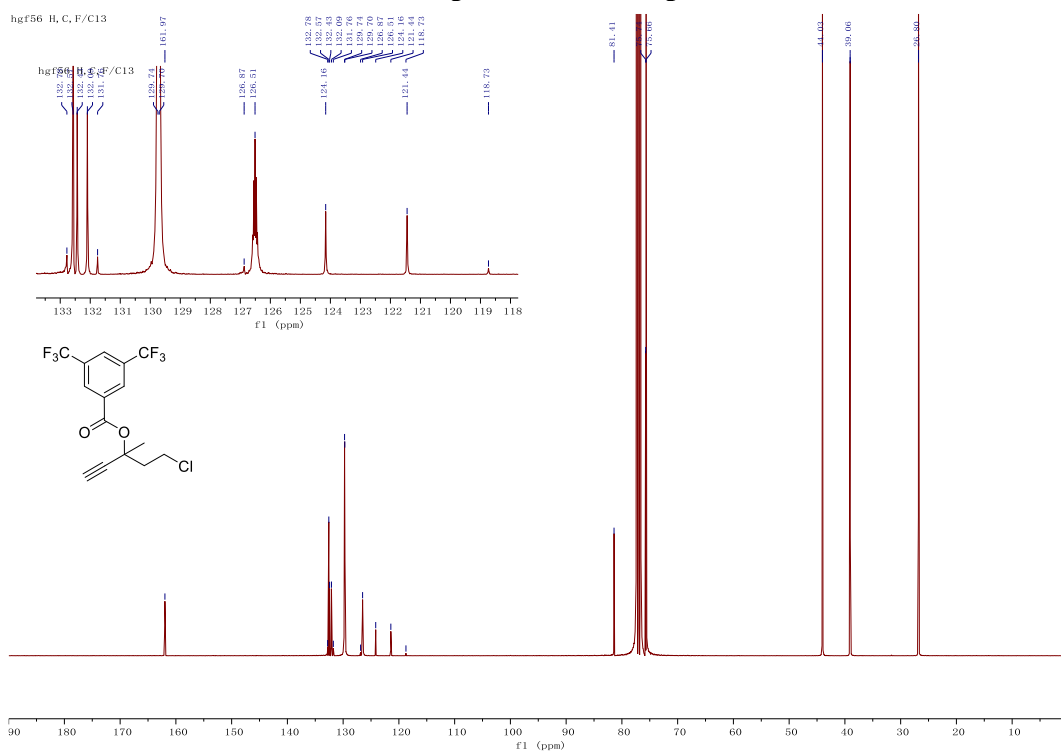

# <sup>19</sup>F NMR spectrum of compound 1o

hg156 H, C, F/F19

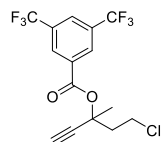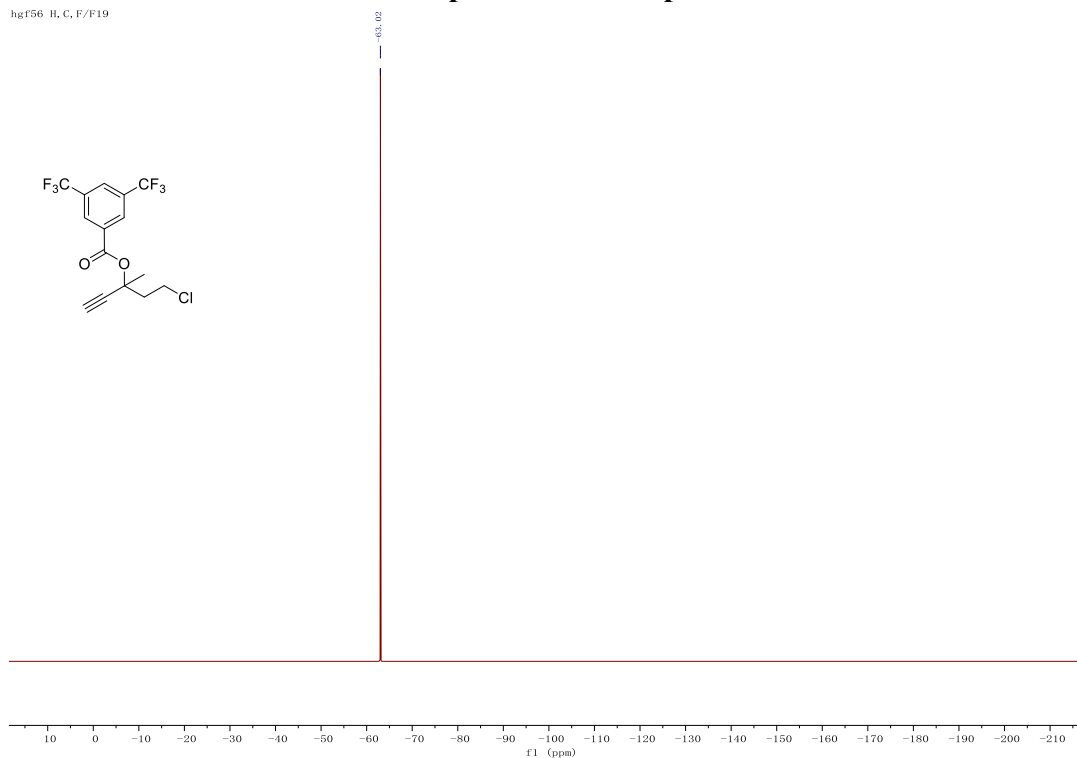

# <sup>1</sup>H NMR spectrum of compound 1p

HGF47new. 1. f1d

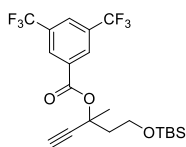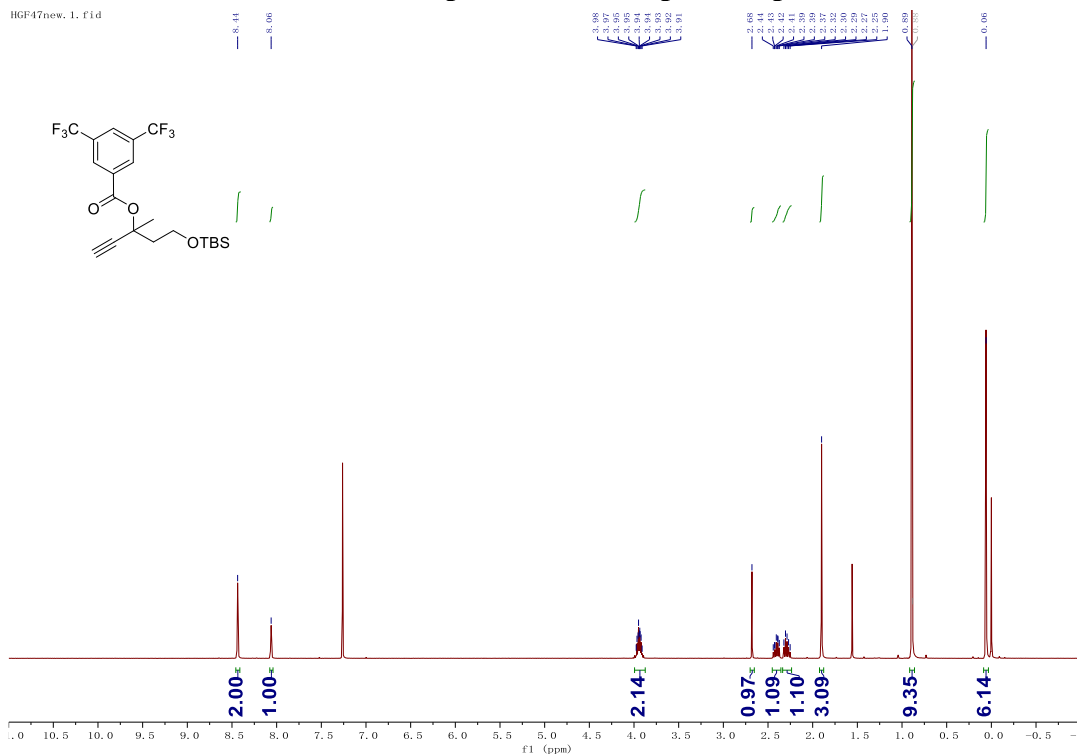

### <sup>13</sup>C NMR spectrum of compound 1p

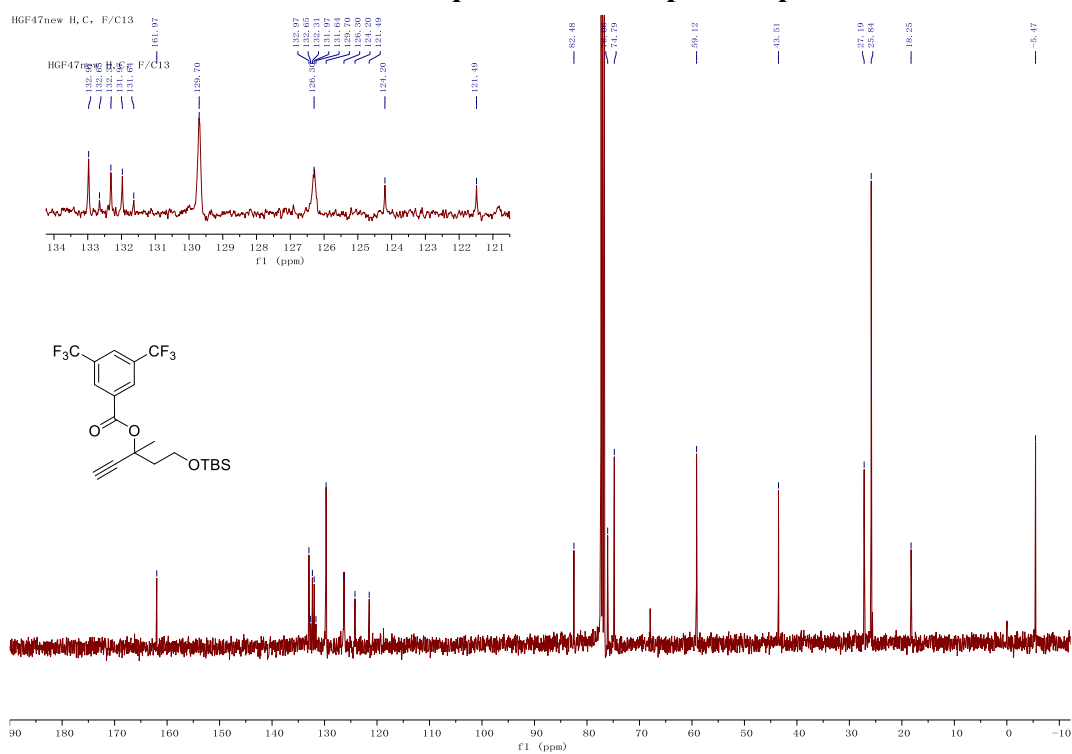

### <sup>19</sup>F NMR spectrum of compound 1p

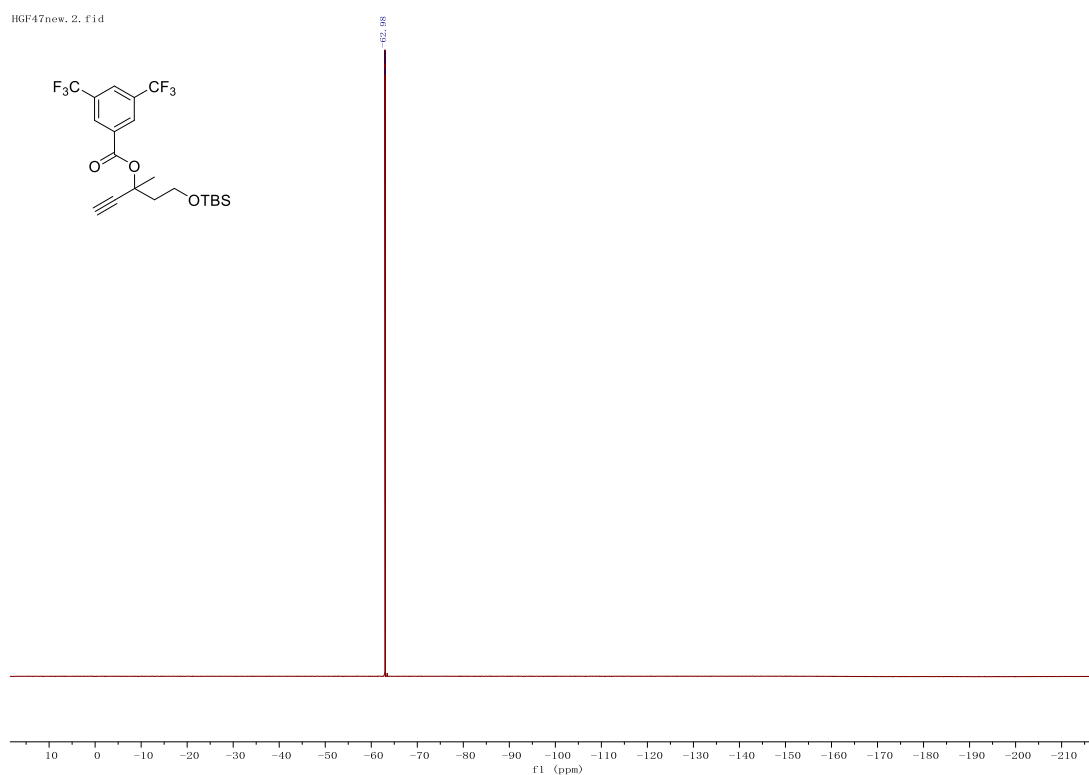

# <sup>1</sup>H NMR spectrum of compound 1q

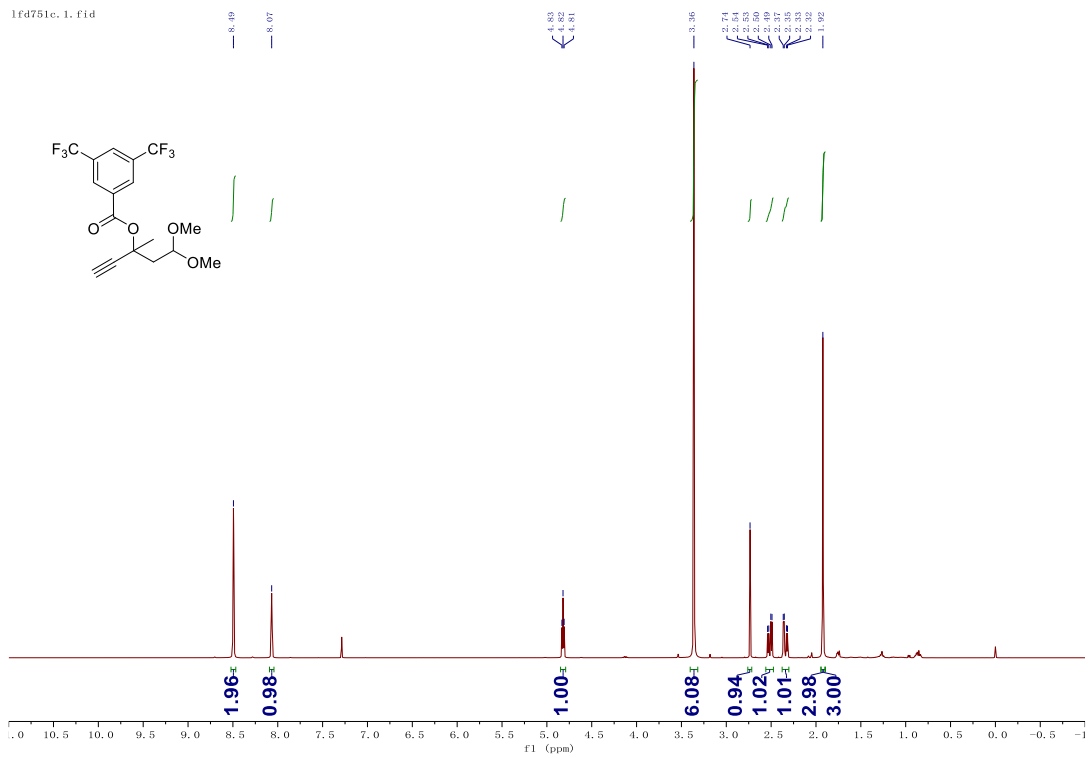

# <sup>13</sup>C NMR spectrum of compound 1q

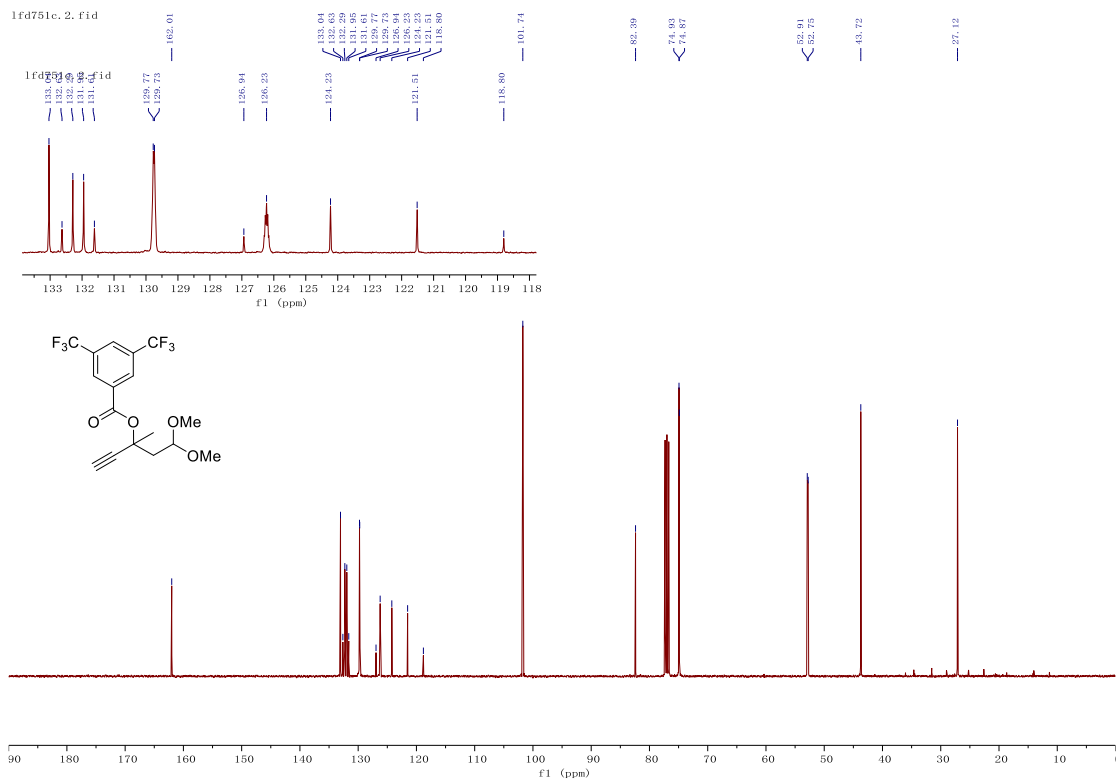

# <sup>19</sup>F NMR spectrum of compound 1q

1fd-651e. 1. F1d

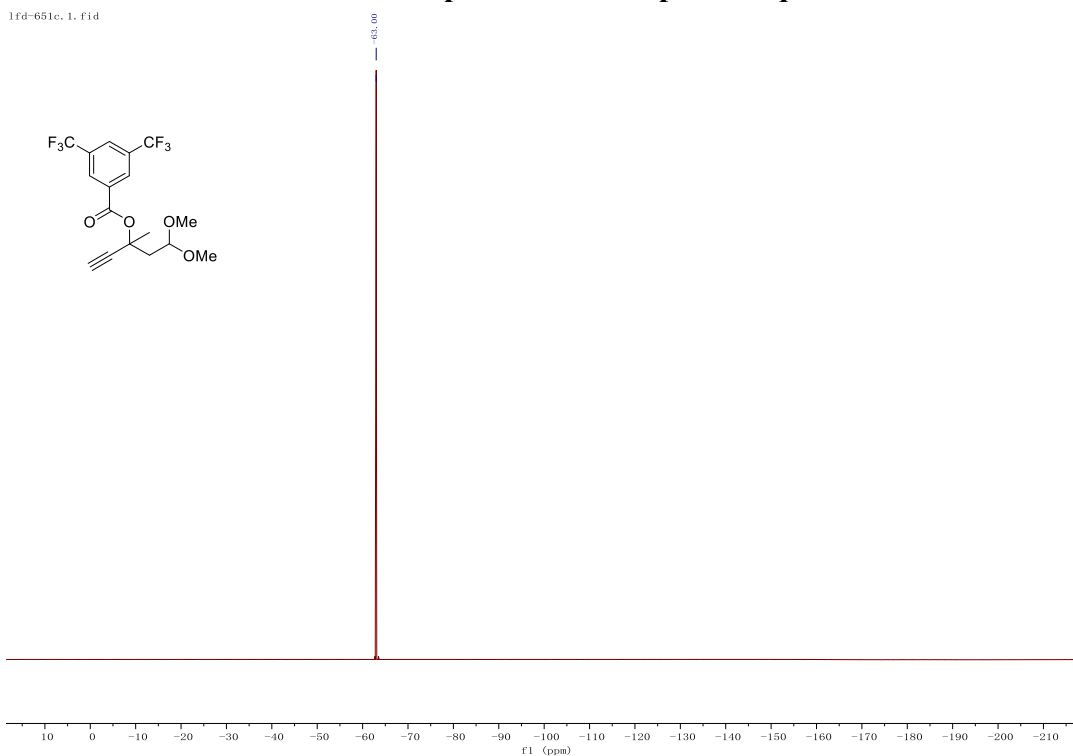

# <sup>1</sup>H NMR spectrum of compound 1r

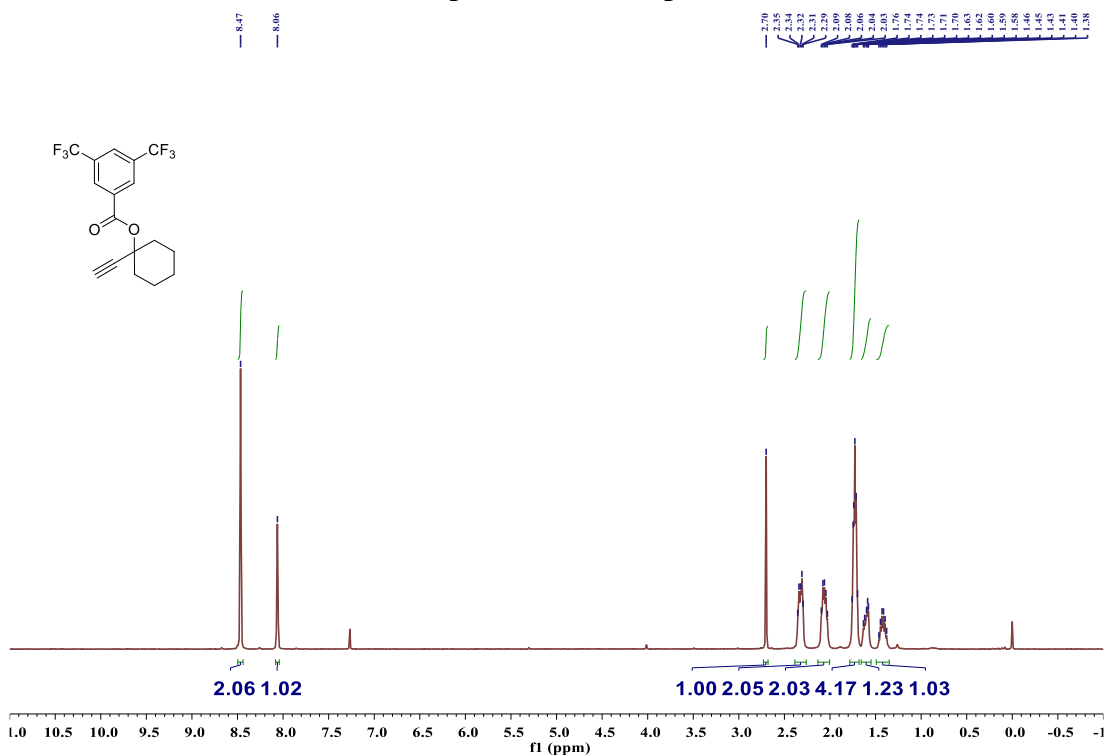

### <sup>13</sup>C NMR spectrum of compound 1r

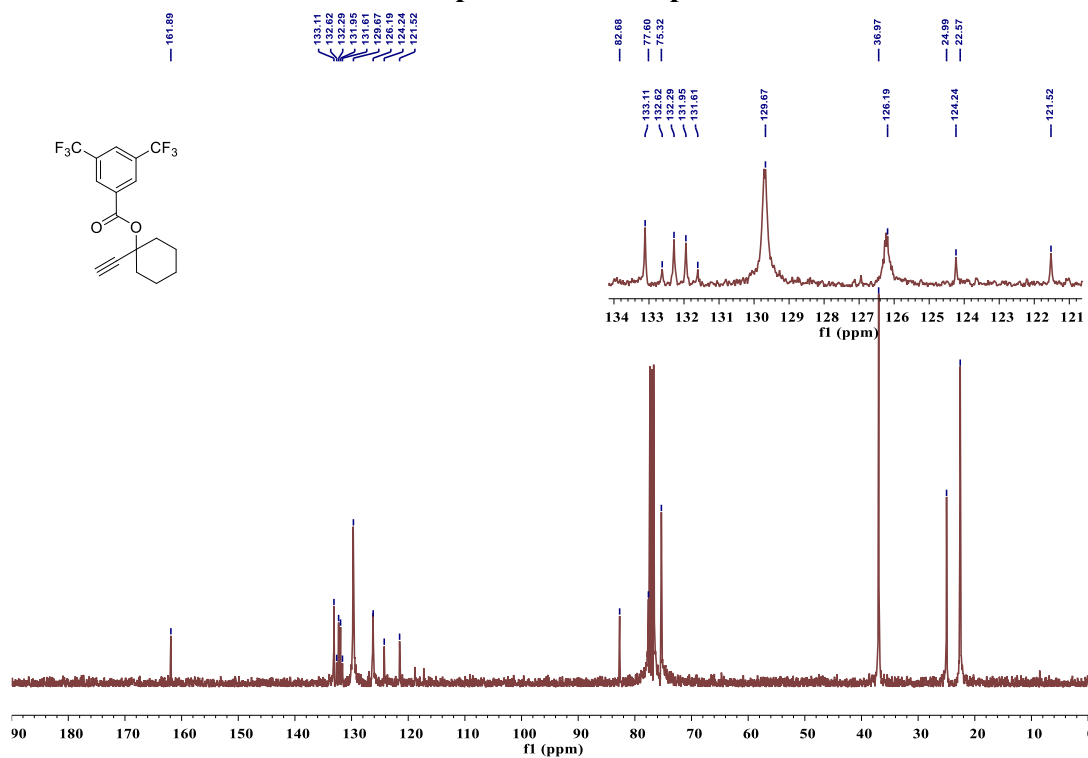

### <sup>19</sup>F NMR spectrum of compound 1r

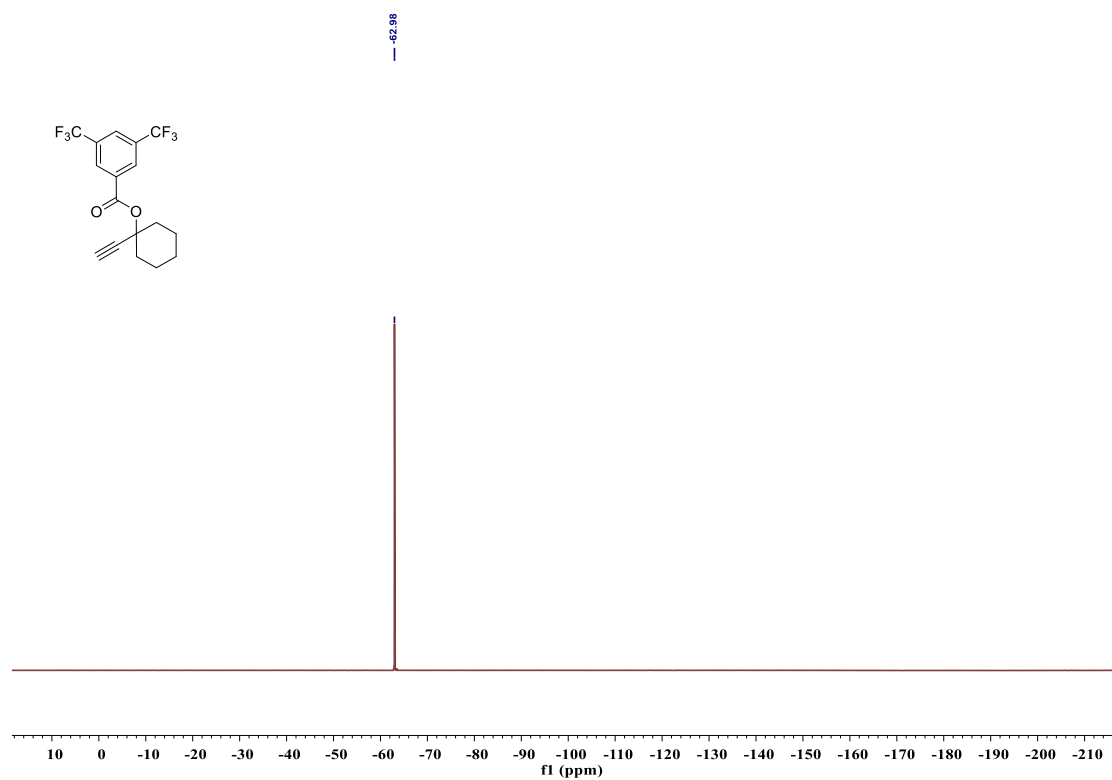

### <sup>1</sup>H NMR spectrum of compound 1s

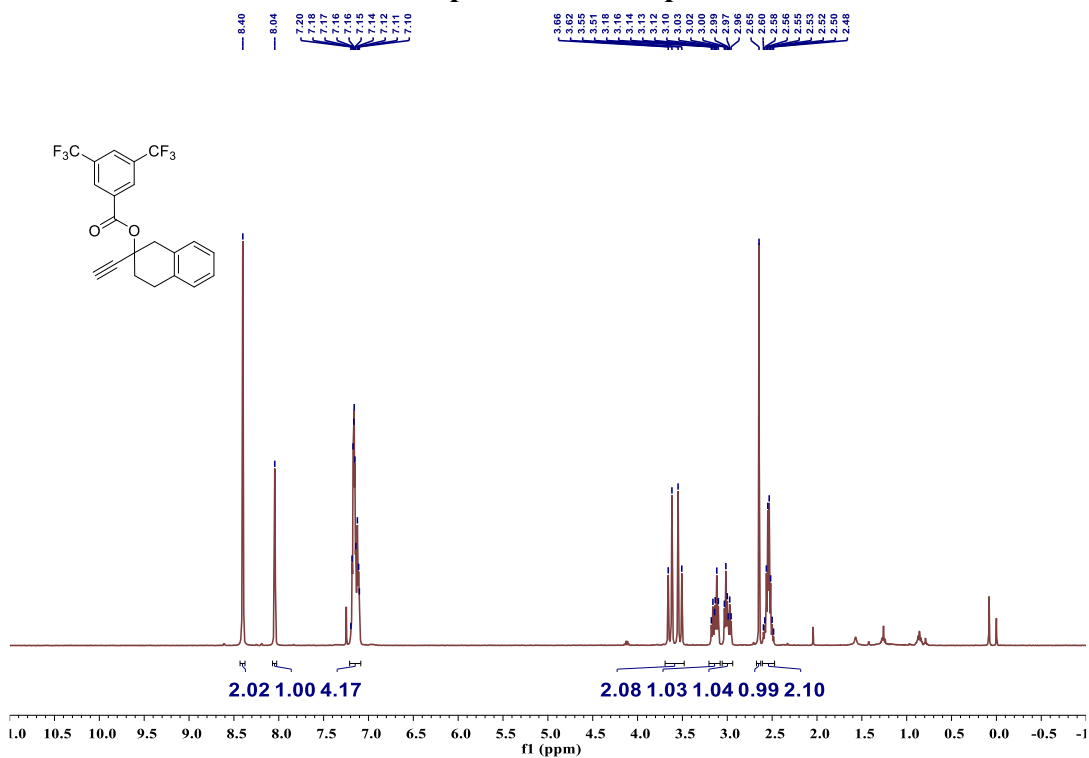

### <sup>13</sup>C NMR spectrum of compound 1s

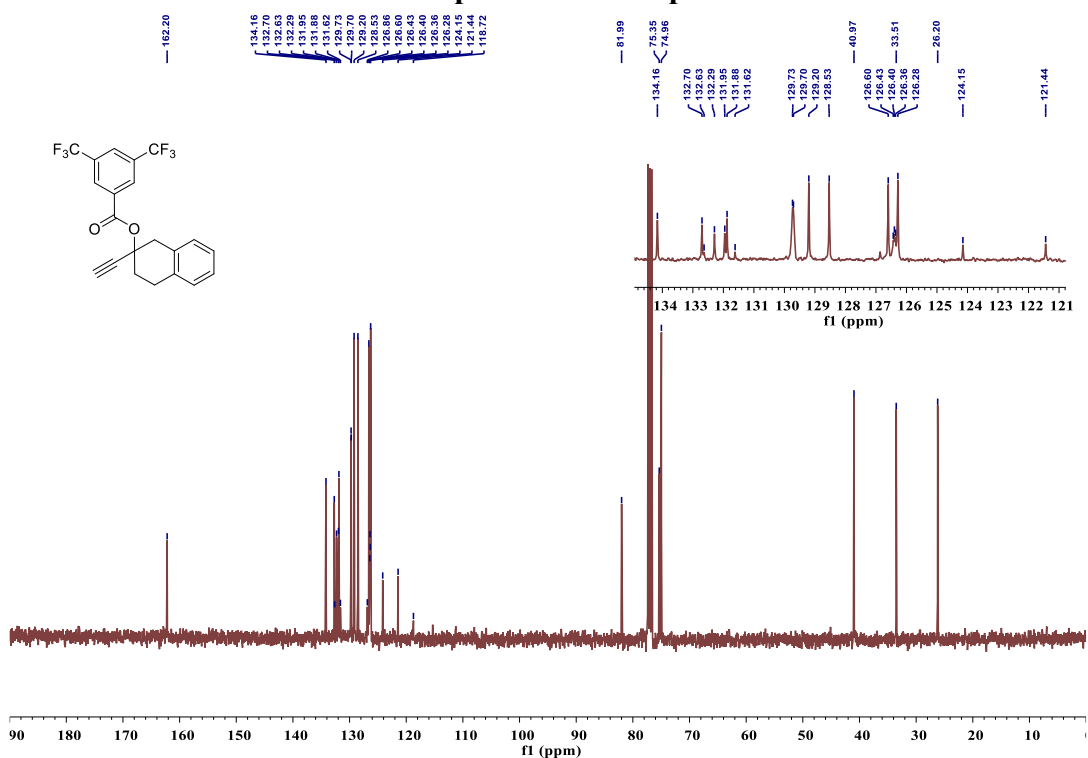

### <sup>19</sup>F NMR spectrum of compound 1s

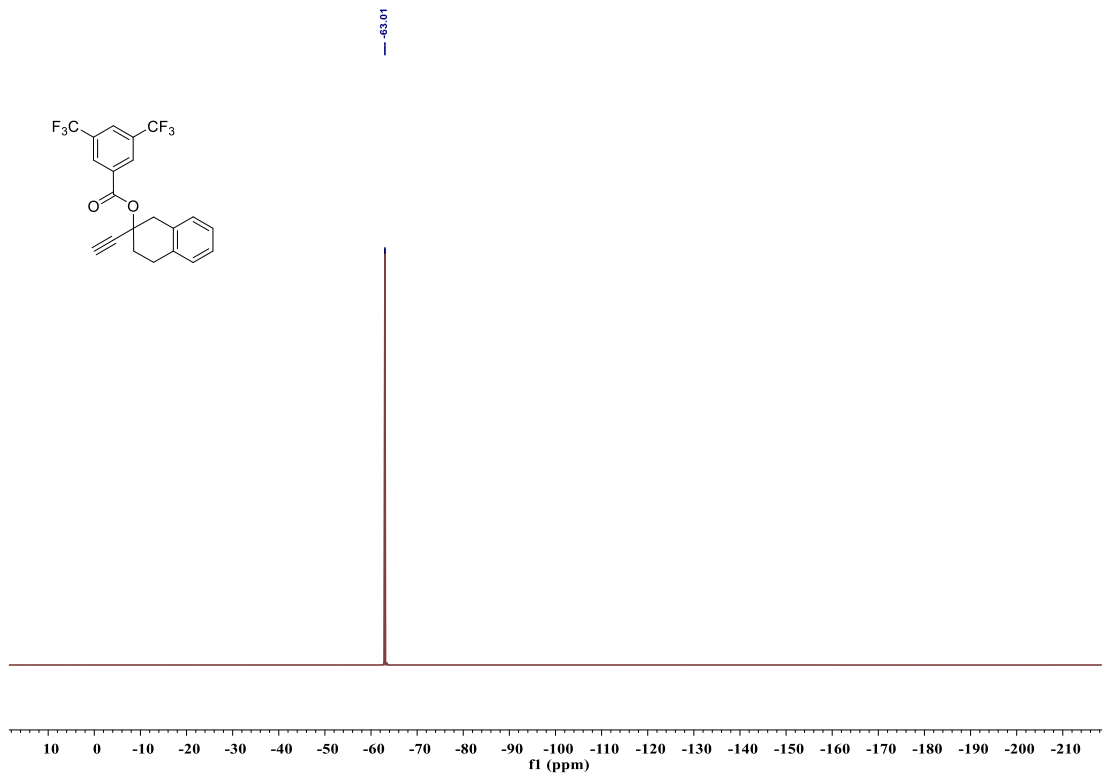

### <sup>1</sup>H NMR spectrum of compound 1t

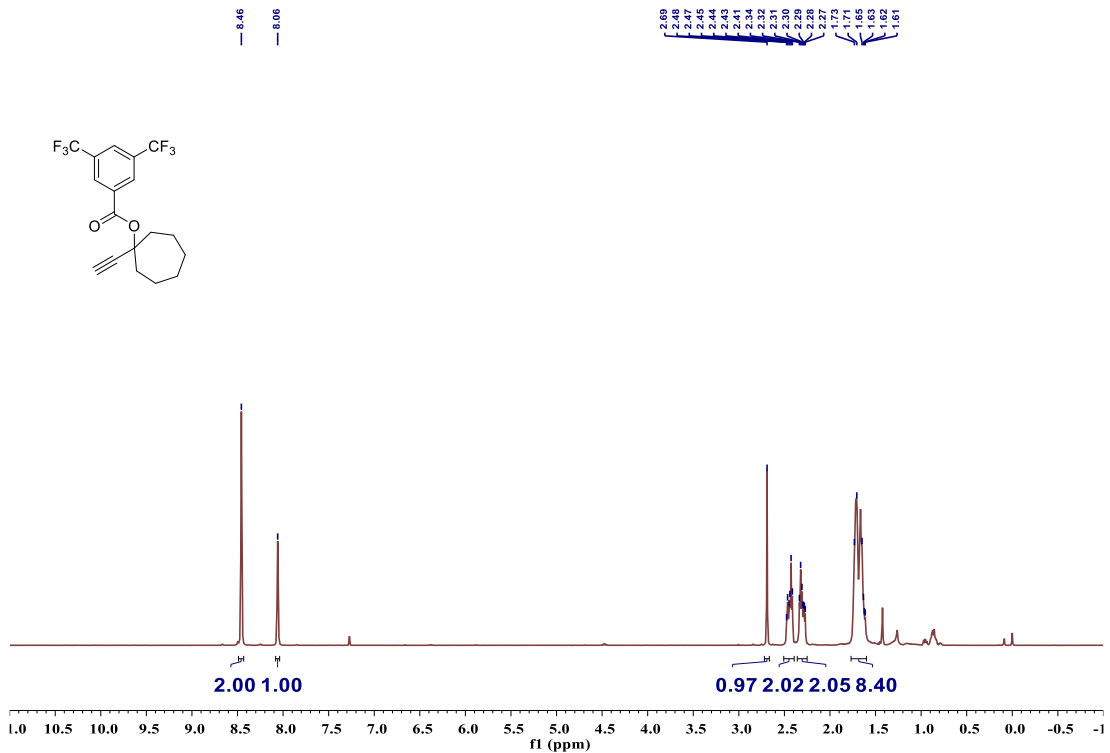



### <sup>13</sup>C NMR spectrum of compound 1t

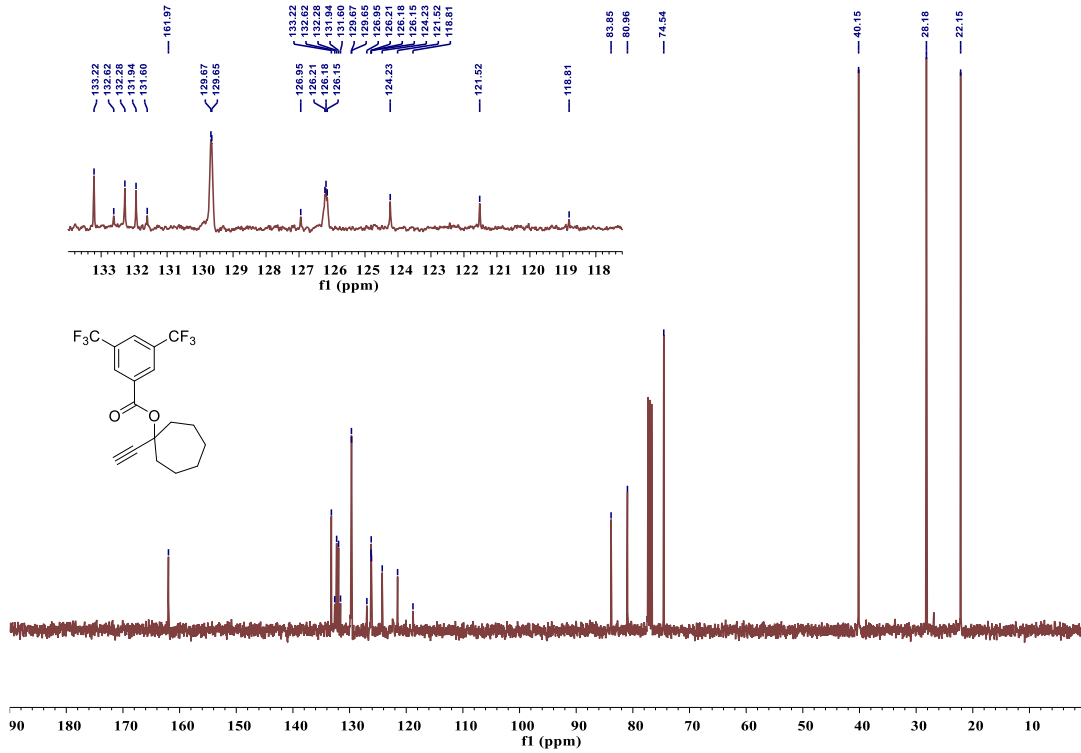

### <sup>19</sup>F NMR spectrum of compound 1t

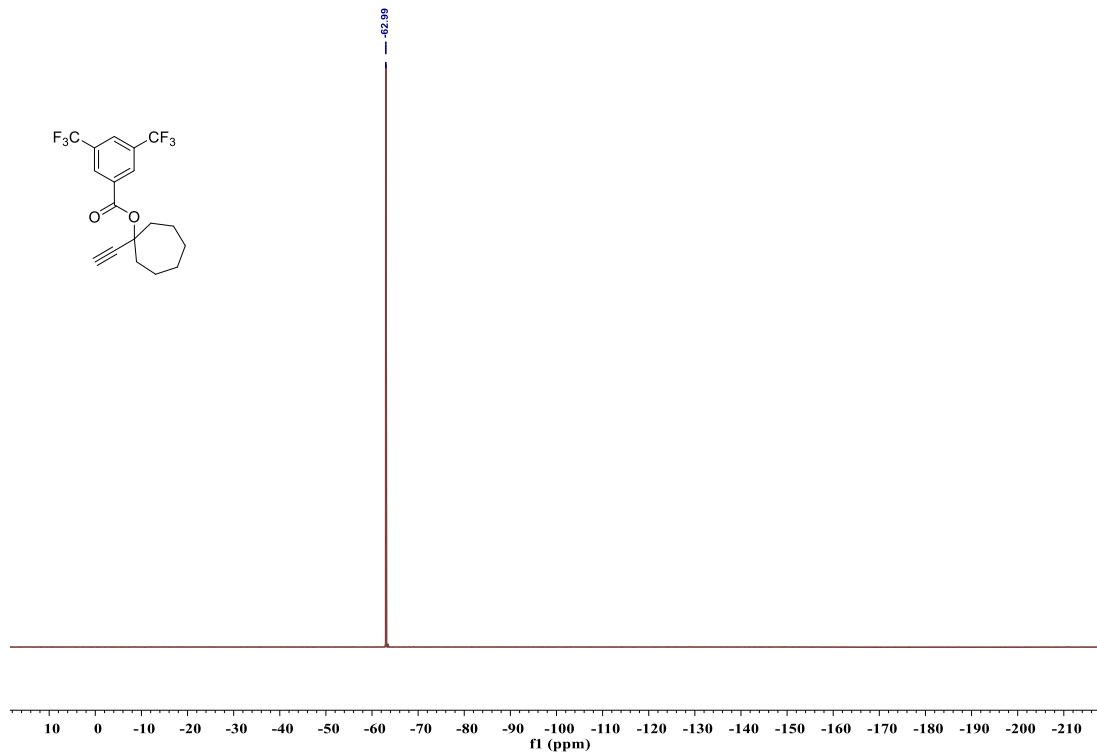





### <sup>13</sup>C NMR spectrum of compound 1v

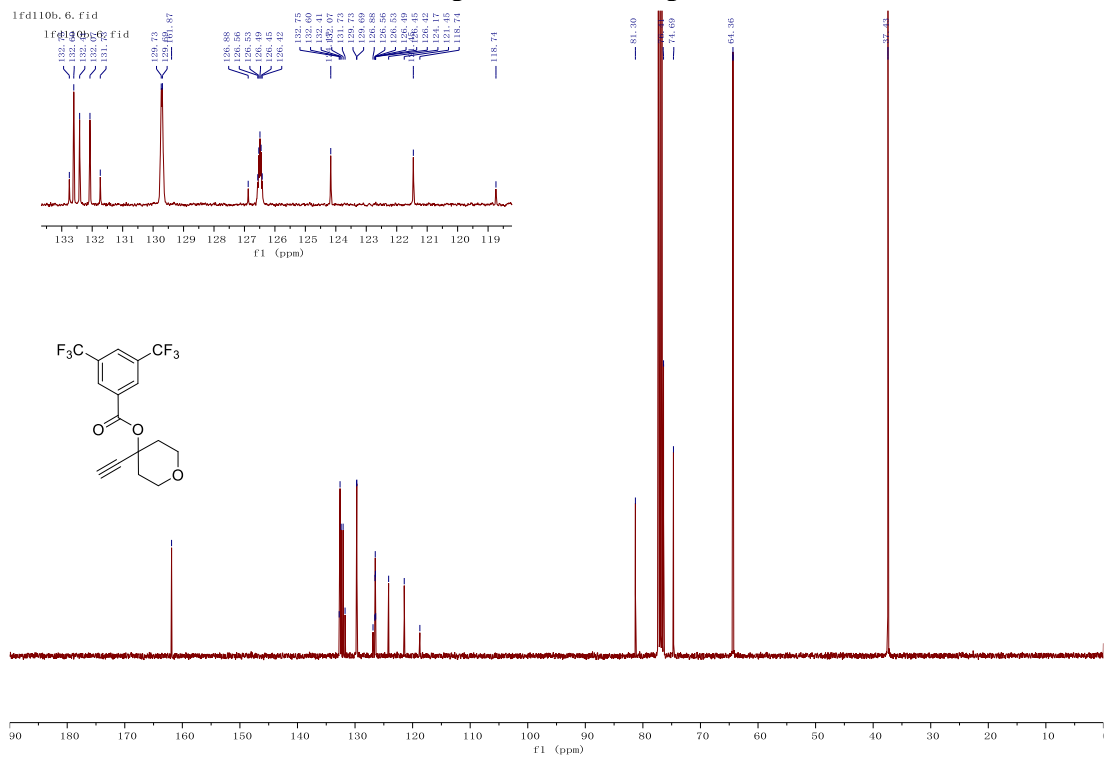

### <sup>19</sup>F NMR spectrum of compound 1v

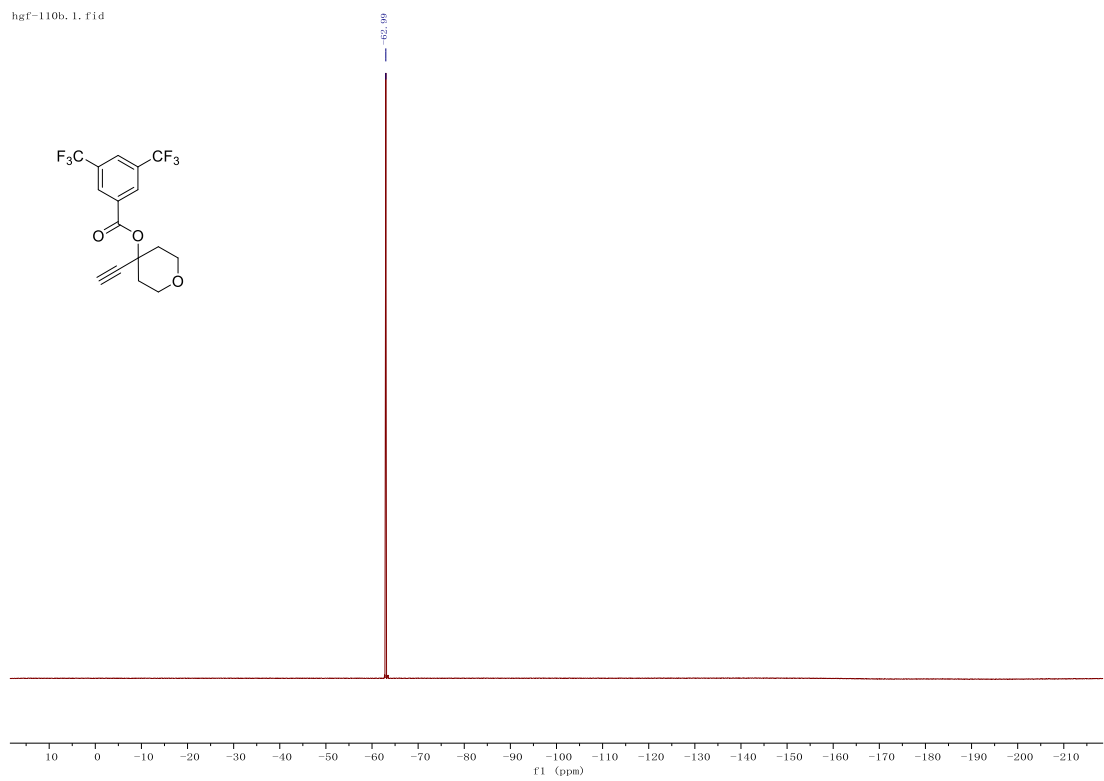

### <sup>1</sup>H NMR spectrum of compound 1w

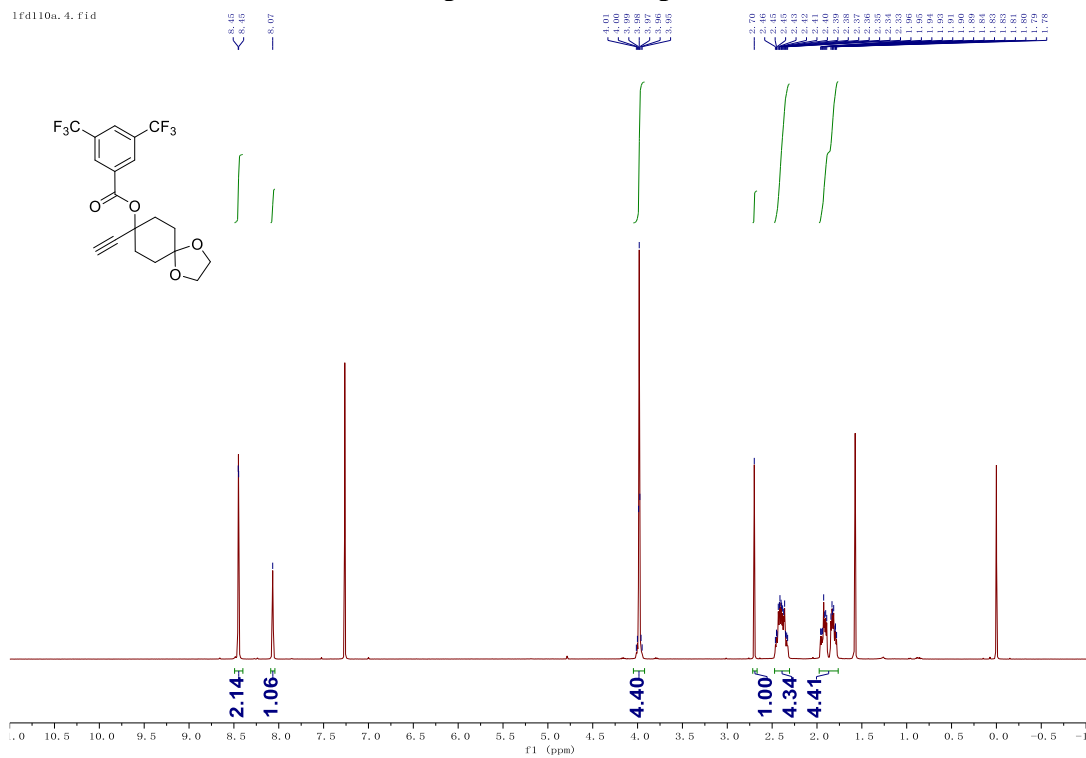

### <sup>13</sup>C NMR spectrum of compound 1w

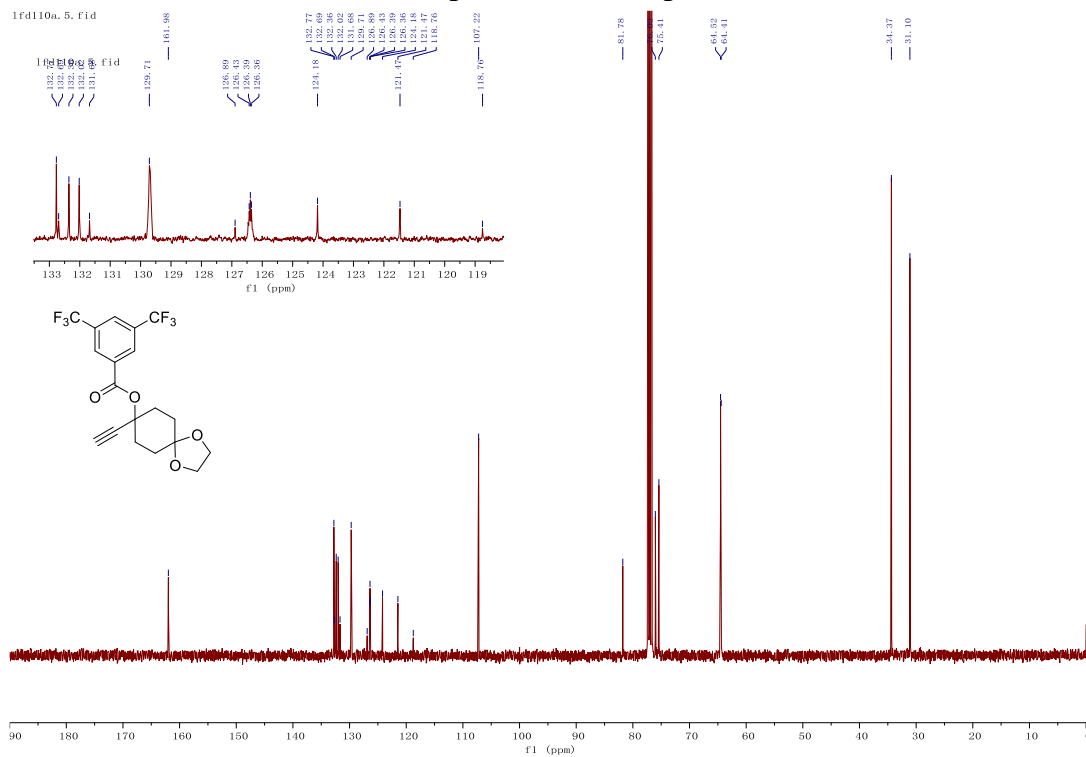

# <sup>19</sup>F NMR spectrum of compound 1w

hgf-110a. 1. F1d

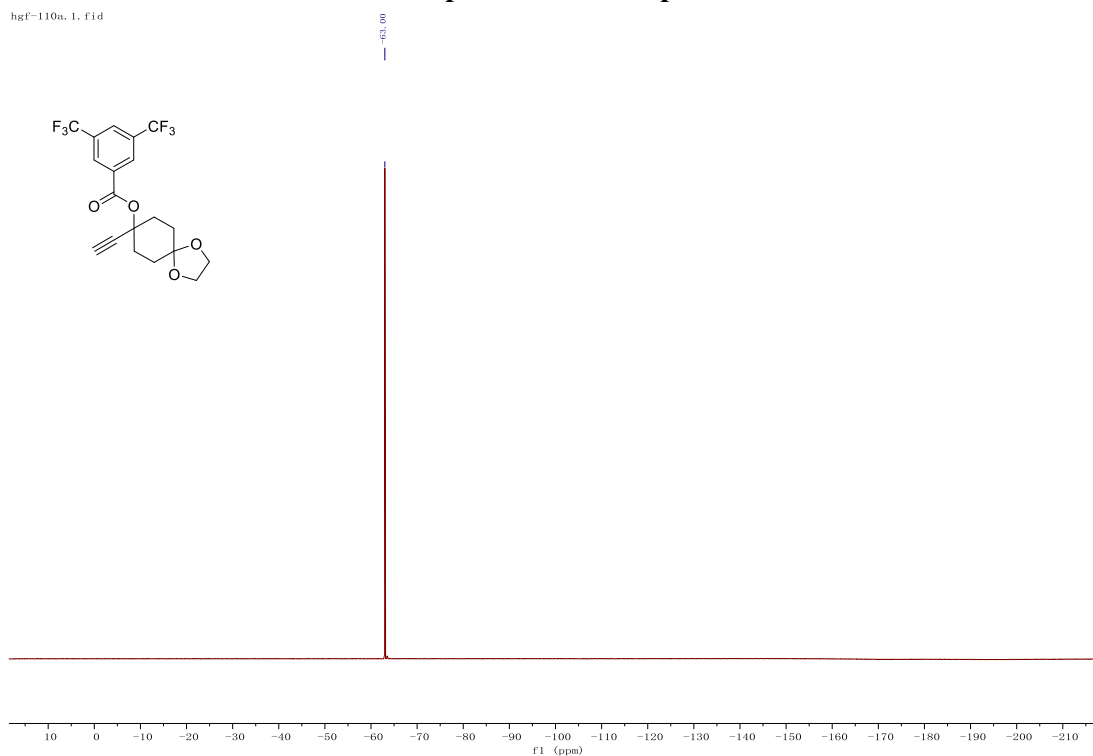

# <sup>1</sup>H NMR spectrum of compound 1x

1fd642b/1

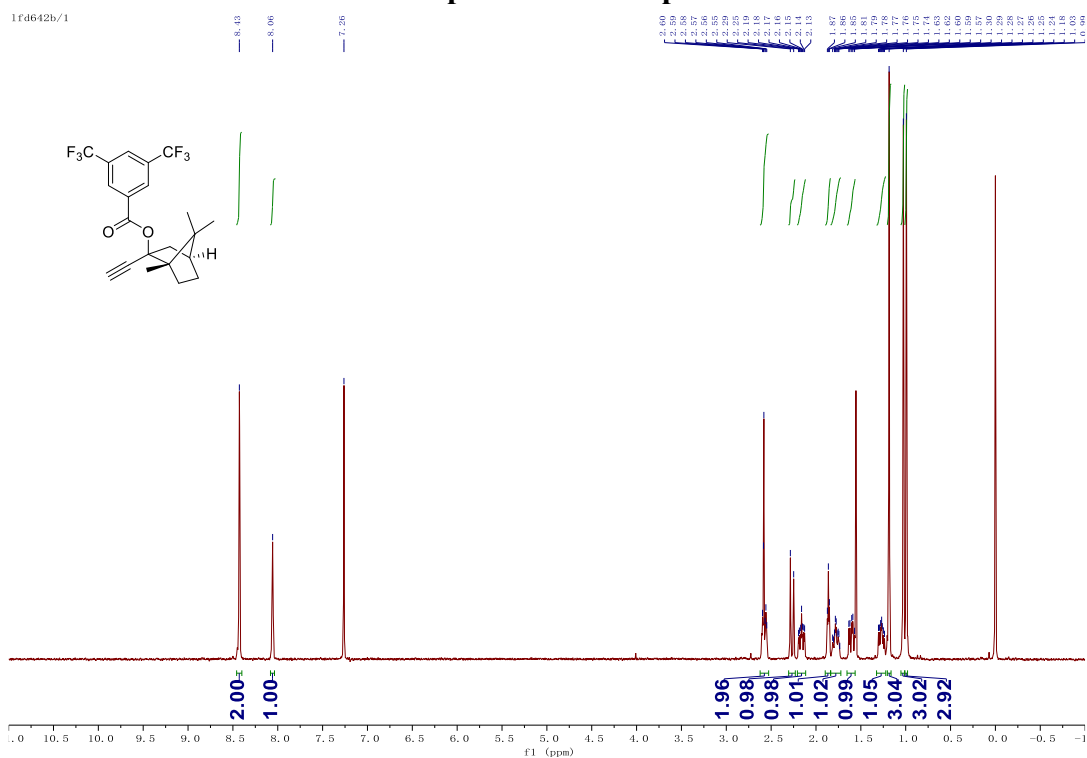

### <sup>13</sup>C NMR spectrum of compound 1x

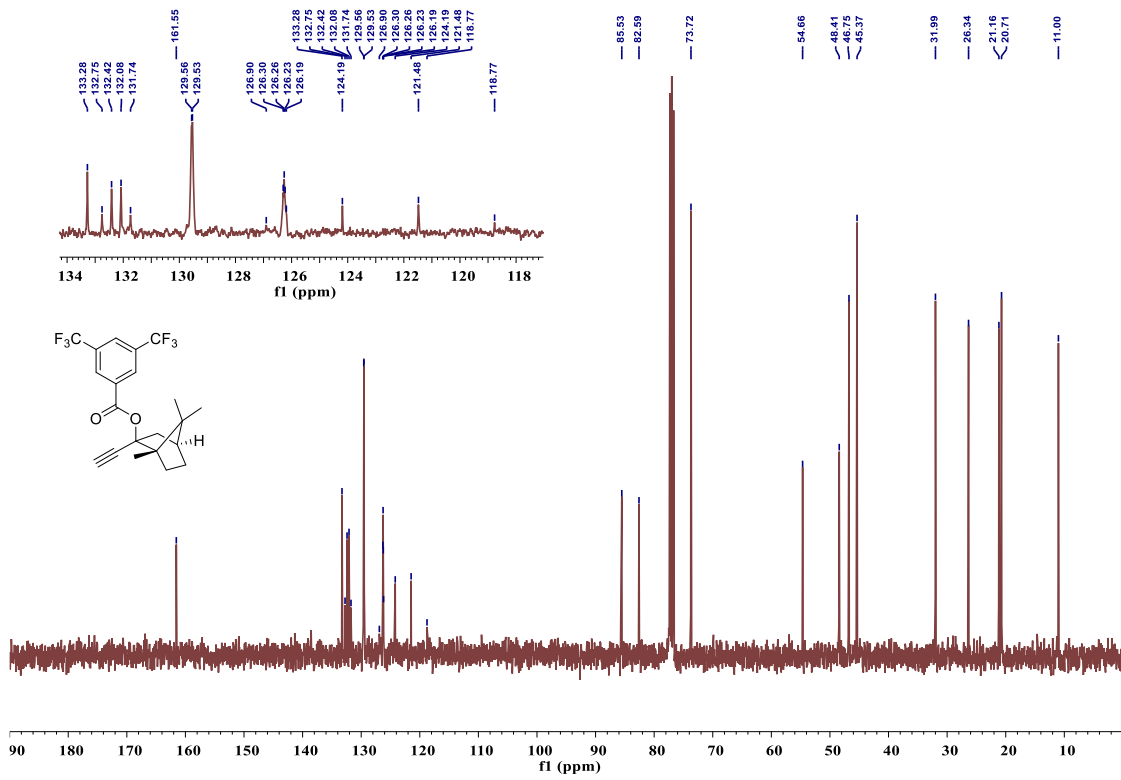

### <sup>19</sup>F NMR spectrum of compound 1x

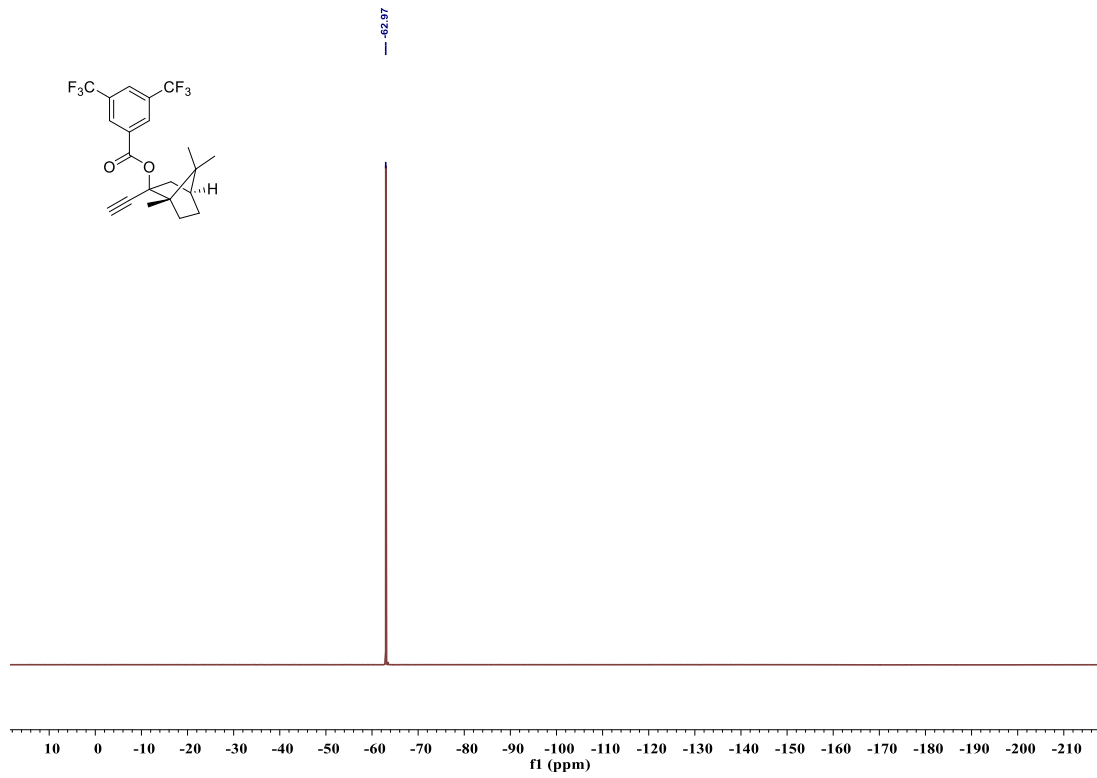

### <sup>1</sup>H NMR spectrum of compound 3a

1fd667a/1

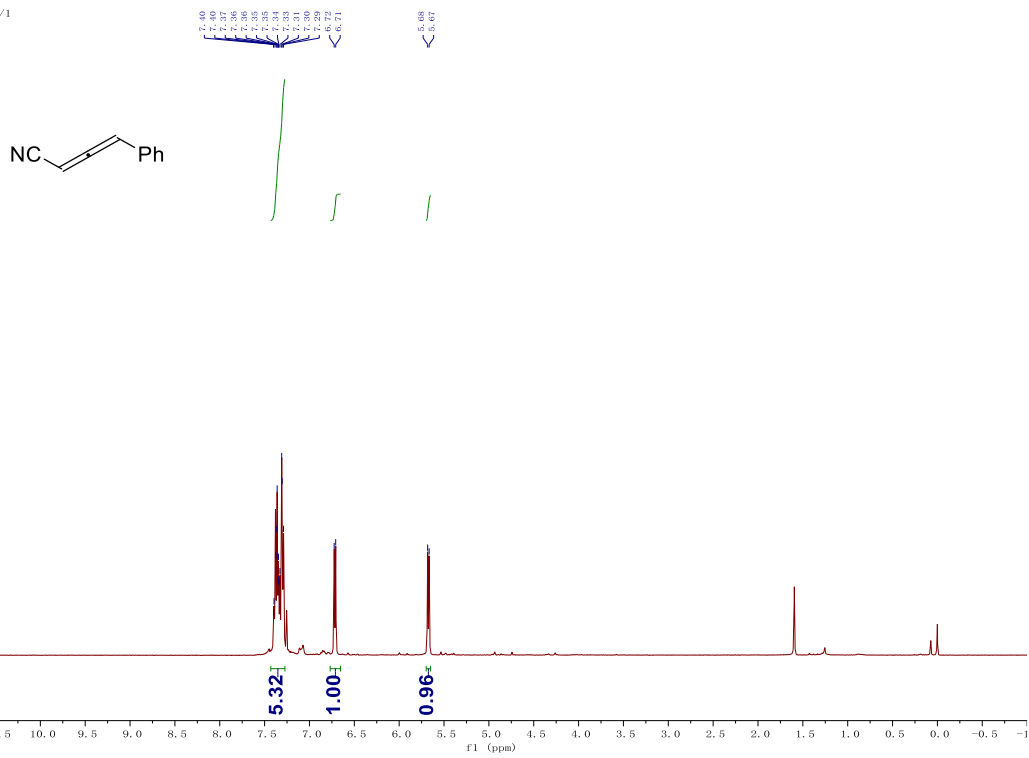

### <sup>13</sup>C NMR spectrum of compound 3a

1fd667a1-c13-1f1

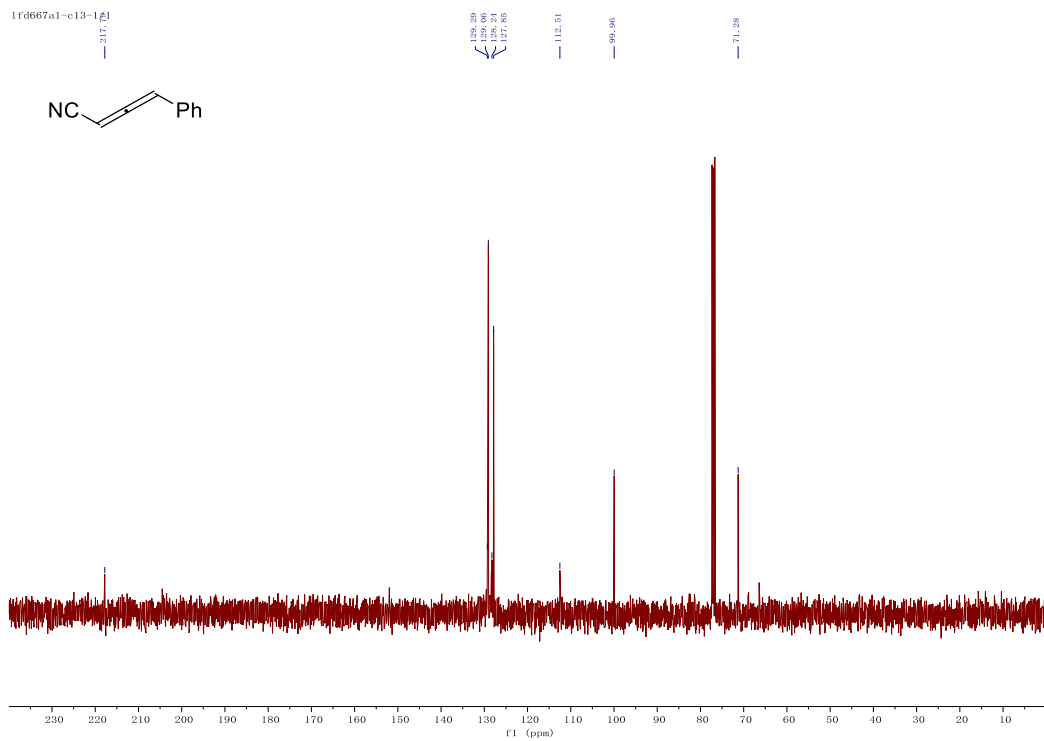



### <sup>1</sup>H NMR spectrum of compound 3b

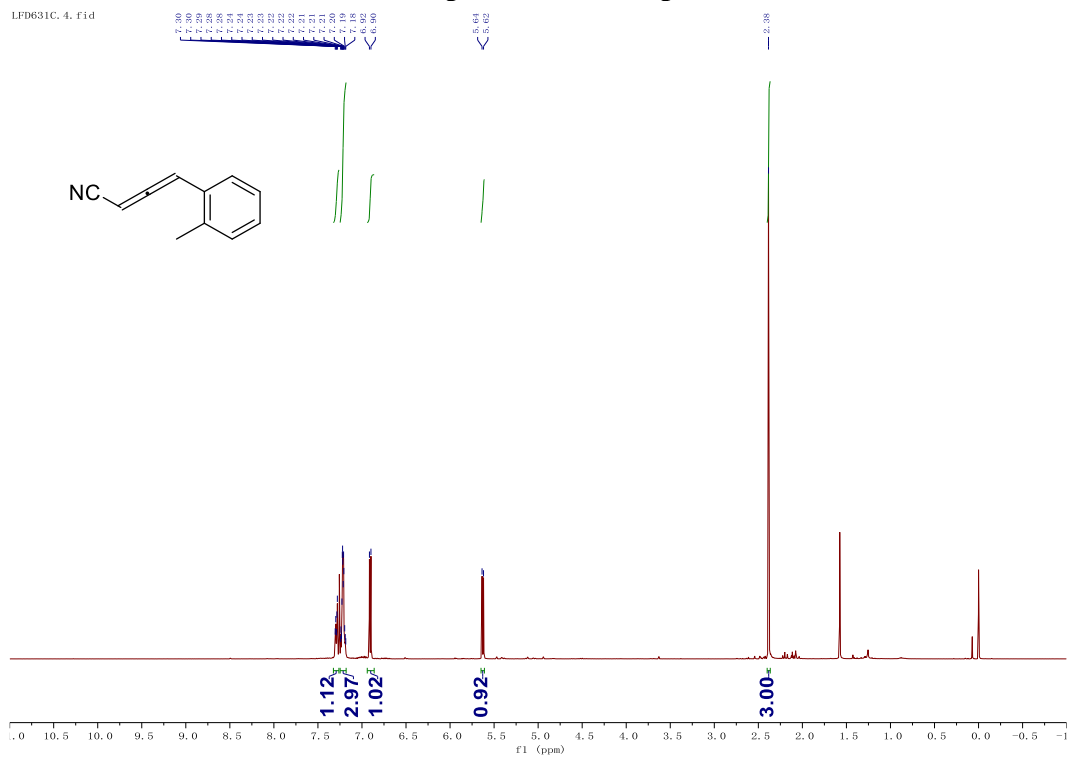

### <sup>13</sup>C NMR spectrum of compound 3b

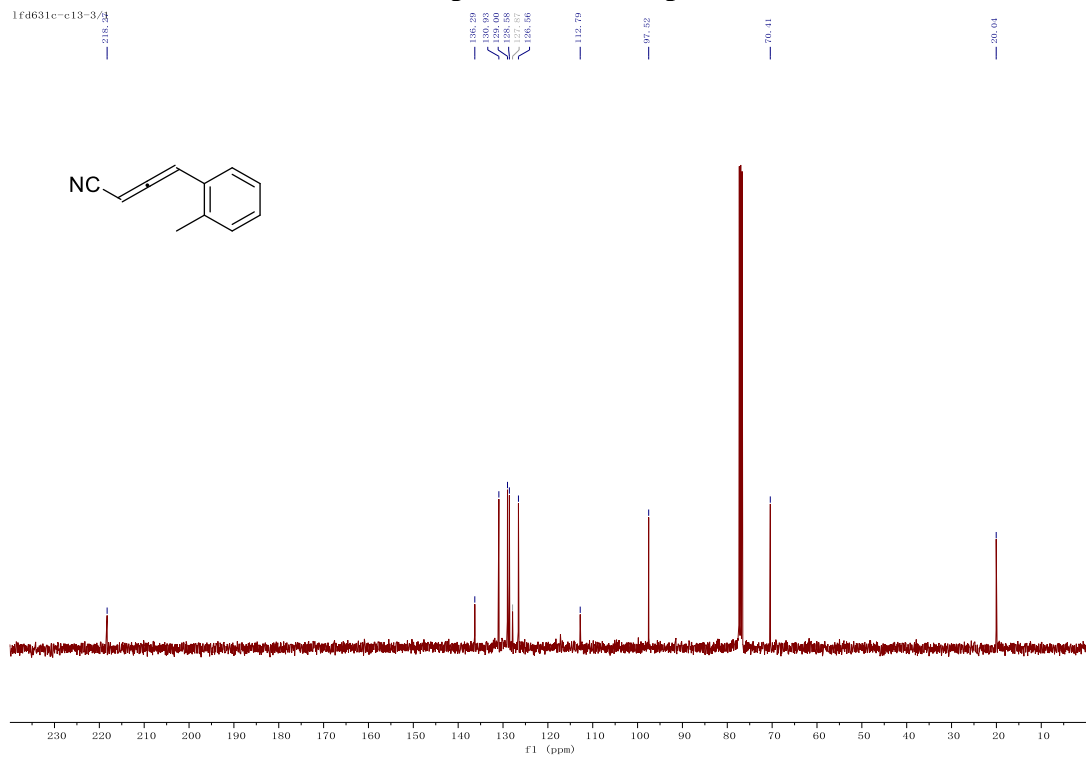

### <sup>1</sup>H NMR spectrum of compound 3c

1fd606e-2/1

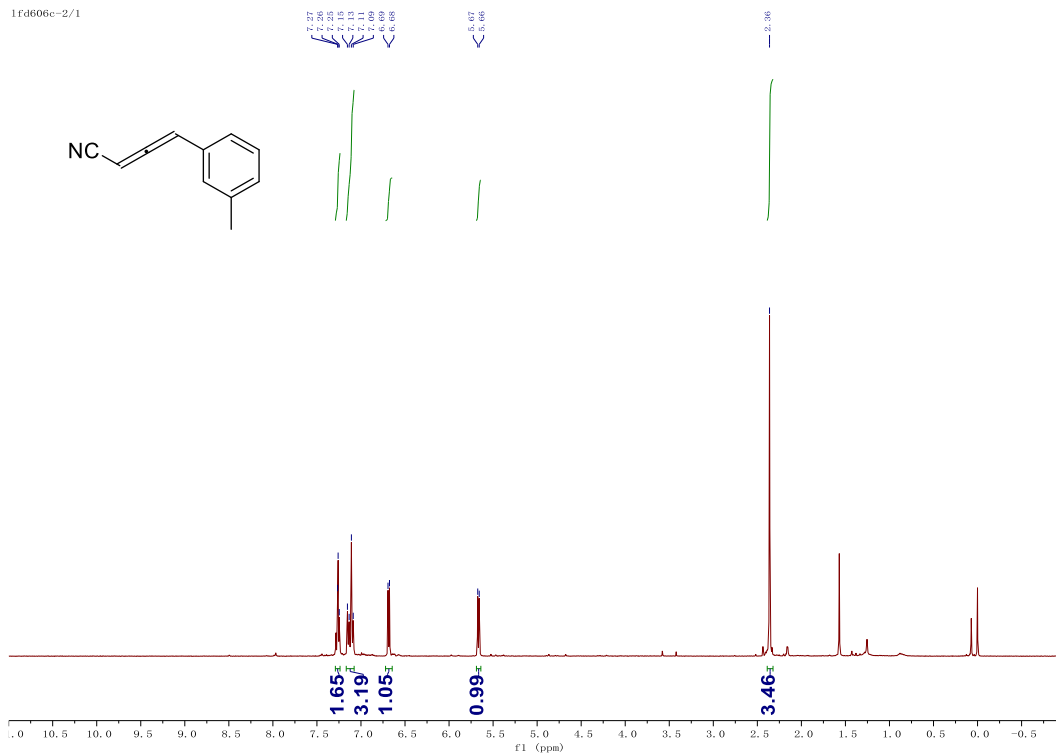

### <sup>13</sup>C NMR spectrum of compound 3c

1fd606e-c13-2/3

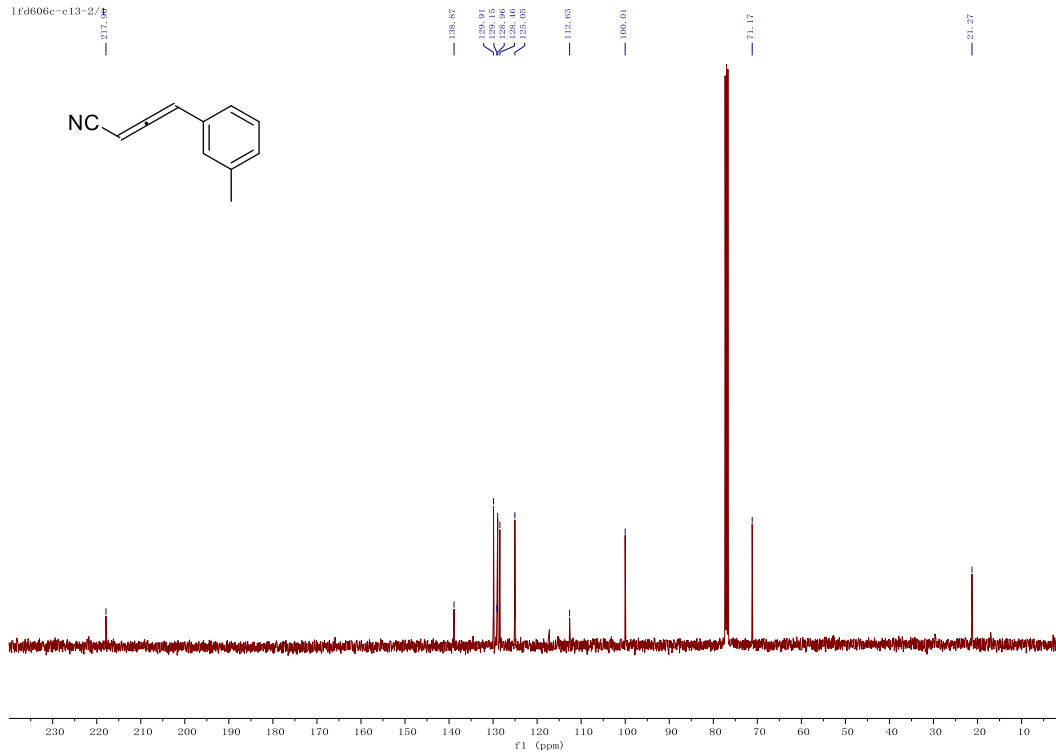

### <sup>1</sup>H NMR spectrum of compound 3d

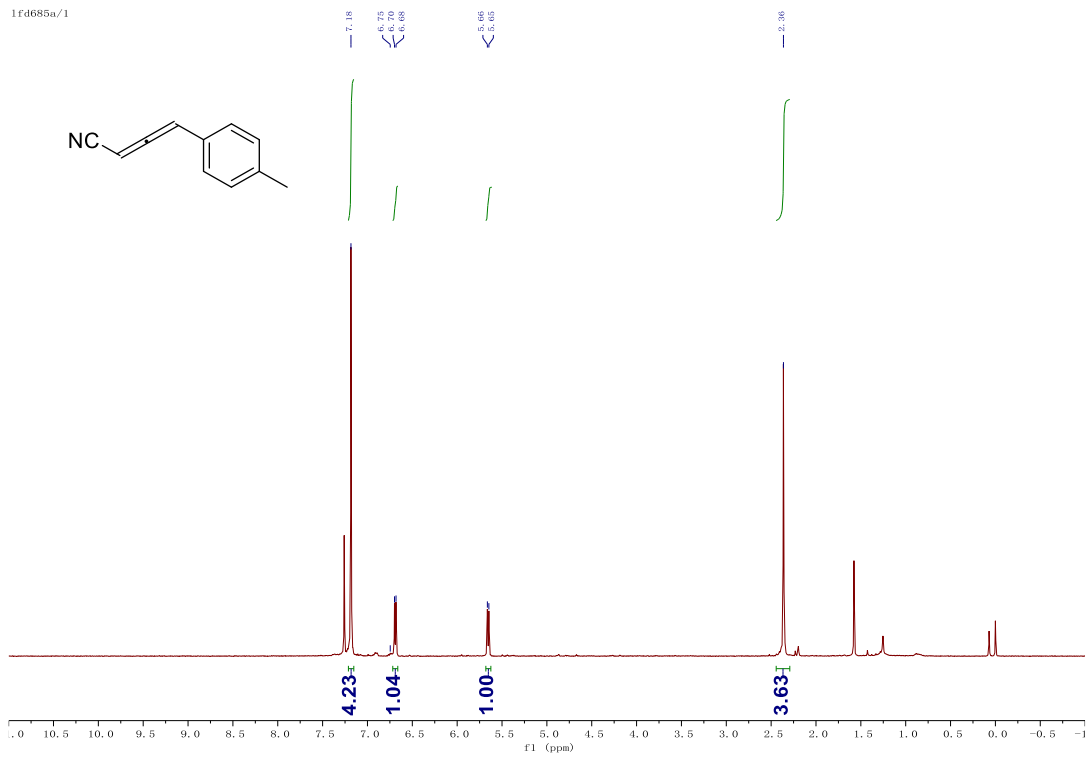

### <sup>13</sup>C NMR spectrum of compound 3d

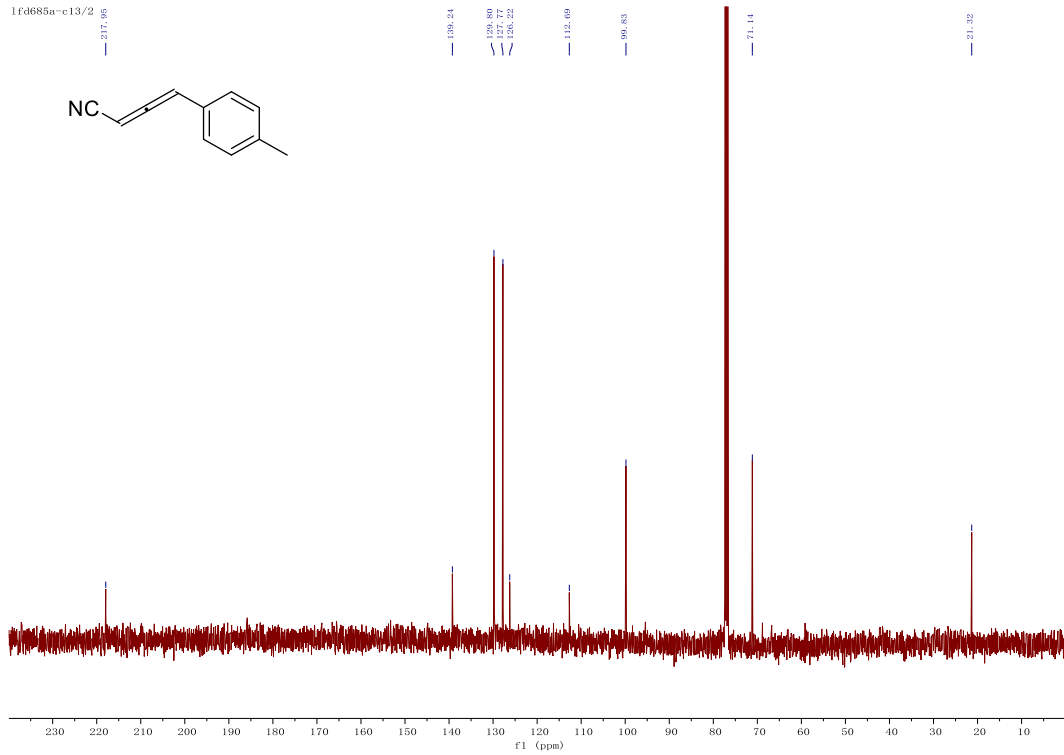

### <sup>1</sup>H NMR spectrum of compound 3e

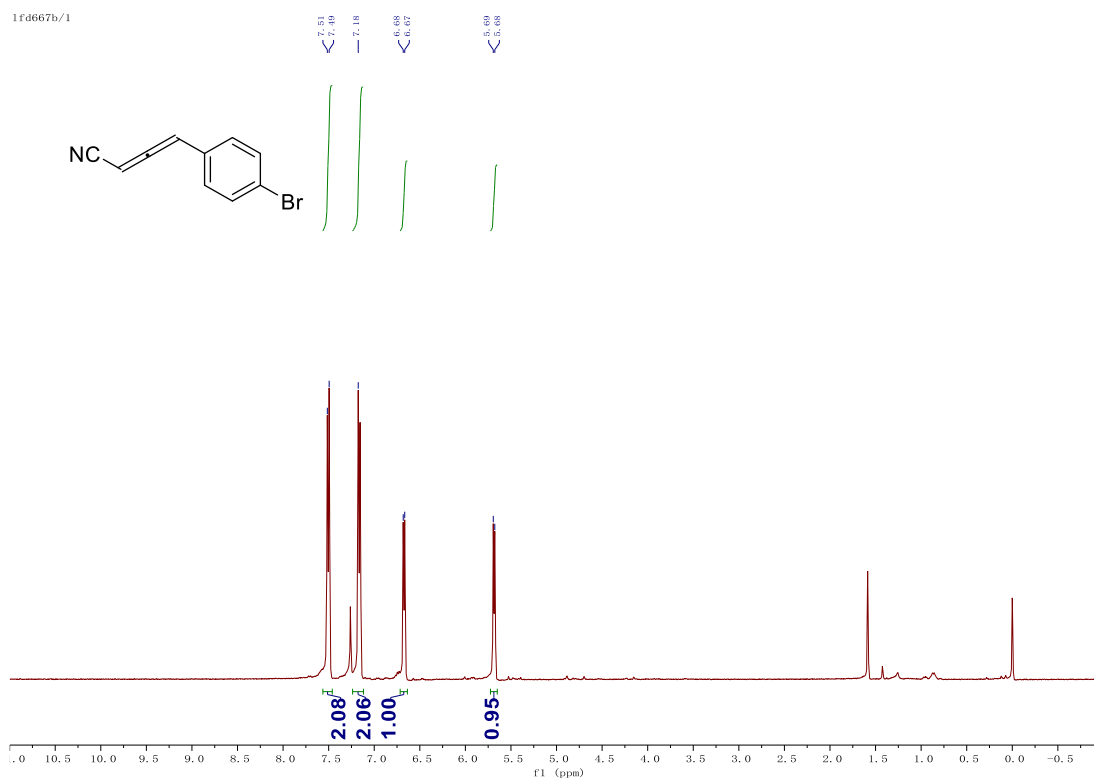

### <sup>13</sup>C NMR spectrum of compound 3e

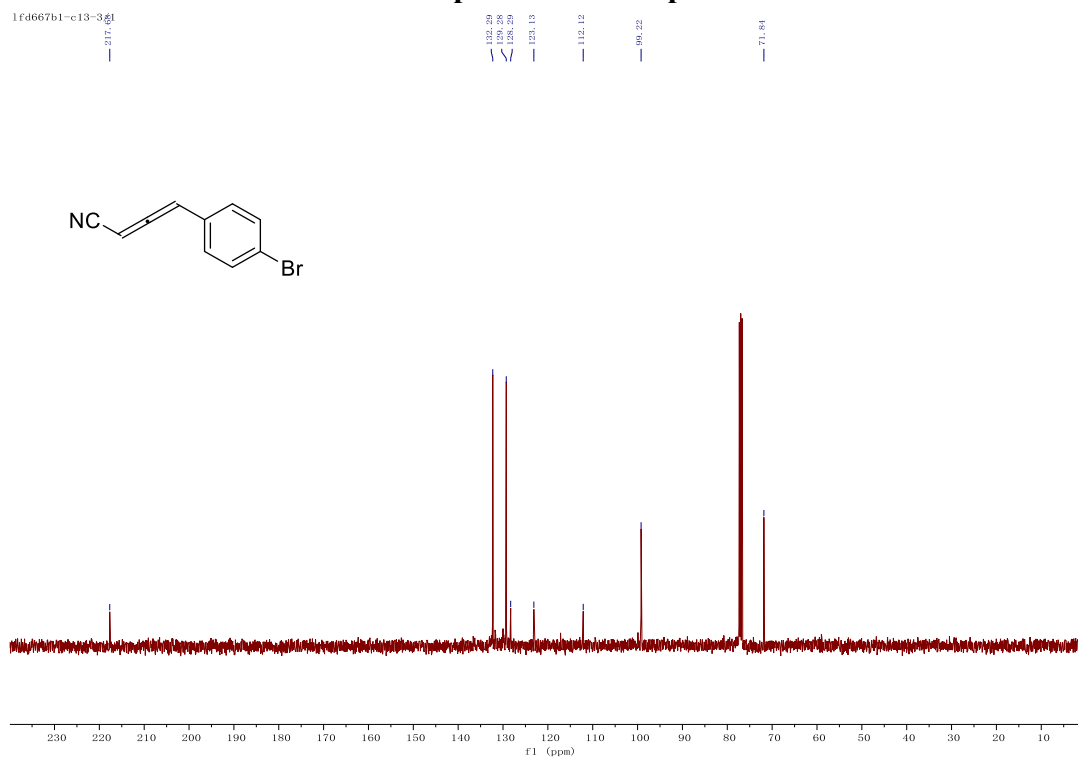

# <sup>1</sup>H NMR spectrum of compound 3f

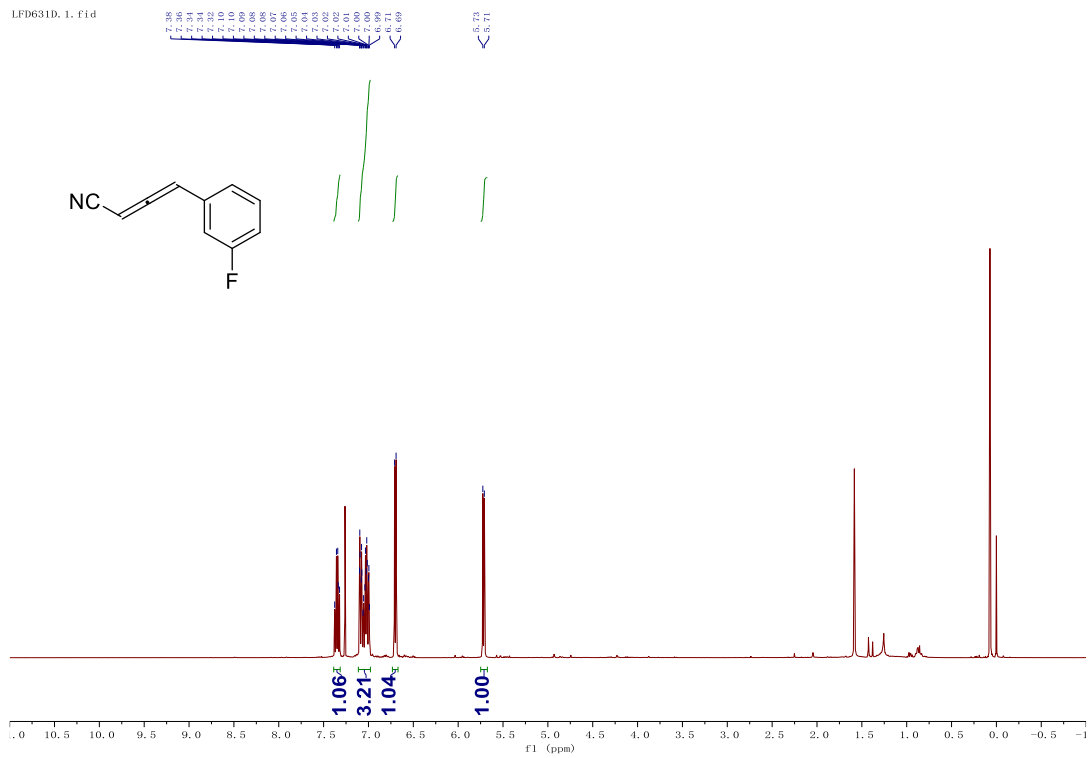

# <sup>13</sup>C NMR spectrum of compound 3f

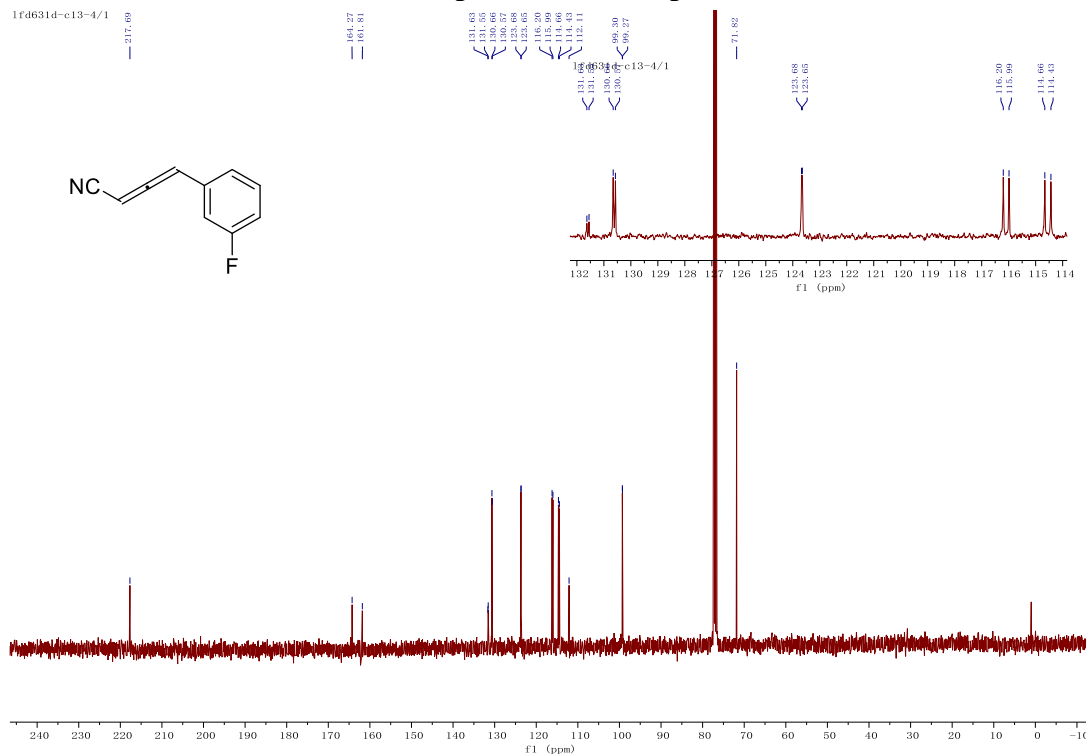

### <sup>19</sup>F NMR spectrum of compound 3f

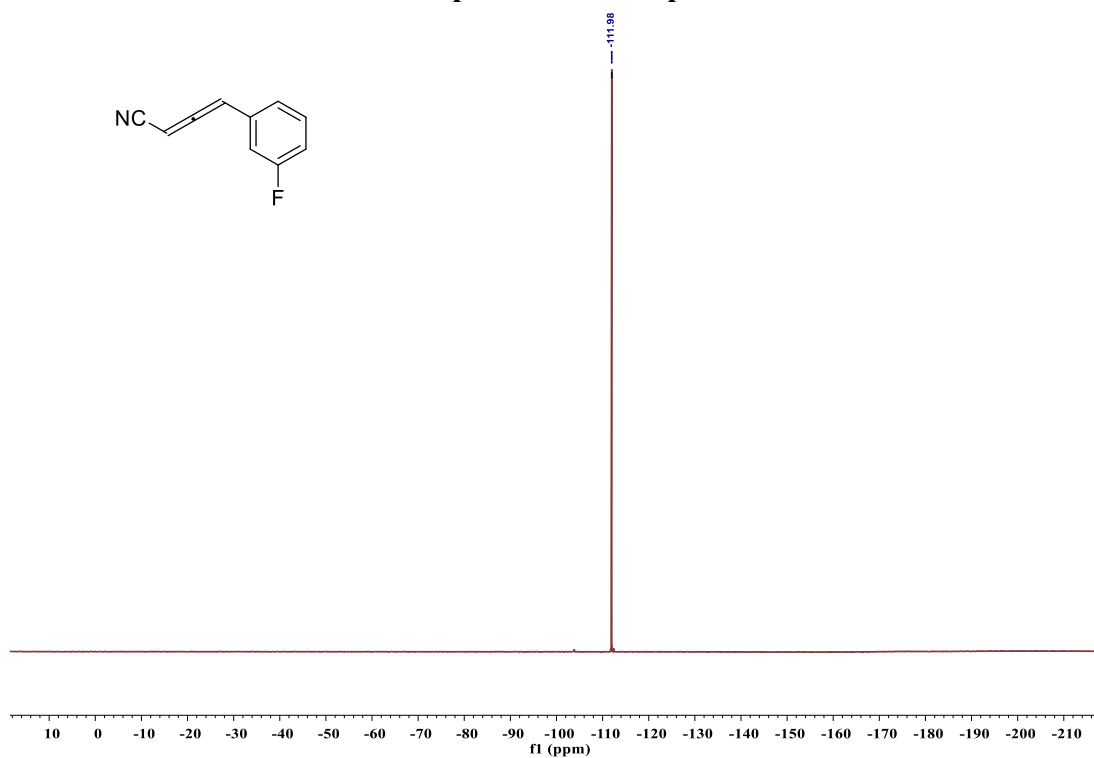

### <sup>1</sup>H NMR spectrum of compound 3g

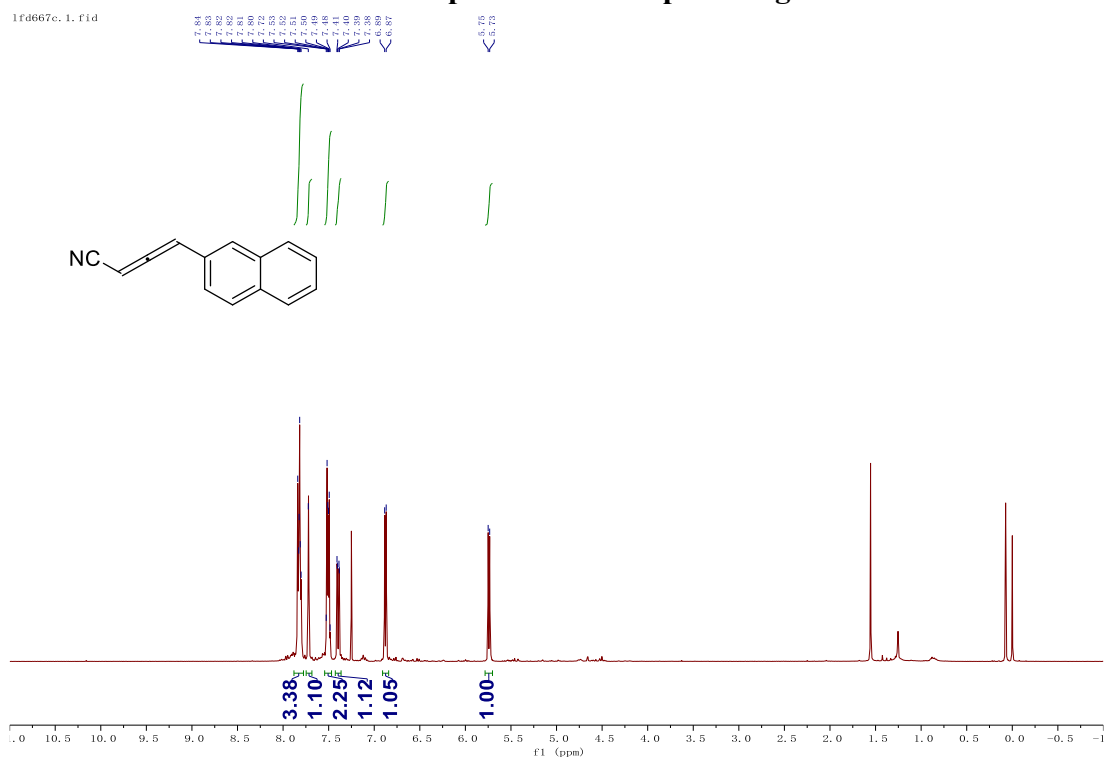

### <sup>13</sup>C NMR spectrum of compound 3g

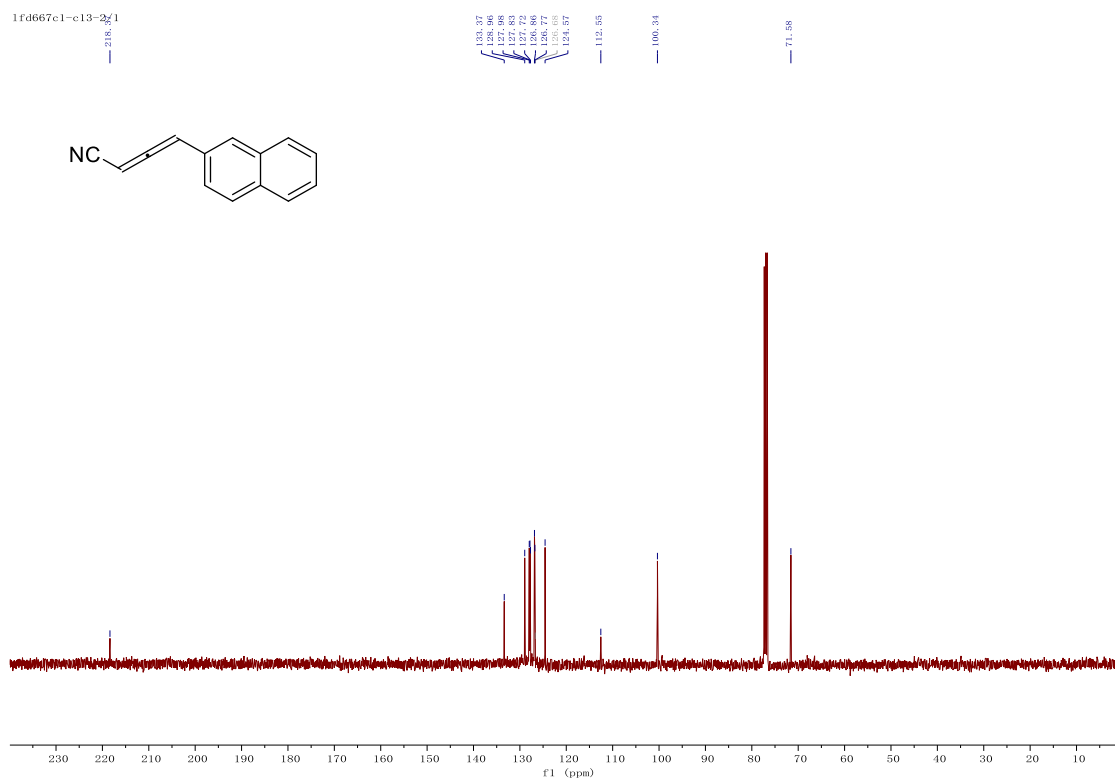

### <sup>1</sup>H NMR spectrum of compound 3h

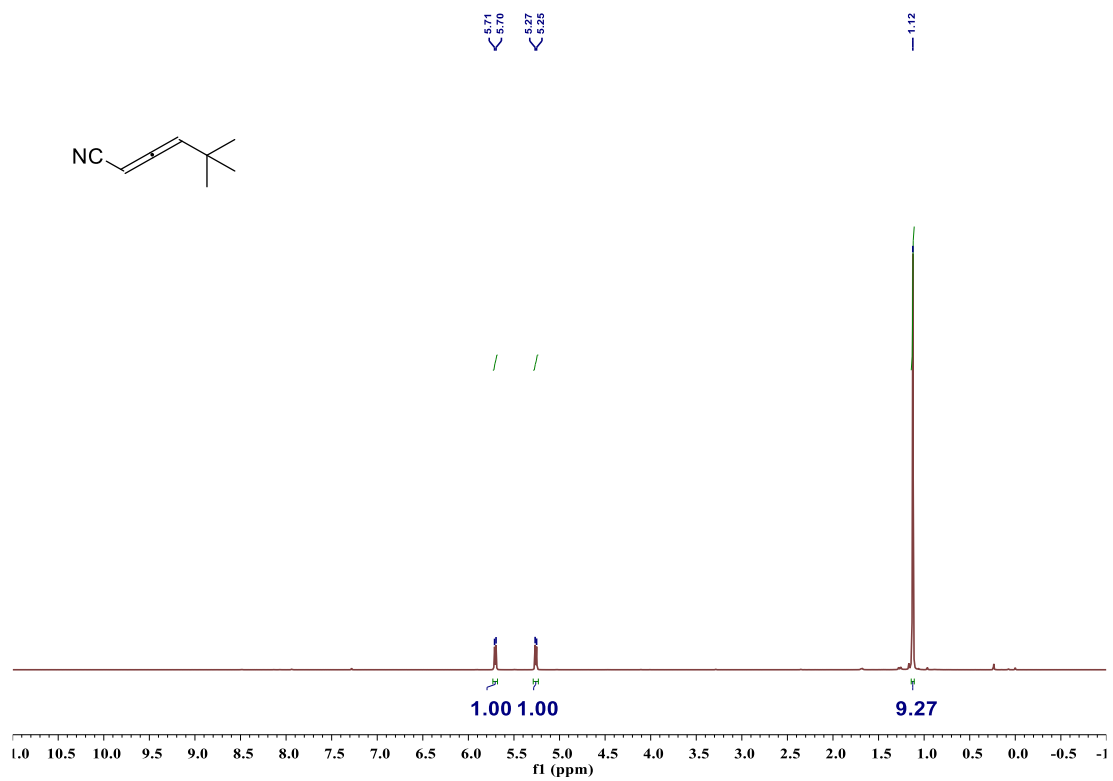

### <sup>13</sup>C NMR spectrum of compound 3h

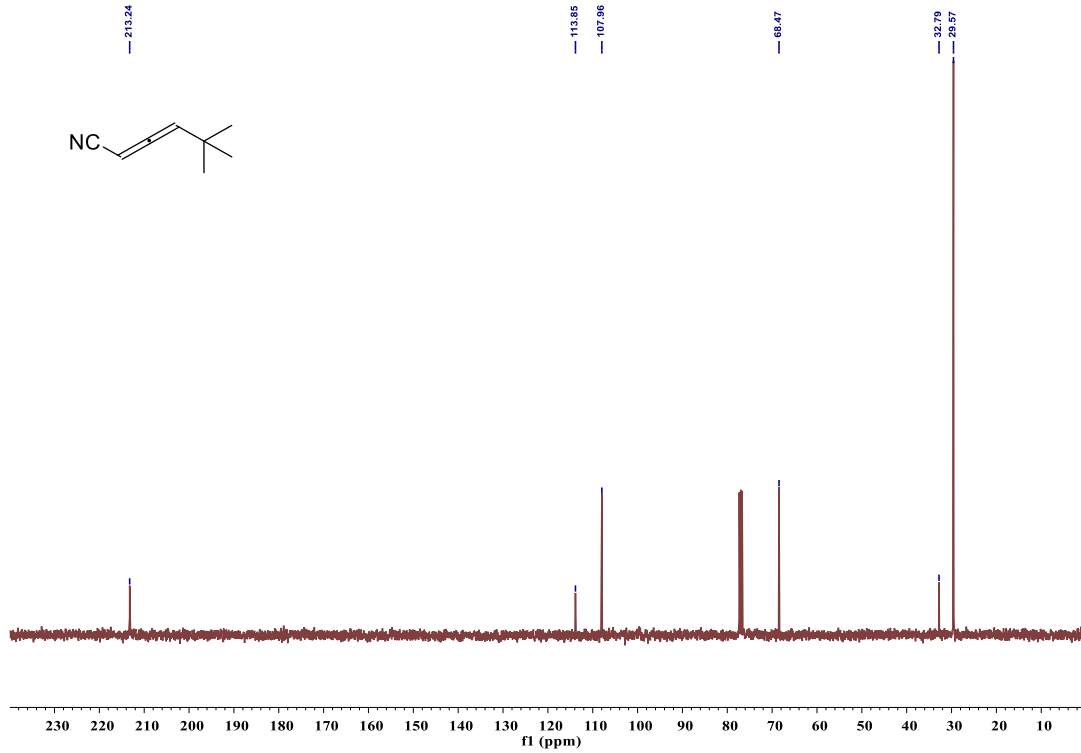

### <sup>1</sup>H NMR spectrum of compound 3i

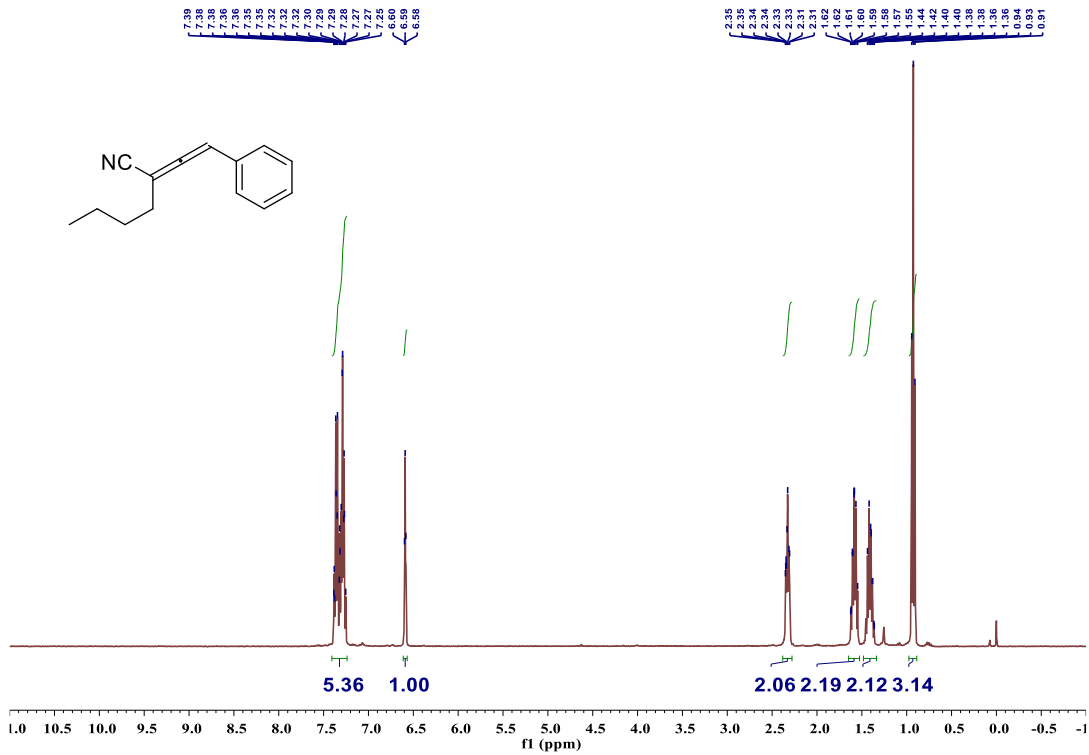



### <sup>13</sup>C NMR spectrum of compound 3i

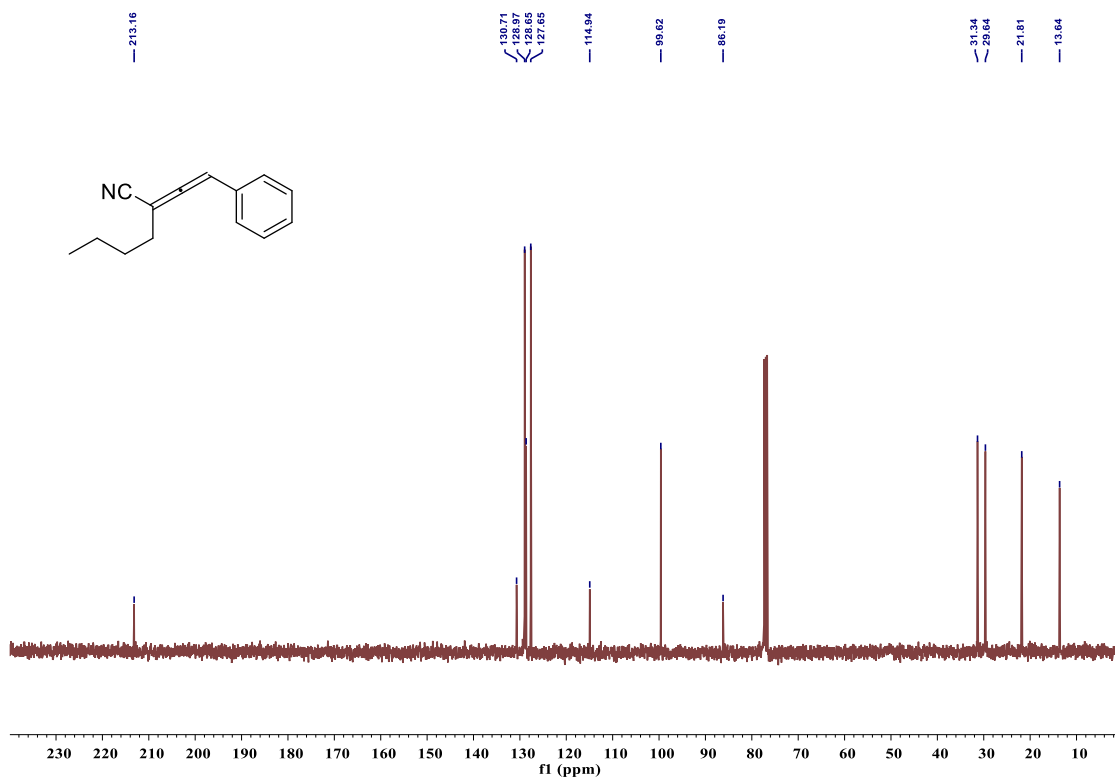

### <sup>1</sup>H NMR spectrum of compound 3j

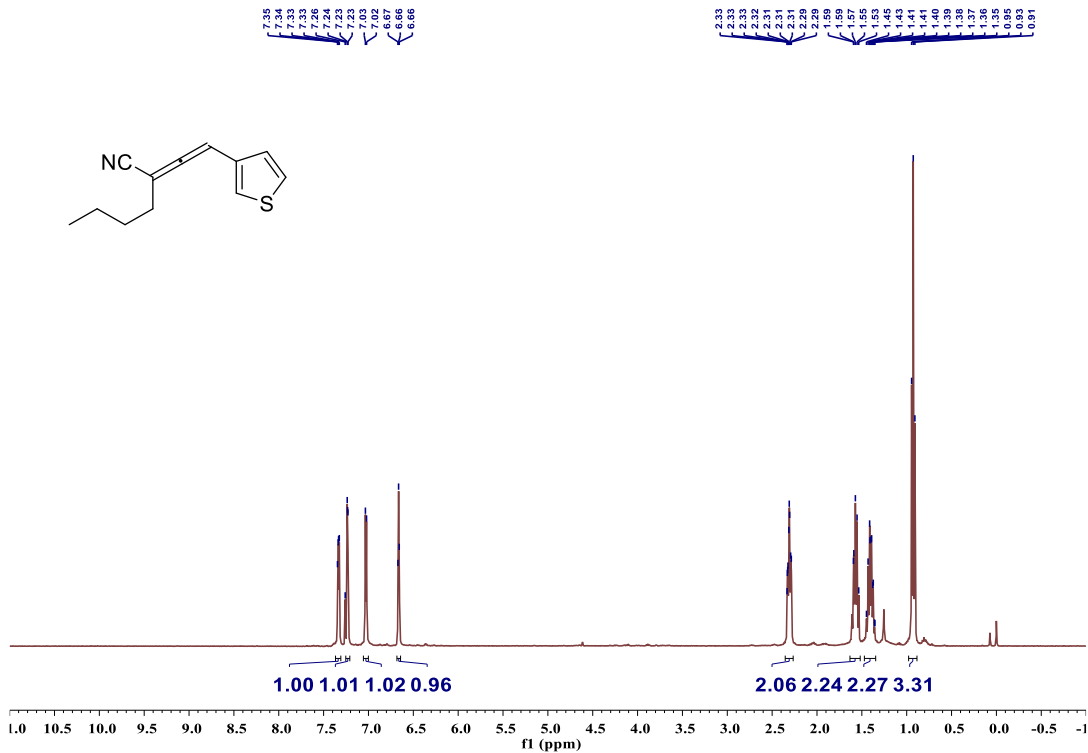

### <sup>13</sup>C NMR spectrum of compound 3j

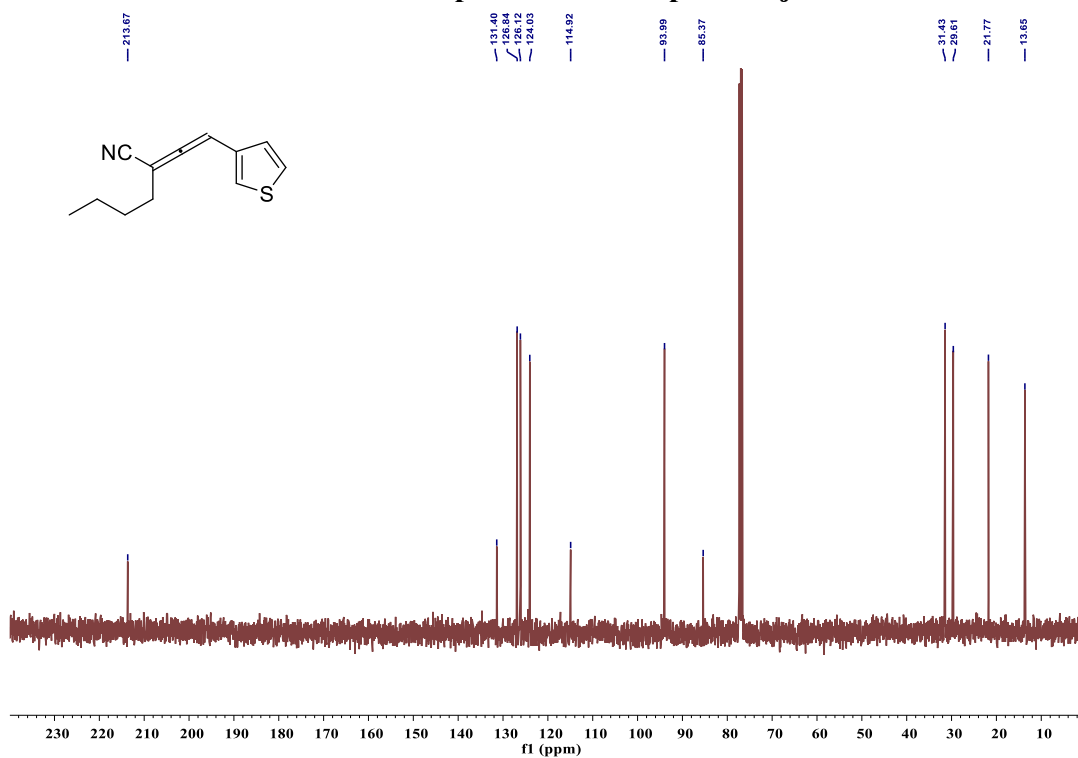

### <sup>1</sup>H NMR spectrum of compound 3k

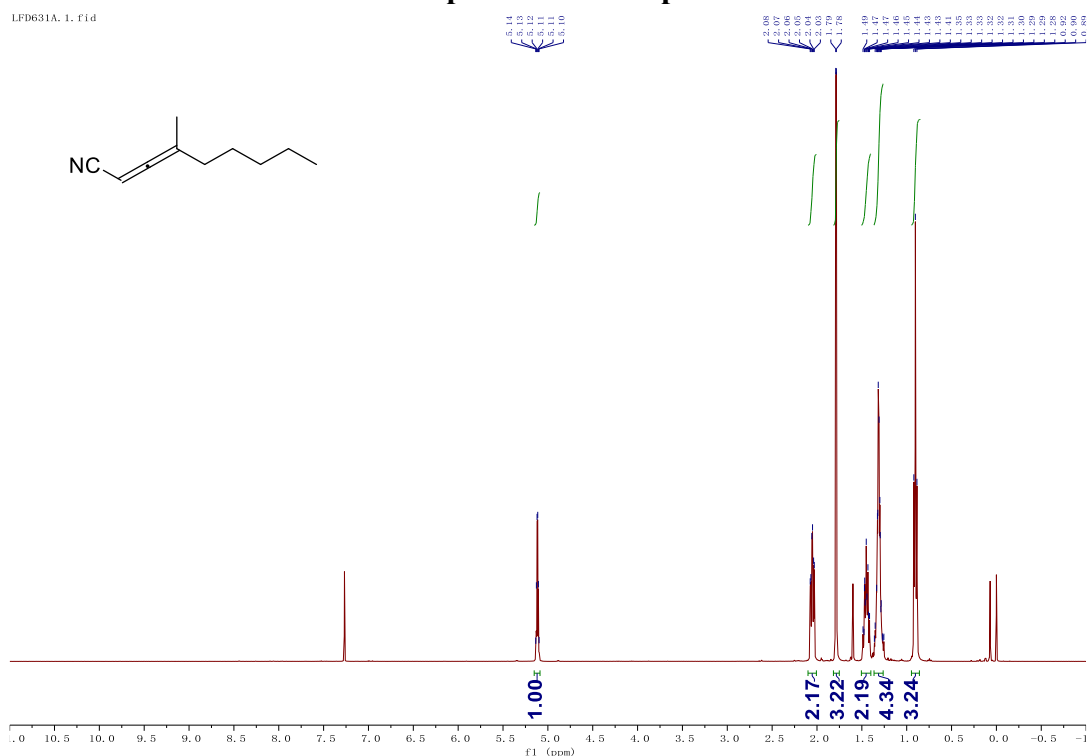

### <sup>13</sup>C NMR spectrum of compound 3k

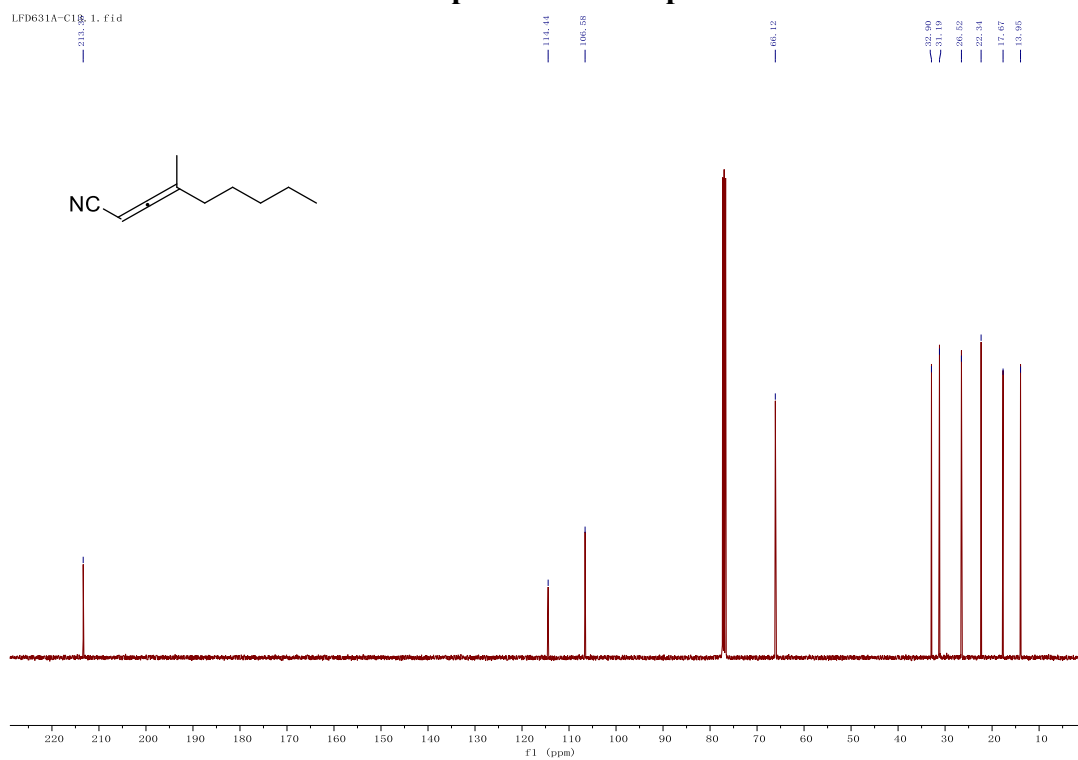

### <sup>1</sup>H NMR spectrum of compound 3l

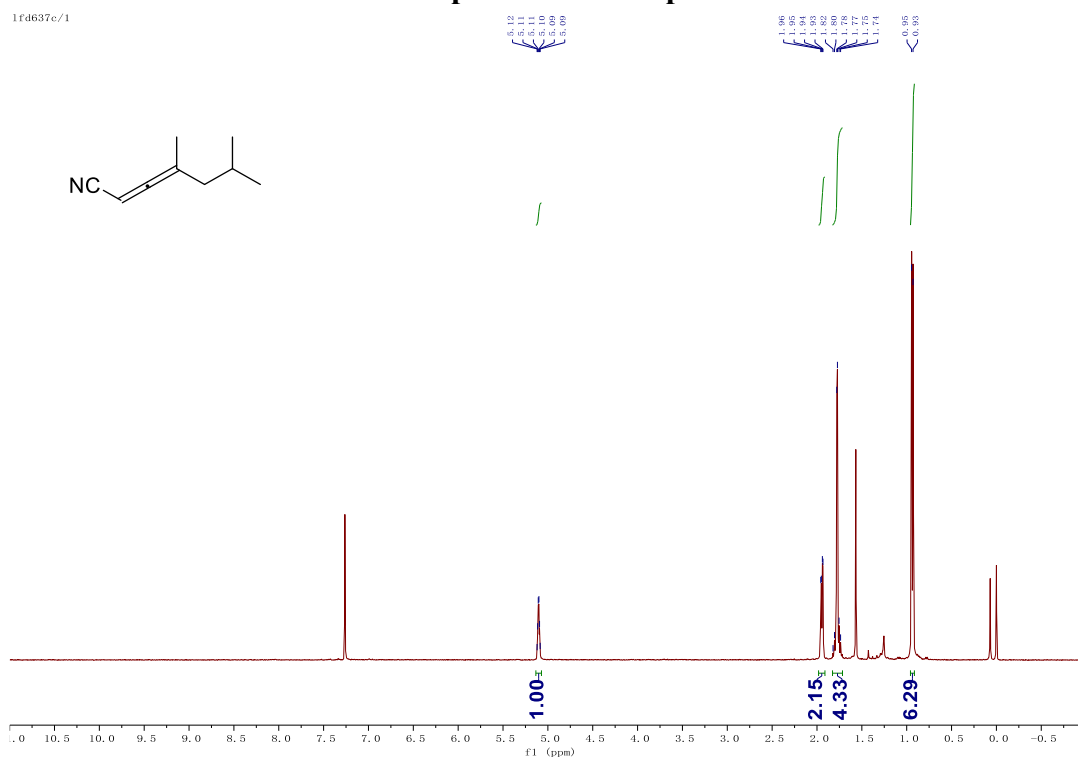

### <sup>13</sup>C NMR spectrum of compound 3l

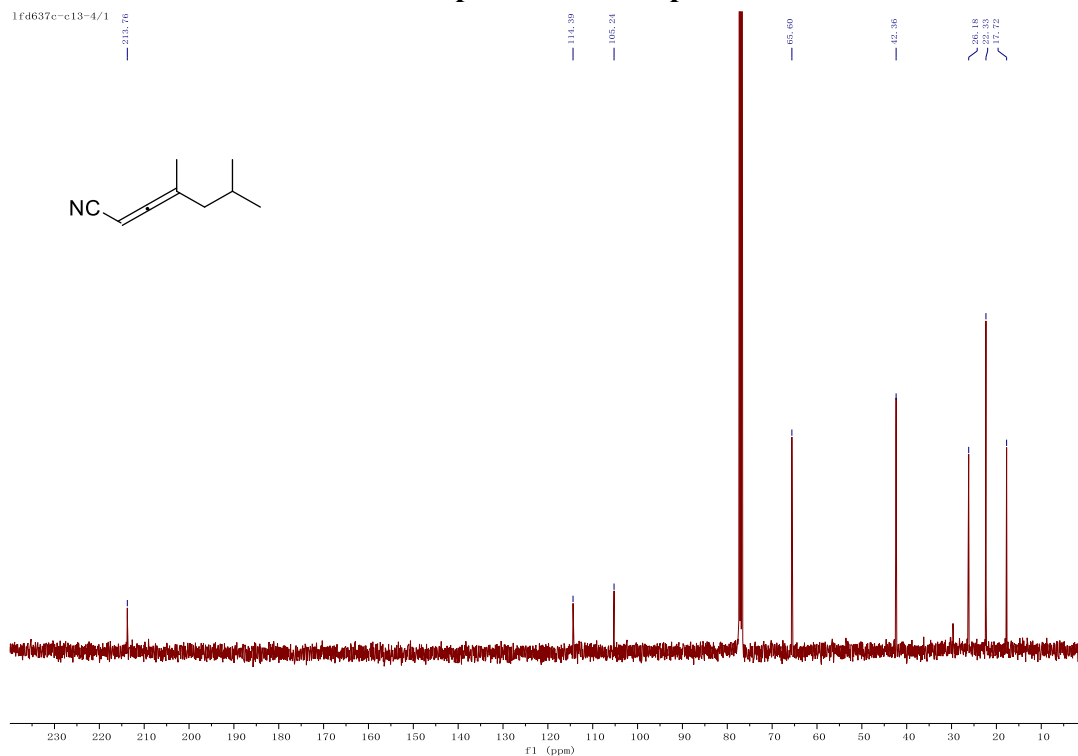

### <sup>1</sup>H NMR spectrum of compound 3m

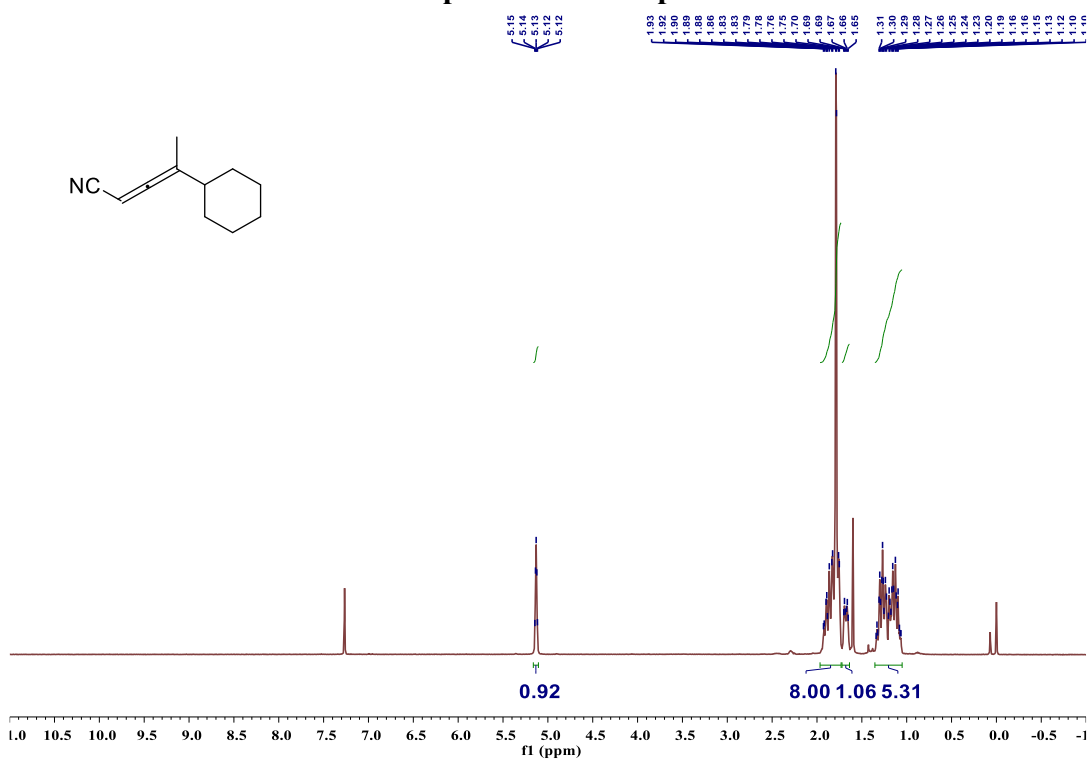

### <sup>13</sup>C NMR spectrum of compound 3m

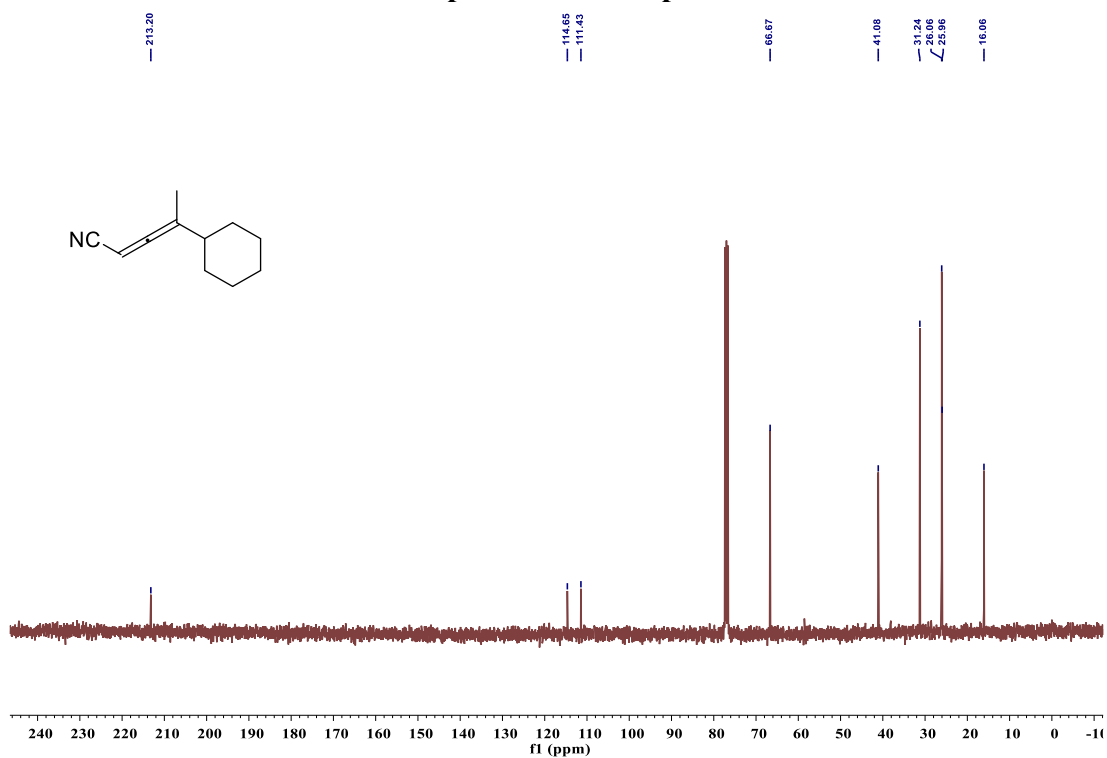

### <sup>1</sup>H NMR spectrum of compound 3n

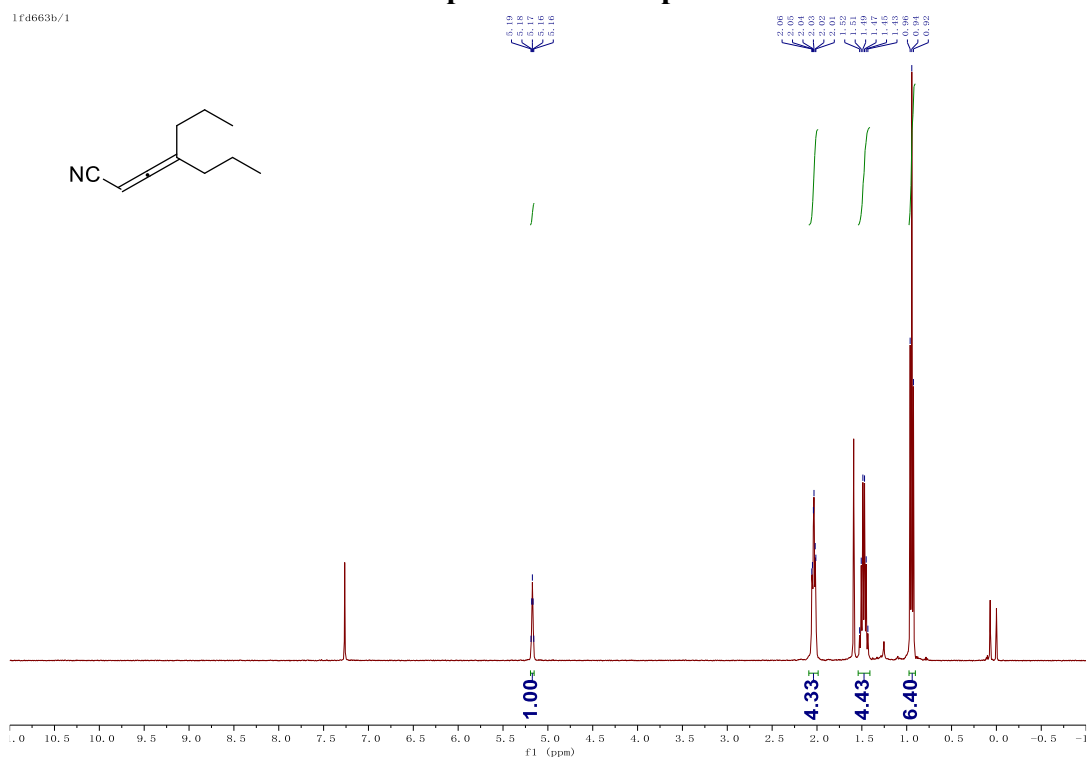

### <sup>13</sup>C NMR spectrum of compound 3n

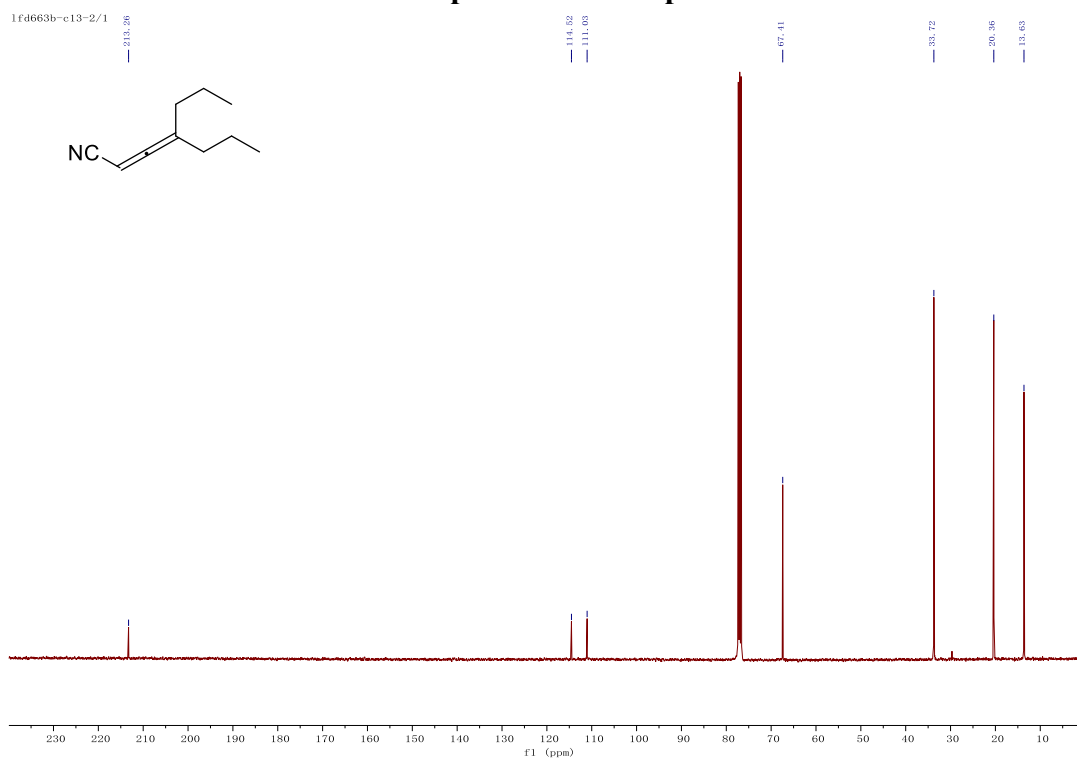

### <sup>1</sup>H NMR spectrum of compound 3o

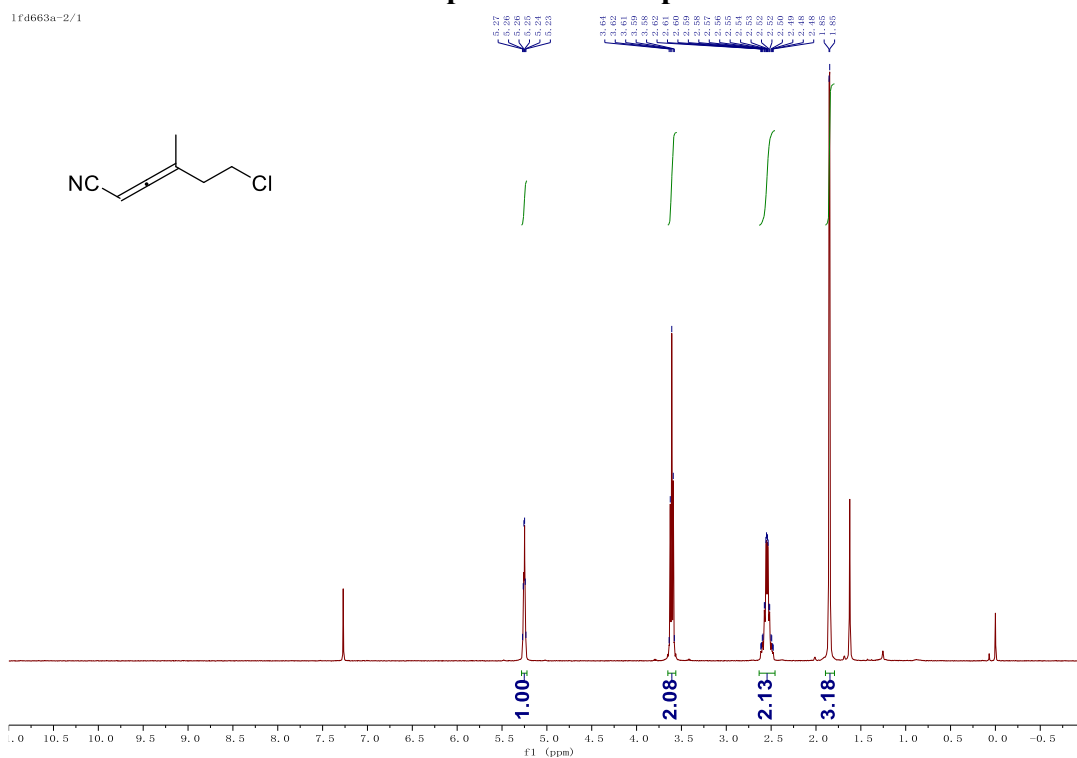

### <sup>13</sup>C NMR spectrum of compound 3o

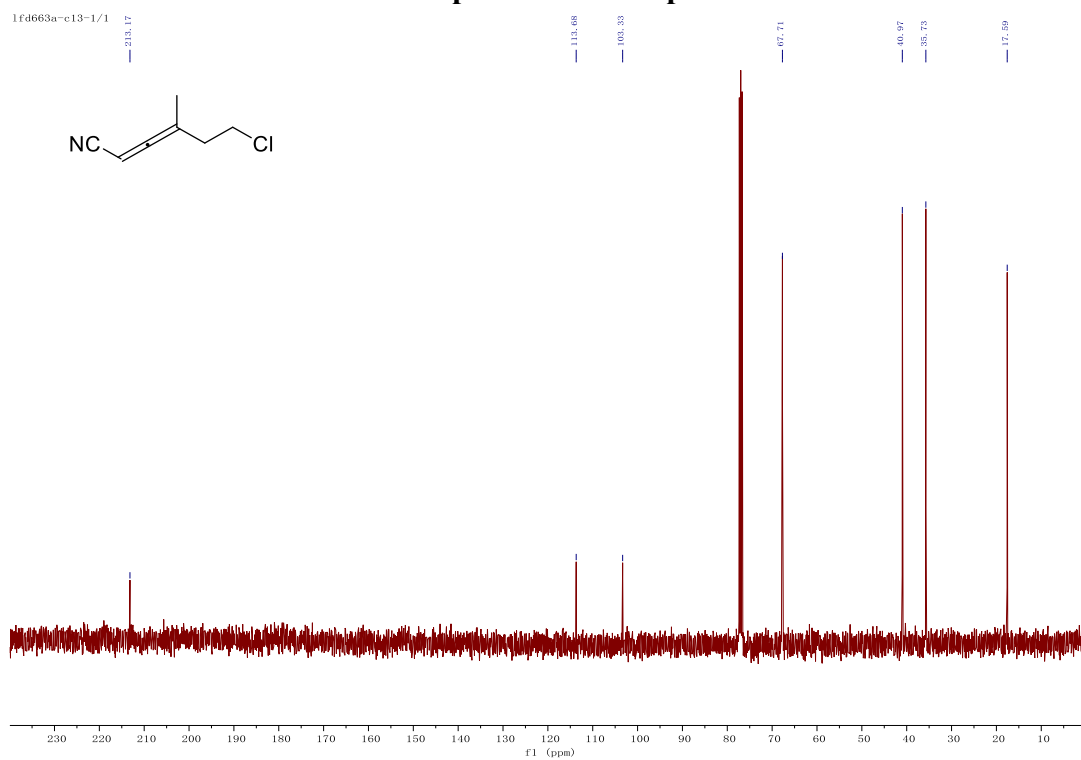

### <sup>1</sup>H NMR spectrum of compound 3p

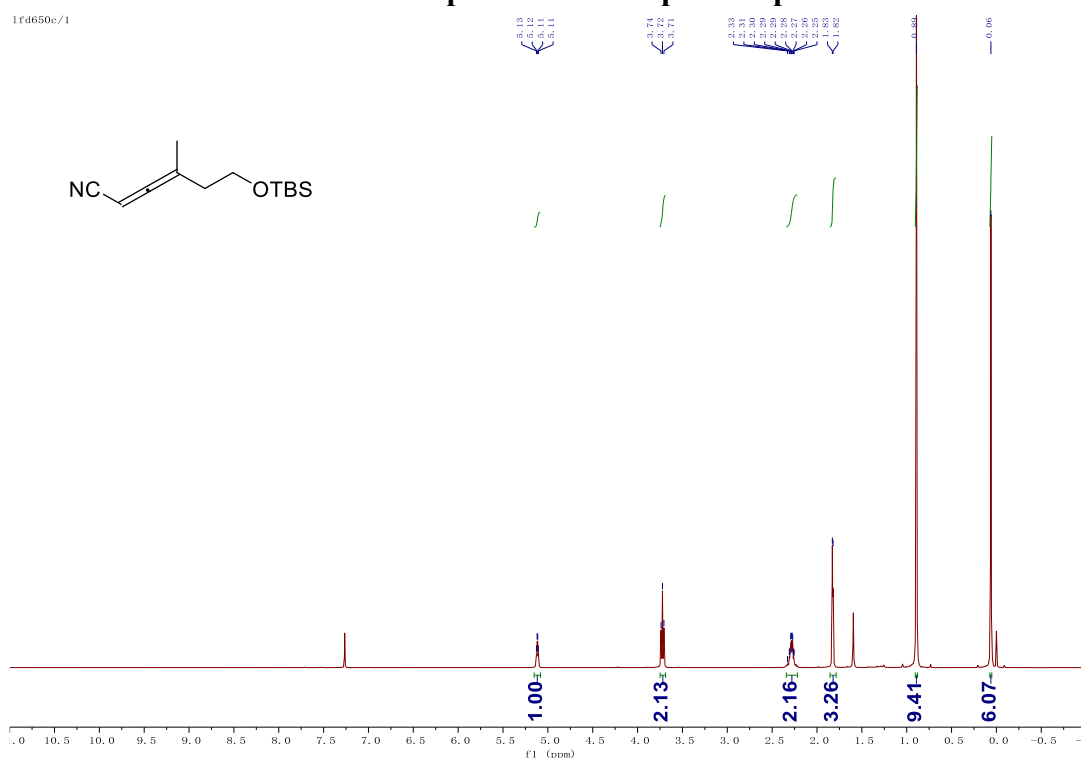

### <sup>13</sup>C NMR spectrum of compound 3p

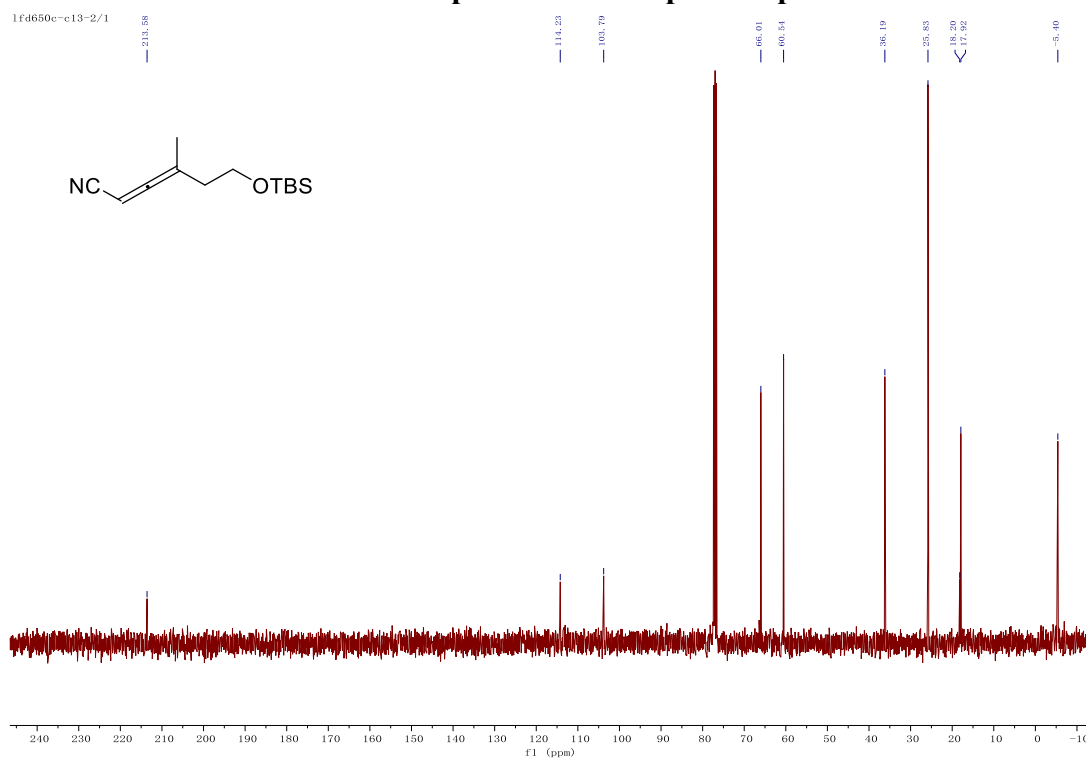

### <sup>1</sup>H NMR spectrum of compound 3q

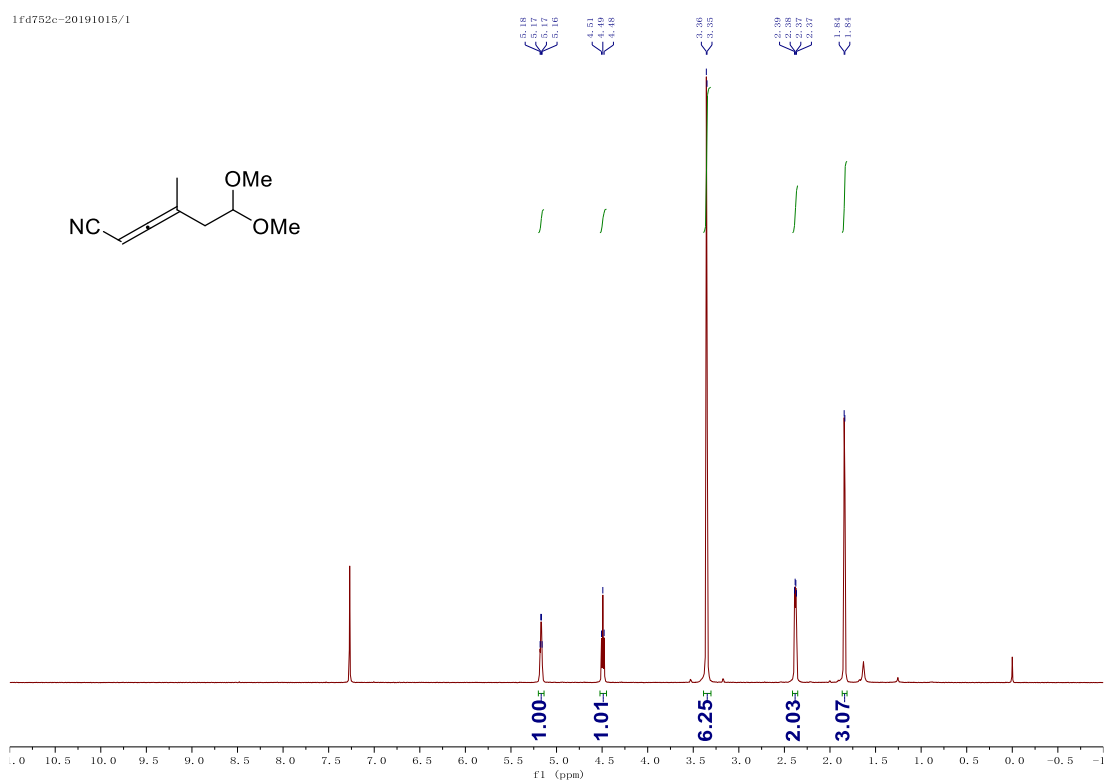



### <sup>13</sup>C NMR spectrum of compound 3q

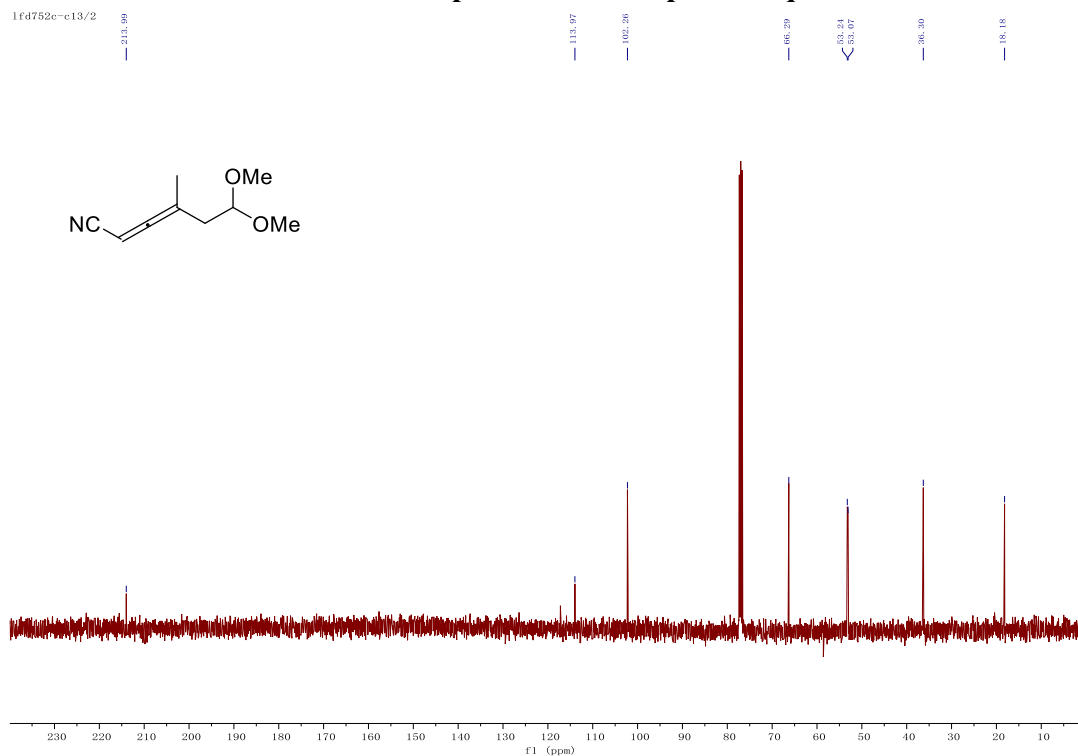

### <sup>1</sup>H NMR spectrum of compound 3r

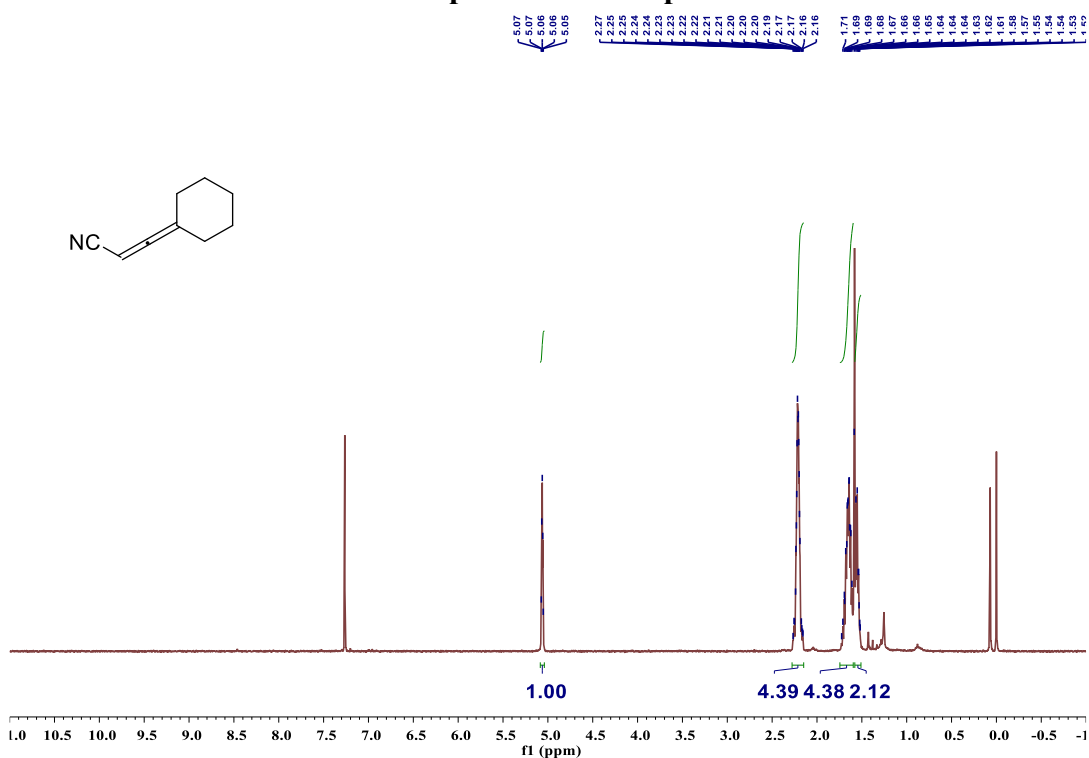

### <sup>13</sup>C NMR spectrum of compound 3r

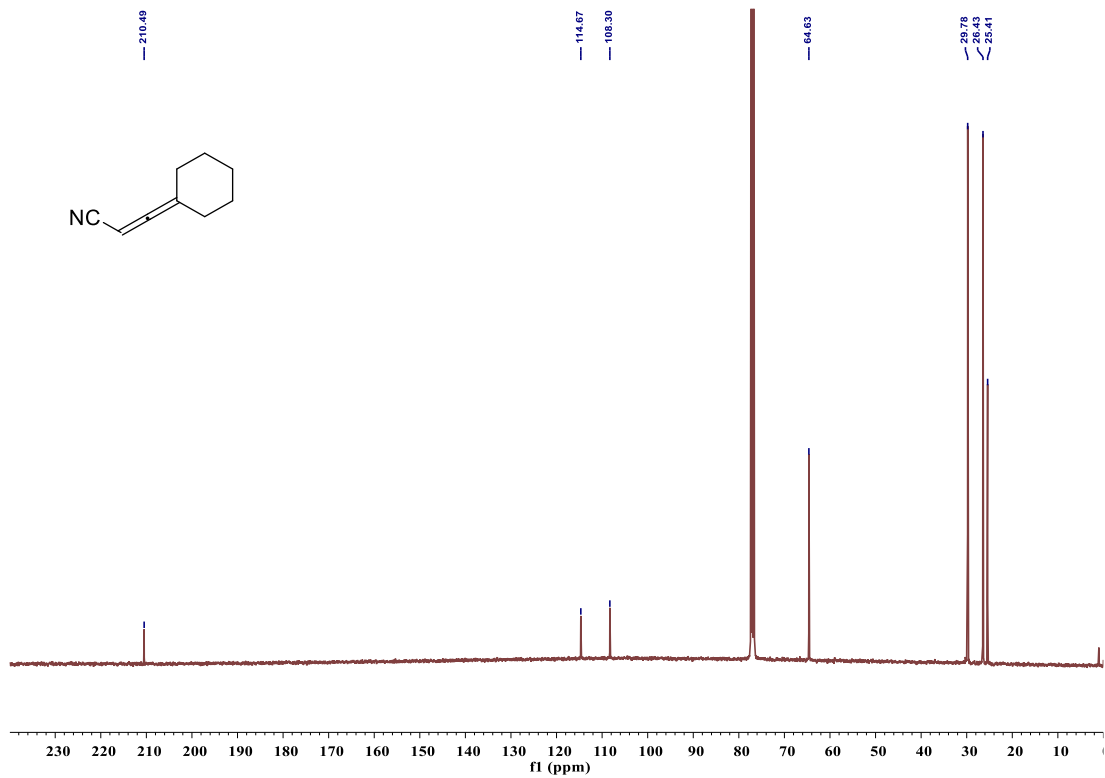

**<sup>1</sup>H NMR spectrum of compound 3s**

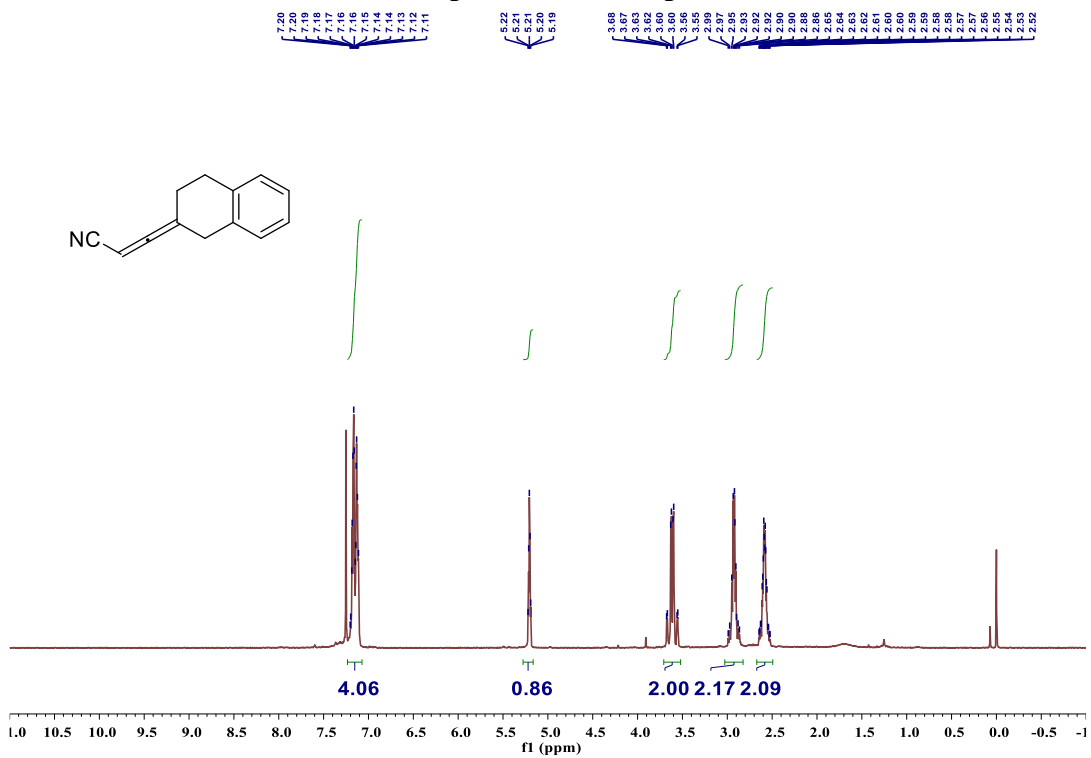

### <sup>13</sup>C NMR spectrum of compound 3s

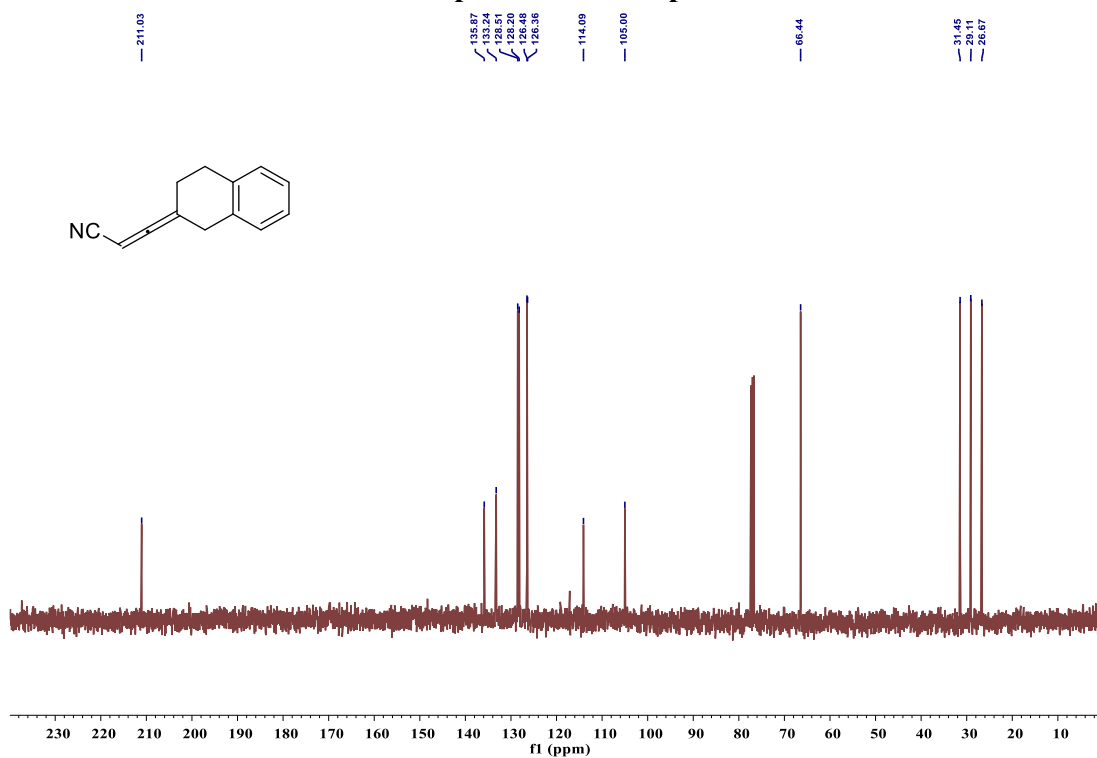

### <sup>1</sup>H NMR spectrum of compound 3t

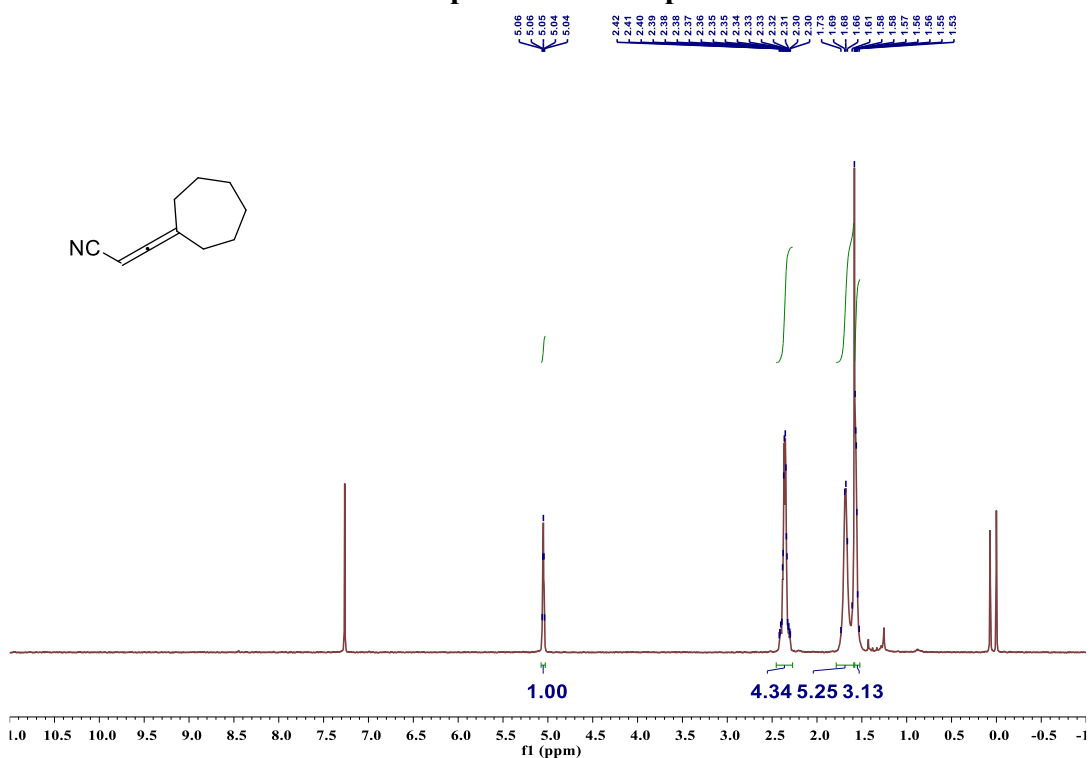



### <sup>13</sup>C NMR spectrum of compound 3u

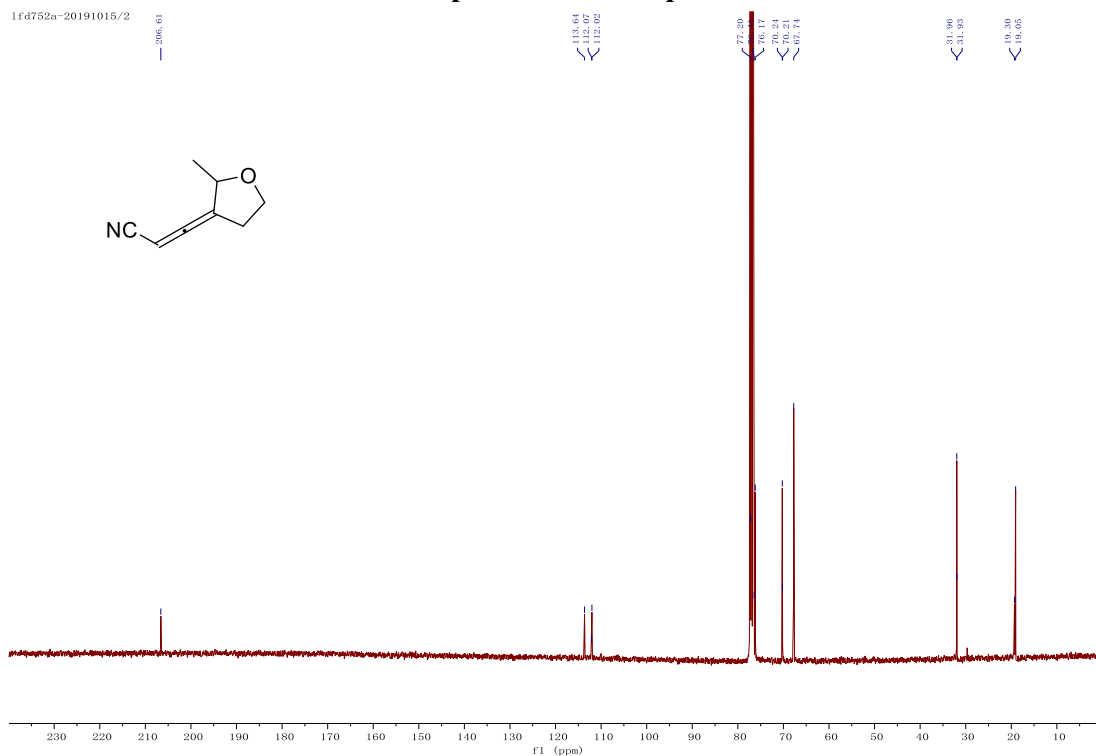

### <sup>1</sup>H NMR spectrum of compound 3v

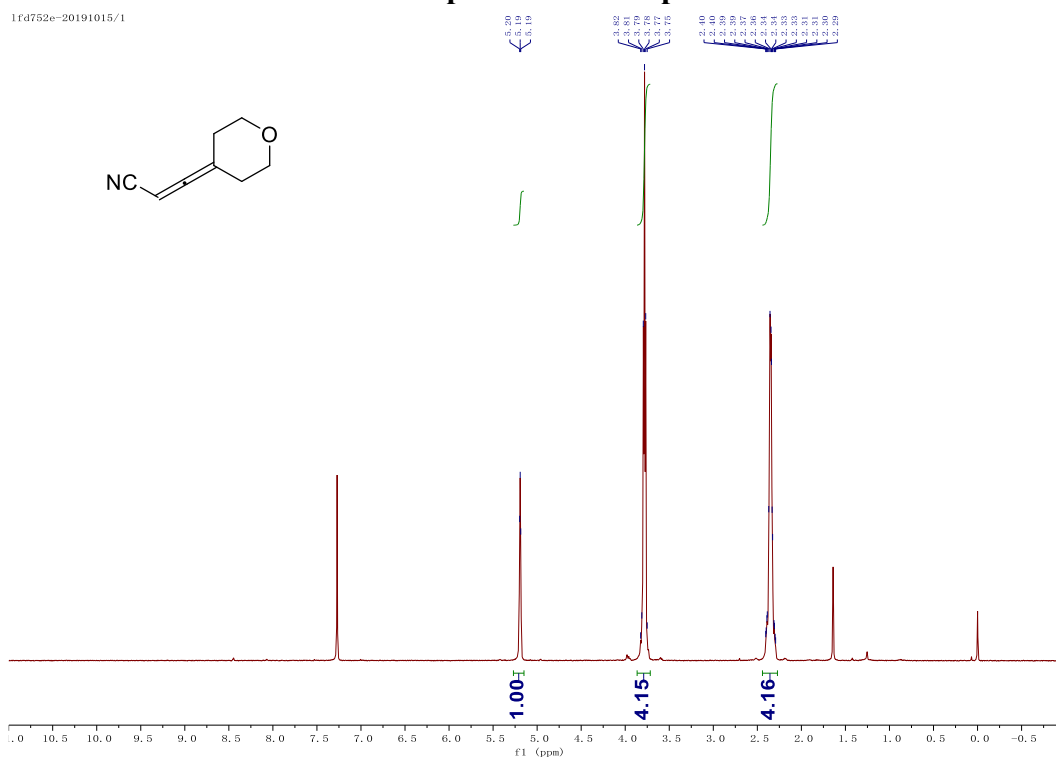



### <sup>13</sup>C NMR spectrum of compound 3w

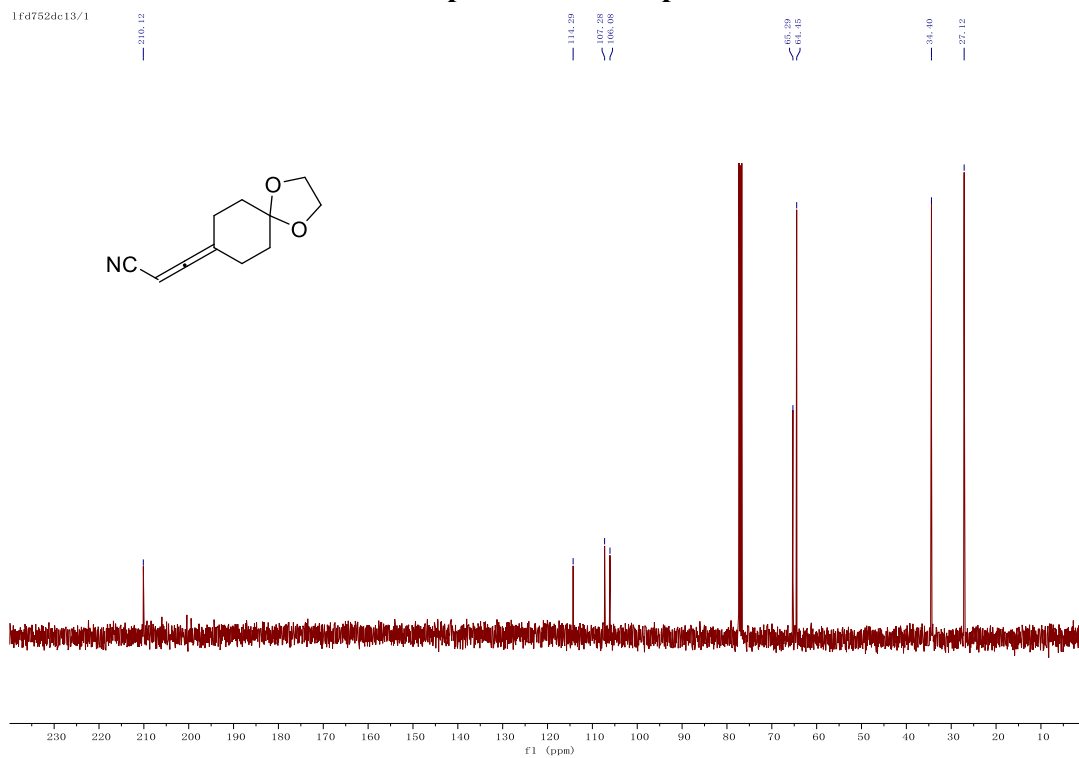

### <sup>1</sup>H NMR spectrum of compound 3x

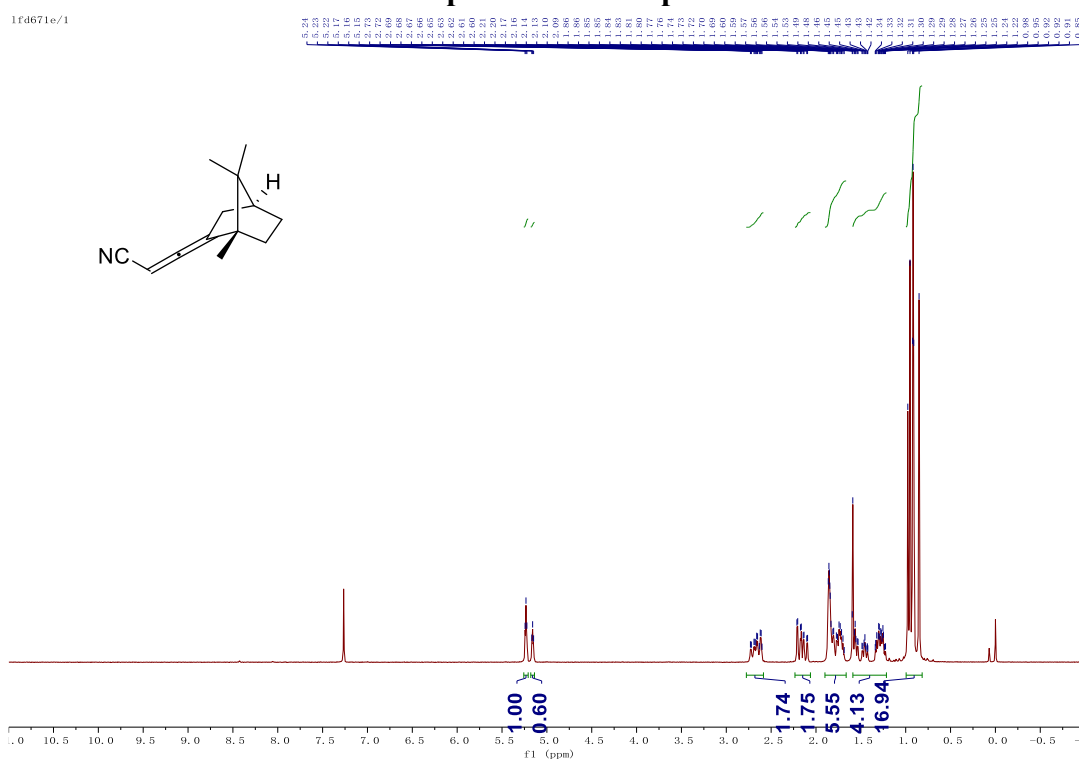

### <sup>13</sup>C NMR spectrum of compound 3x

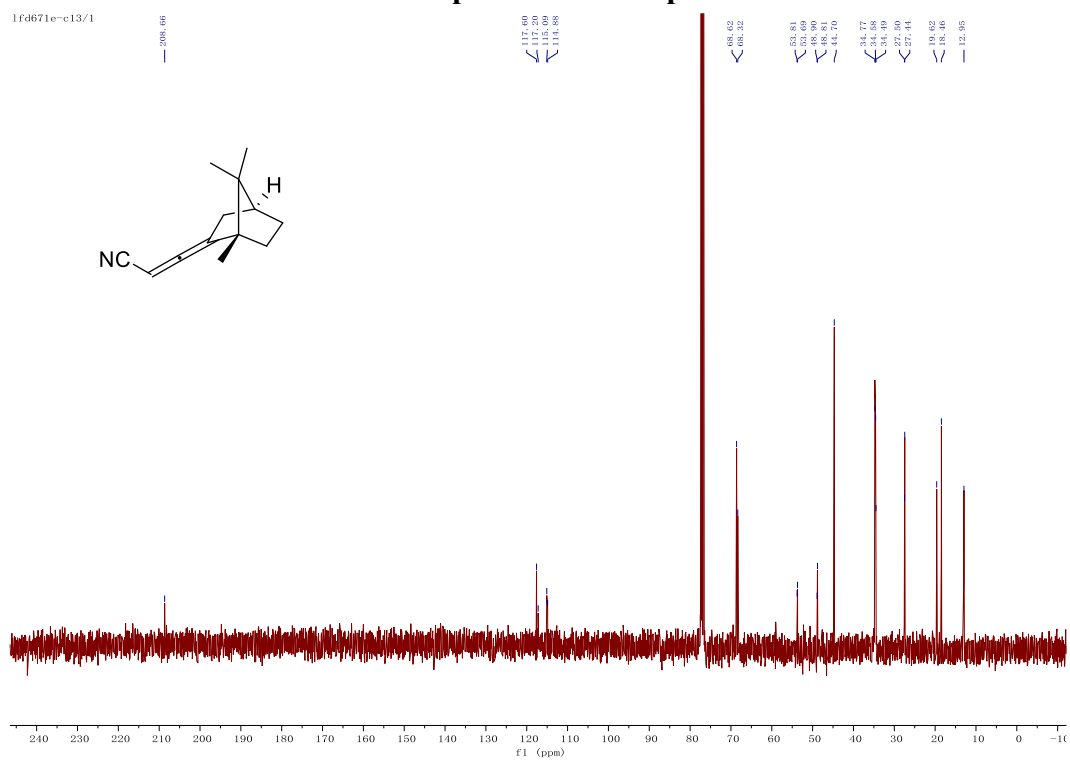

### <sup>1</sup>H NMR spectrum of compound 4a

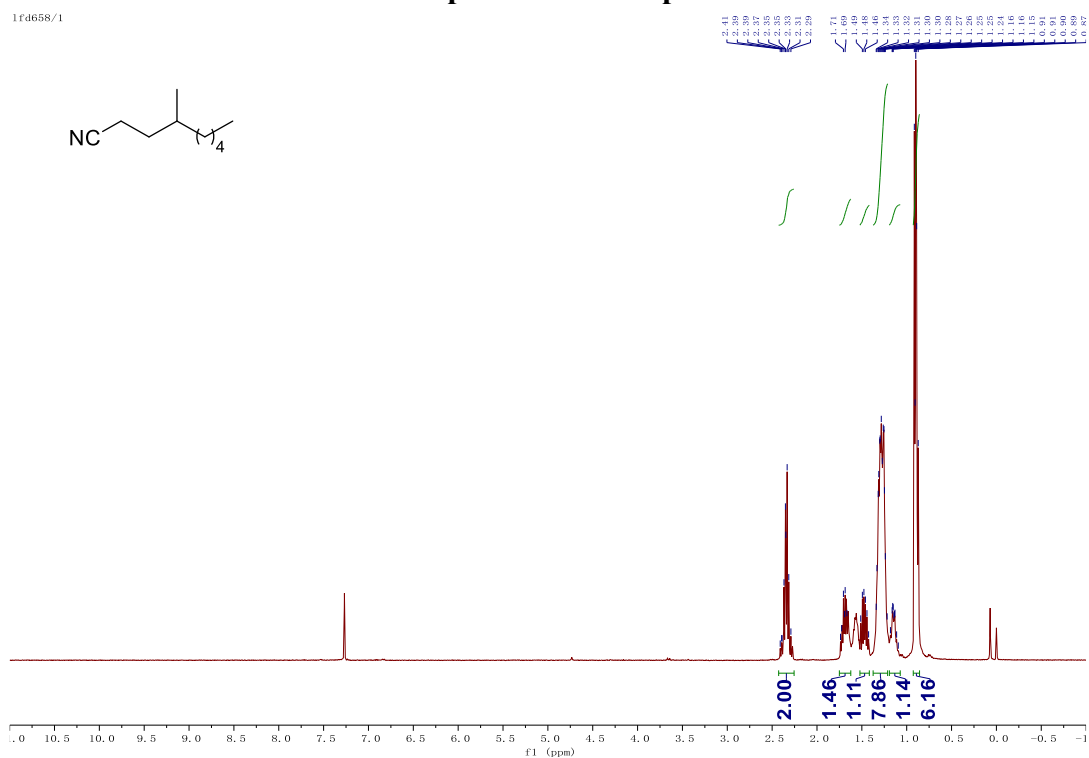



### <sup>13</sup>C NMR spectrum of compound 4a

1fd658-c13-2/1

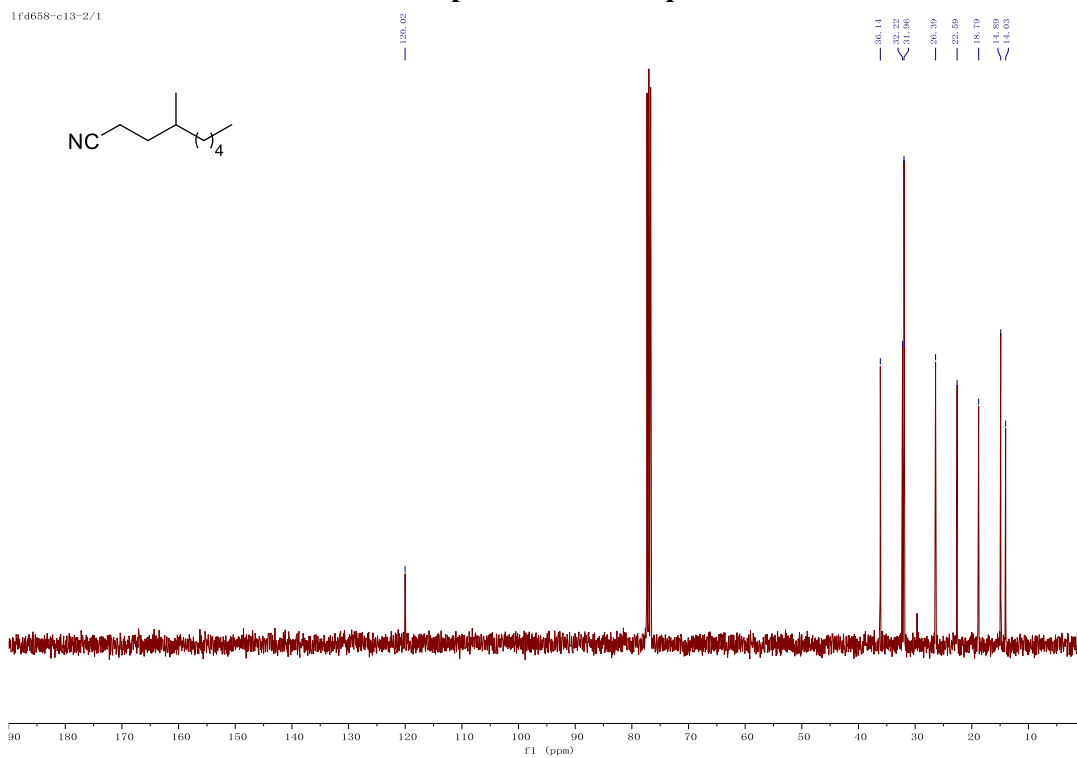

### <sup>1</sup>H NMR spectrum of compound Z-4b

1fd746s/1

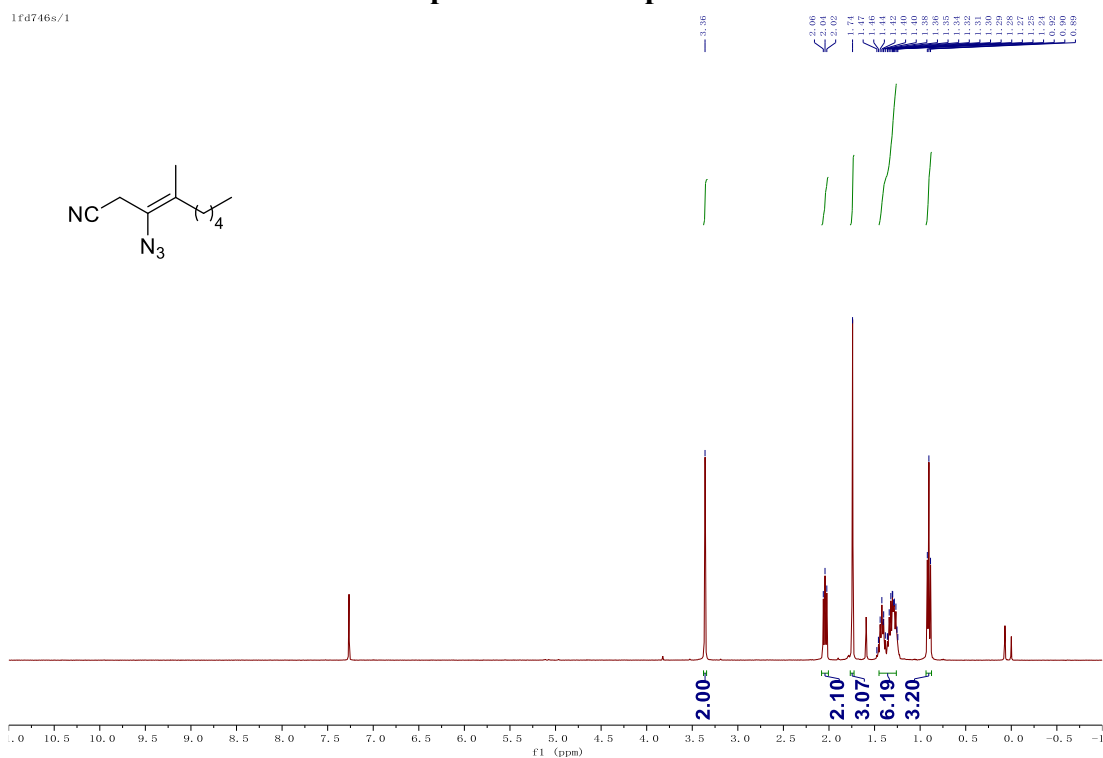

# <sup>13</sup>C NMR spectrum of compound Z-4b

1fd746s. 4. fid

130.04

118.49

115.80

34.03

31.53

27.49

22.46

17.26

13.91

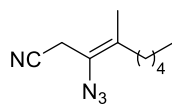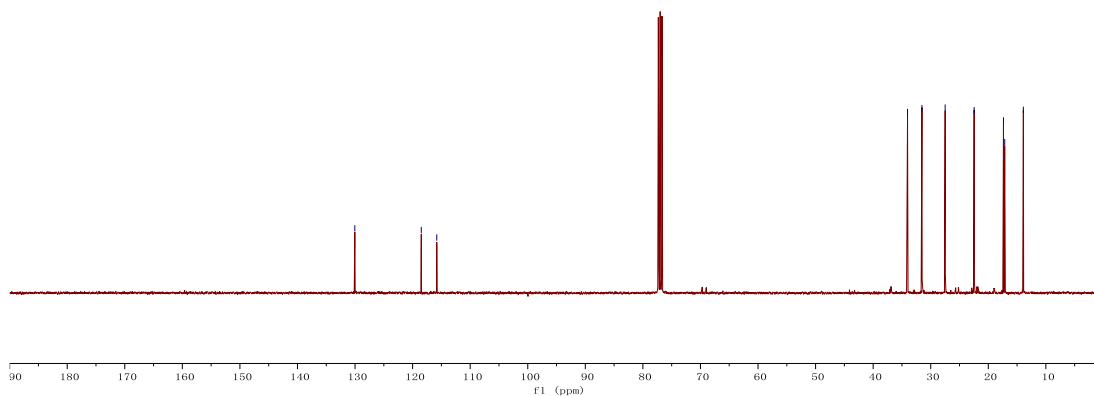

# 2D-Cosy spectrum of compound Z-4b

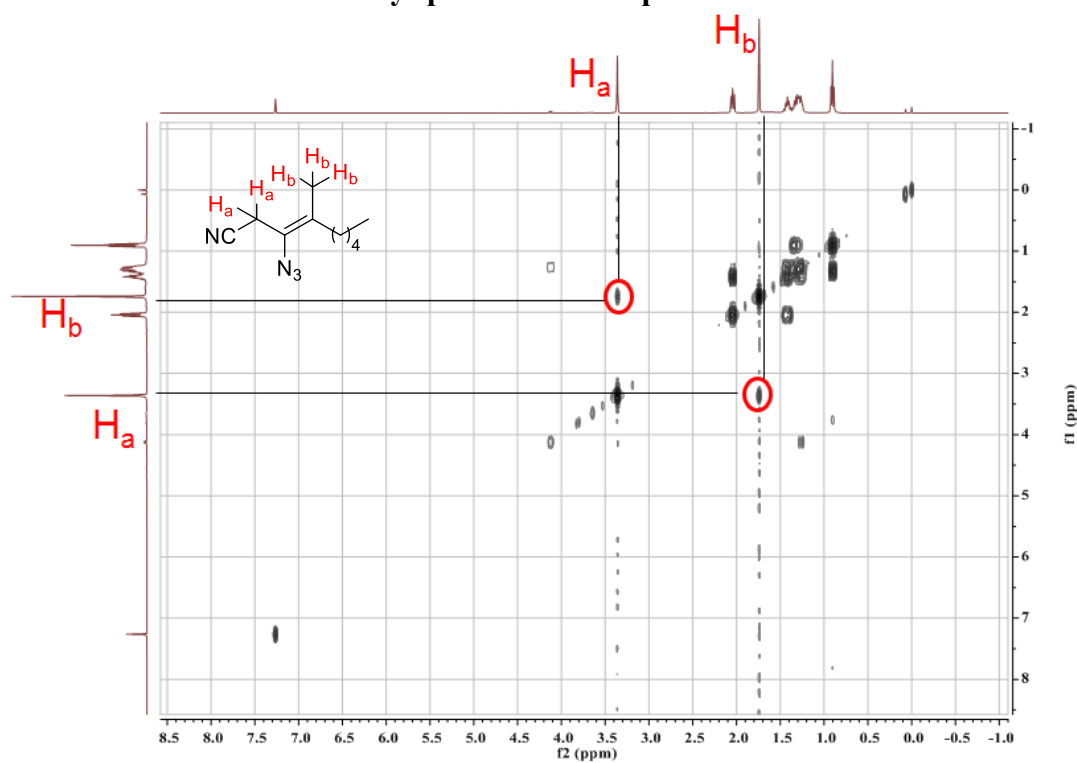

### <sup>1</sup>H NMR spectrum of compound E-4b

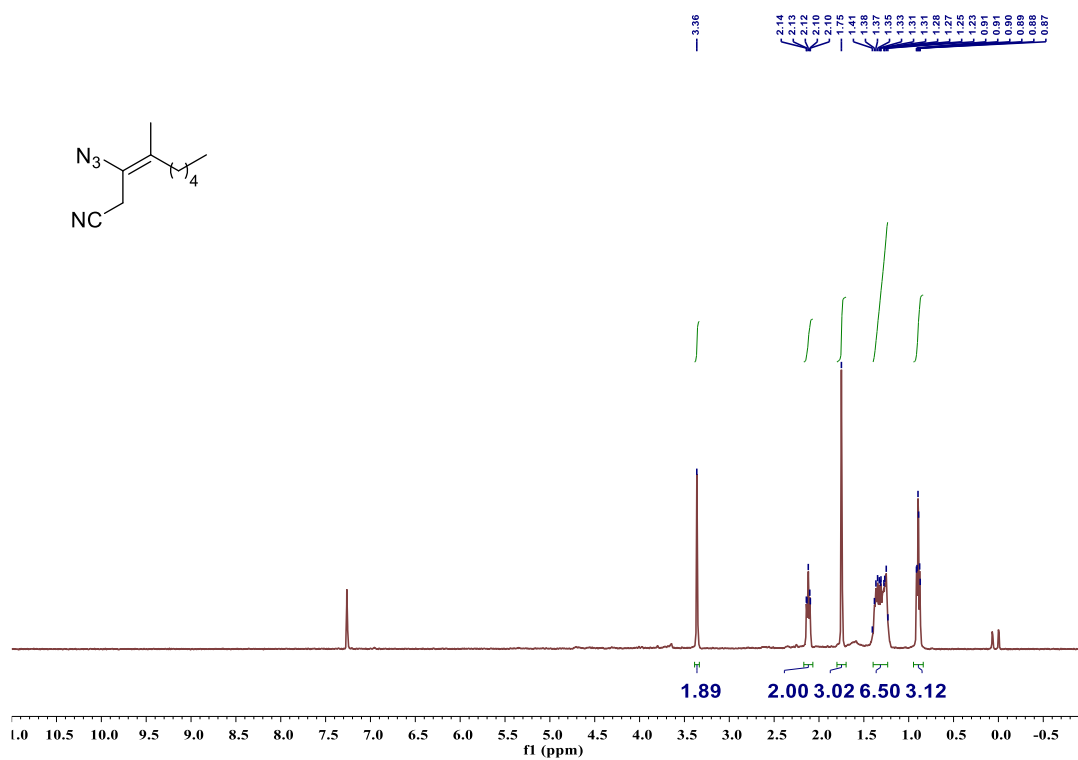

### <sup>13</sup>C NMR spectrum of compound E-4b

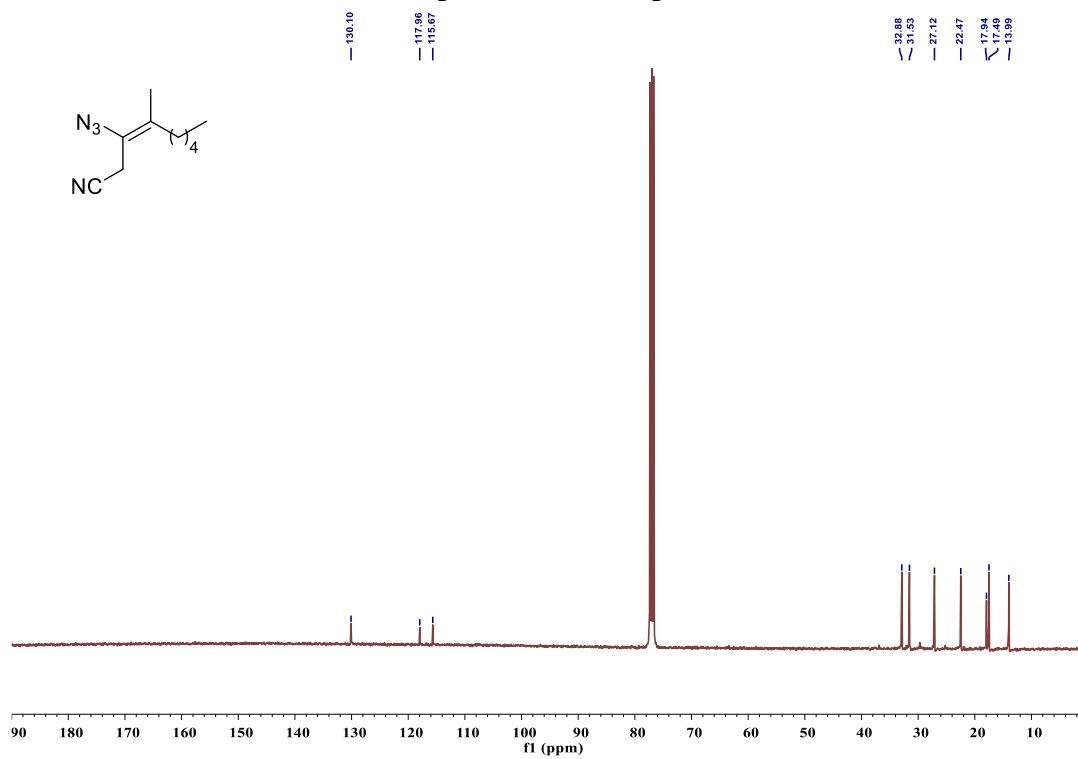

# <sup>1</sup>H NMR spectrum of compound 4c

1fd744/1

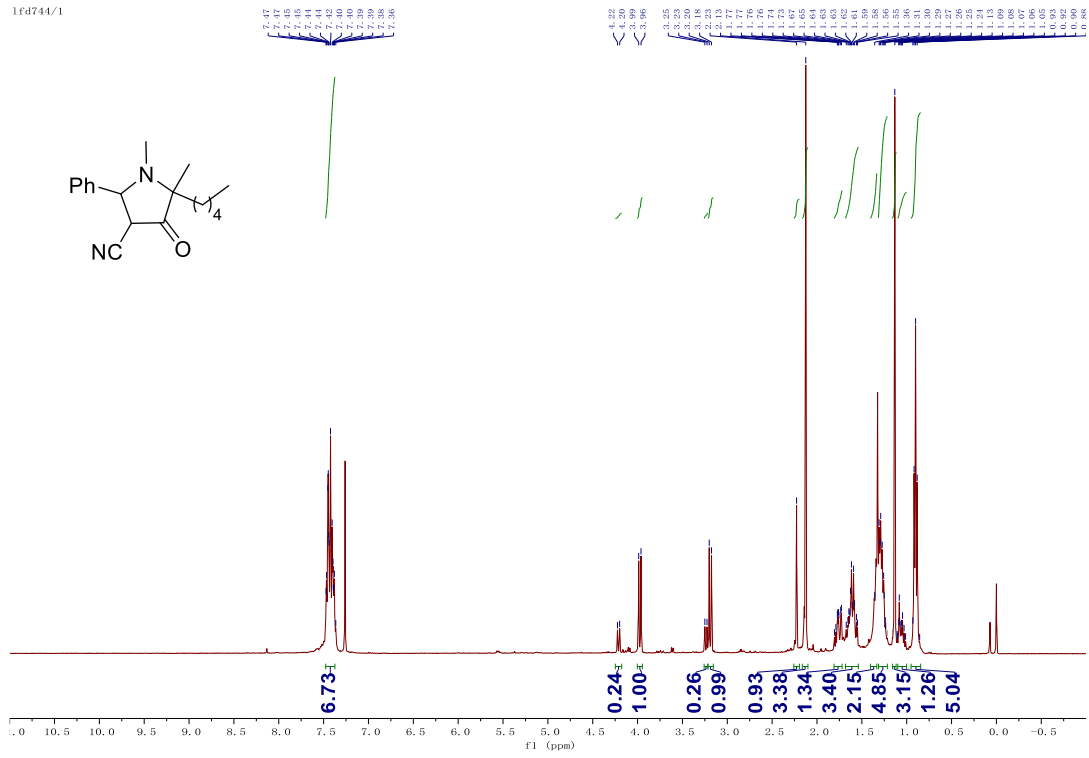

# <sup>13</sup>C NMR spectrum of compound 4c

1fd744.1.37

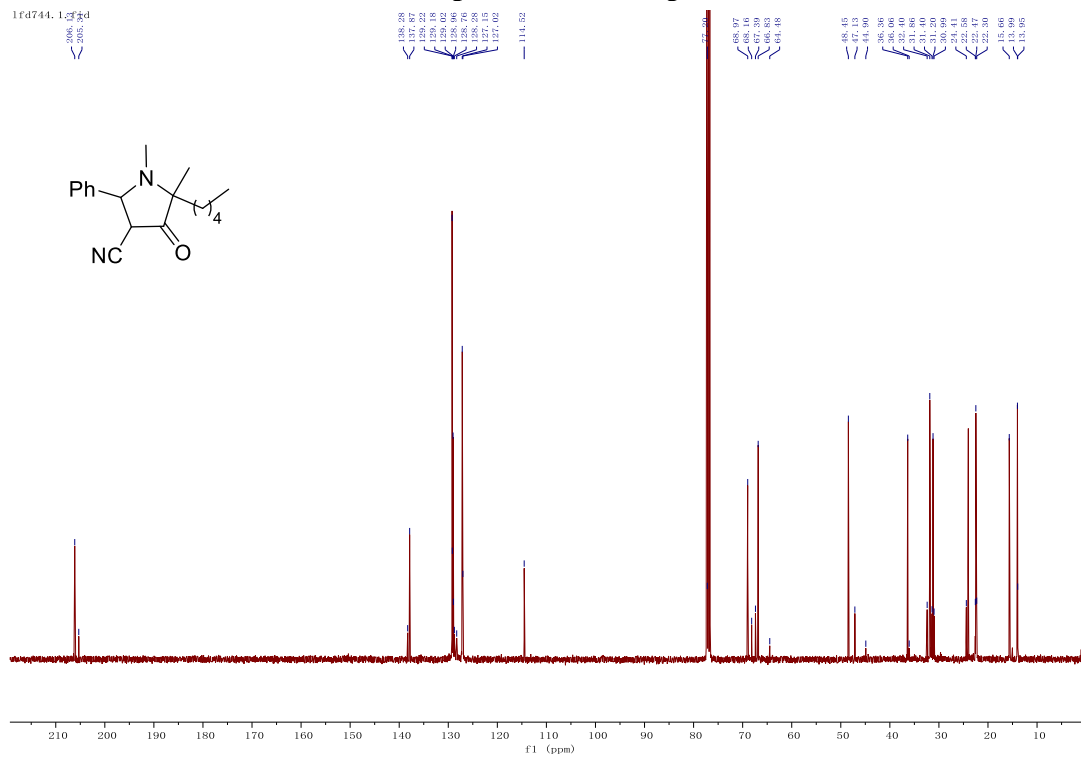

### <sup>1</sup>H NMR spectrum of compound 5a

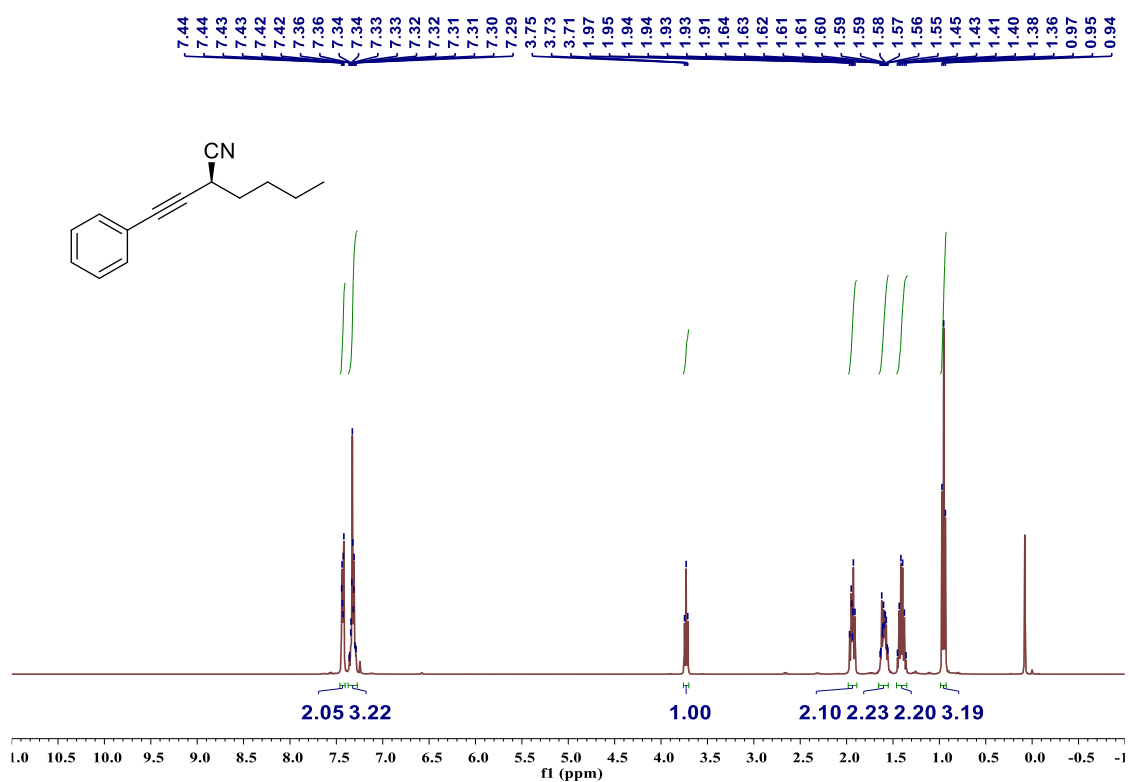

### <sup>13</sup>C NMR spectrum of compound 5a

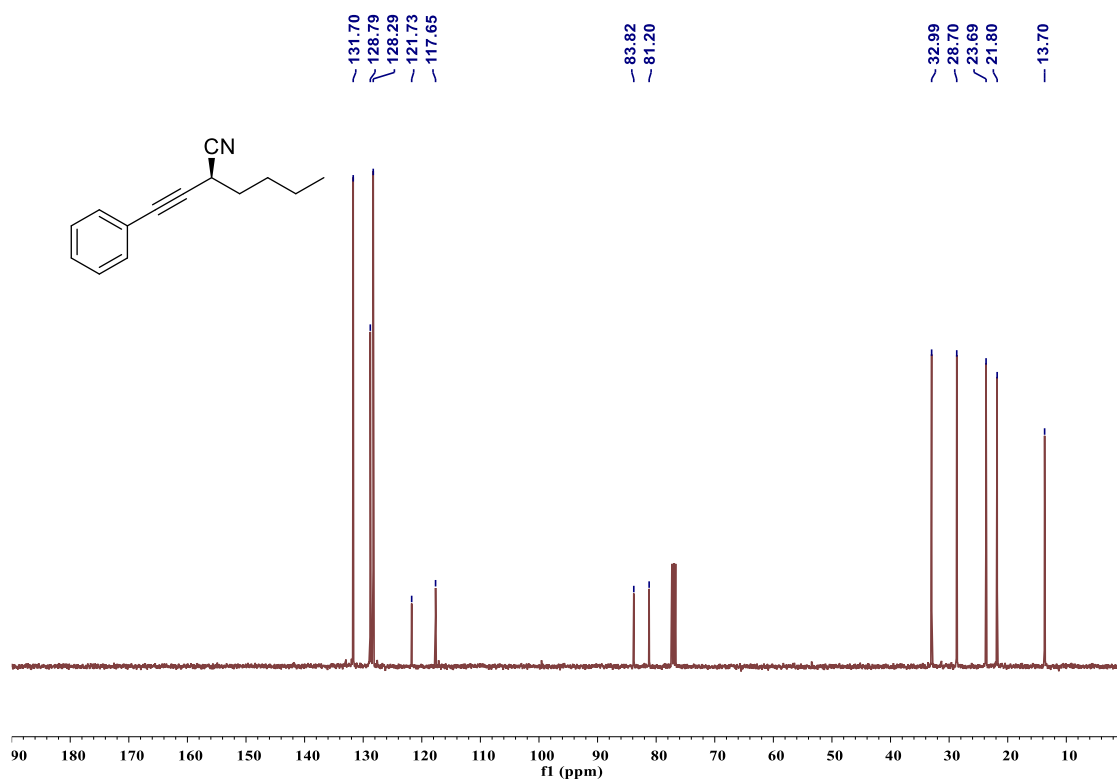

Supplement: d2qo00938b1.pdf [file d2qo00938b1.pdf]
